# Supplementary material for: [Retracted] Identification of the Potential Biomarkers Involved in the Human Oral Mucosal Wound Healing: A Bioinformatic Study
Source: Hindawi journal article supplement (doi:10.1155/2021/6695245), 2021-01-01
Supplement: f1 [file 6695245.f1.pdf]

| id        | baseMean    | baseMeanA   | baseMeanB   | foldChange  | log2FoldChange |
|-----------|-------------|-------------|-------------|-------------|----------------|
| DEFB4A    | 40.12592202 | 2.388342829 | 77.86350121 | 32.60147591 | 5.026865374    |
| S100A7    | 310.8577865 | 17.06716445 | 604.6484086 | 35.42758437 | 5.146801193    |
| DEFB4B    | 13.92443864 | 0.574209889 | 27.27466739 | 47.4994735  | 5.569839617    |
| FLG       | 21.40742999 | 40.18729601 | 2.627563967 | 0.06538295  | -3.934941717   |
| KRT76     | 8.600349973 | 16.71020771 | 0.490492234 | 0.029352851 | -5.090355561   |
| CES1      | 9.660383778 | 18.36781446 | 0.952953092 | 0.051881681 | -4.268630963   |
| CCL19     | 11.84998391 | 1.619643804 | 22.08032401 | 13.63282714 | 3.769012871    |
| ALOX12    | 101.6107694 | 186.2771075 | 16.94443134 | 0.090963573 | -3.45856726    |
| CYP4F35P  | 13.31744838 | 24.28438334 | 2.350513417 | 0.096791151 | -3.368981032   |
| ETNK2     | 25.88451428 | 47.10399538 | 4.66503319  | 0.09903689  | -3.335890184   |
| TUBB3     | 9.802023027 | 1.010701655 | 18.5933444  | 18.3964717  | 4.20135719     |
| DPT       | 13.10894252 | 23.69376151 | 2.524123519 | 0.106531144 | -3.230652836   |
| KPRP      | 12.68057642 | 23.26990123 | 2.091251612 | 0.089869381 | -3.47602653    |
| CLEC3B    | 16.77293577 | 29.85829152 | 3.687580023 | 0.123502714 | -3.017385355   |
| ANKRD37   | 55.14817581 | 100.8559119 | 9.440439669 | 0.093603235 | -3.417297792   |
| CYP4F29P  | 22.09974993 | 39.2302844  | 4.969215452 | 0.126667842 | -2.980877795   |
| KRT3      | 46.56198492 | 82.43066969 | 10.69330015 | 0.129724776 | -2.946474052   |
| CRISP3    | 47.96509917 | 84.80899095 | 11.12120739 | 0.13113241  | -2.930903794   |
| PPP1R3C   | 50.11790617 | 89.58462414 | 10.65118821 | 0.118895271 | -3.072236755   |
| SOCS3     | 7.850826865 | 1.02940068  | 14.67225305 | 14.2531993  | 3.83321388     |
| KRT16P2   | 25.30933893 | 6.520767867 | 44.09790999 | 6.762686679 | 2.757596514    |
| KLK6      | 49.11906573 | 12.67536641 | 85.56276506 | 6.750318869 | 2.754955653    |
| MFAP4     | 14.13918549 | 23.95184661 | 4.326524375 | 0.180634272 | -2.468856452   |
| CD177     | 6.239805141 | 0.53206647  | 11.94754381 | 22.45498351 | 4.488963757    |
| CDH3      | 20.64667687 | 5.975958658 | 35.31739508 | 5.909912887 | 2.563136865    |
| ANKRD20A5 | 6.083548213 | 11.44315828 | 0.723938146 | 0.063263841 | -3.982475039   |
| PSCA      | 36.97690958 | 63.83741208 | 10.11640709 | 0.158471447 | -2.657705169   |
| SFRP2     | 27.36961886 | 45.66673972 | 9.072497998 | 0.198667522 | -2.331572057   |
| DUSP5     | 32.63659972 | 55.26694413 | 10.00625531 | 0.181053168 | -2.465514675   |
| CLDN17    | 30.11304599 | 49.52880336 | 10.69728863 | 0.215981165 | -2.211022592   |
| ANKRD20A1 | 5.14097012  | 9.791448005 | 0.490492234 | 0.050093943 | -4.319220028   |
| H19       | 89.68581608 | 150.1706135 | 29.20101865 | 0.194452283 | -2.362511921   |
| CFD       | 30.8592681  | 50.37293392 | 11.34560228 | 0.225232112 | -2.150515565   |
| KRT17     | 544.8325546 | 126.6607719 | 963.0043372 | 7.603019646 | 2.926572519    |
| ATP6V1C2  | 15.89006801 | 25.62583738 | 6.154298639 | 0.240159904 | -2.057932791   |
| EDN2      | 7.800105813 | 13.96698991 | 1.633221719 | 0.11693441  | -3.096228568   |
| TIMP1     | 46.8435058  | 17.05217742 | 76.63483418 | 4.494137746 | 2.168044344    |
| CALML5    | 155.8499892 | 262.4127456 | 49.28723275 | 0.187823319 | -2.412551907   |
| CA3       | 3.855735139 | 7.505397834 | 0.206072445 | 0.027456565 | -5.186705034   |
| MAP1LC3A  | 21.66958413 | 34.82926733 | 8.50990093  | 0.244331896 | -2.033085883   |
| PLA2G4E   | 16.37047848 | 6.292757388 | 26.44819957 | 4.202958725 | 2.071405289    |
| CAPN14    | 7.894225932 | 2.461292567 | 13.3271593  | 5.414699364 | 2.436881238    |
| SLC16A1   | 5.674237075 | 1.010701655 | 10.33777249 | 10.22831262 | 3.354496256    |
| CCL2      | 10.80691703 | 4.233956028 | 17.37987803 | 4.1048792   | 2.037339766    |
| YOD1      | 8.221507378 | 13.85905543 | 2.583959329 | 0.186445558 | -2.423173665   |
| IGFL1     | 70.64922312 | 117.4089365 | 23.88950968 | 0.203472669 | -2.297093074   |

|           |             |             |             |             |              |
|-----------|-------------|-------------|-------------|-------------|--------------|
| ACER1     | 9.139090499 | 15.18815617 | 3.090024825 | 0.203449635 | -2.297256405 |
| SELE      | 4.50164524  | 0.513367445 | 8.489923035 | 16.53771215 | 4.047687759  |
| CYBRD1    | 12.73446027 | 19.89837683 | 5.570543706 | 0.279949654 | -1.836760698 |
| RNASE7    | 13.16933518 | 20.54713886 | 5.791531505 | 0.281865594 | -1.826920708 |
| KRT31     | 8.499335651 | 14.22265522 | 2.776016086 | 0.195182689 | -2.357102993 |
| FSCN1     | 47.40503019 | 18.95130963 | 75.85875076 | 4.002823669 | 2.001018064  |
| FOS       | 22.74799811 | 9.509507758 | 35.98648846 | 3.784264062 | 1.920012762  |
| TIMP3     | 12.42710963 | 19.31554486 | 5.538674392 | 0.286746992 | -1.802149742 |
| GSTT1     | 11.42047189 | 18.2163352  | 4.624608581 | 0.253871513 | -1.977829575 |
| CPA4      | 13.73247085 | 21.38330851 | 6.081633197 | 0.2844103   | -1.813954379 |
| CRCT1     | 872.5664709 | 1504.649395 | 240.4835466 | 0.159826965 | -2.645417261 |
| WNK4      | 5.721300747 | 9.974063064 | 1.46853843  | 0.147235727 | -2.763800305 |
| CDC20     | 17.54983537 | 7.964621559 | 27.13504919 | 3.406947711 | 1.768479805  |
| TCP11L2   | 11.67117661 | 18.19066574 | 5.151687487 | 0.283205    | -1.820081359 |
| MYZAP     | 16.19991816 | 25.09706141 | 7.302774908 | 0.290981274 | -1.781001782 |
| VSIG8     | 34.69505949 | 54.33097023 | 15.05914874 | 0.277174302 | -1.851134591 |
| LAMC2     | 7.835044749 | 2.611646434 | 13.05844306 | 5.000080751 | 2.321951395  |
| MGP       | 16.76867559 | 25.77682669 | 7.760524496 | 0.301065938 | -1.731848603 |
| HSPA2     | 17.97519429 | 27.59652443 | 8.35386415  | 0.302714357 | -1.723970994 |
| RASGEF1B  | 7.624807252 | 12.64049719 | 2.609117313 | 0.20640939  | -2.276419492 |
| RNF223    | 12.39969216 | 19.40473109 | 5.39465324  | 0.278007112 | -1.846806307 |
| MAMDC2    | 15.85647202 | 23.89383467 | 7.819109368 | 0.327243805 | -1.611562215 |
| PADI1     | 56.47426386 | 88.45997818 | 24.48854954 | 0.276831965 | -1.852917561 |
| CKM       | 6.594337904 | 10.88270524 | 2.305970565 | 0.211893138 | -2.238591226 |
| SCNN1B    | 19.81979169 | 30.68507521 | 8.954508162 | 0.291819658 | -1.776851022 |
| SH3BGRL2  | 30.5463966  | 47.12390737 | 13.96888583 | 0.296428853 | -1.754242214 |
| LTBP4     | 20.90613437 | 31.59167207 | 10.22059666 | 0.323521865 | -1.628064876 |
| DCN       | 54.97628175 | 85.13533828 | 24.81722522 | 0.29150322  | -1.778416277 |
| SNCG      | 19.13811871 | 29.59662922 | 8.679608214 | 0.293263403 | -1.769731048 |
| FAM25BP   | 13.79692107 | 21.19962802 | 6.394214124 | 0.301619166 | -1.729199989 |
| ALOX12-AS | 4.4534665   | 7.993153579 | 0.91377942  | 0.114320263 | -3.128846953 |
| CCL14     | 11.17448469 | 17.18863539 | 5.160333996 | 0.300217782 | -1.735918663 |
| KRT16P1   | 13.58071136 | 6.467873561 | 20.69354916 | 3.199436254 | 1.677817722  |
| ADM       | 21.93238902 | 33.57482573 | 10.28995231 | 0.306478205 | -1.706143615 |
| AVPI1     | 14.94895718 | 22.93209068 | 6.965823667 | 0.30375877  | -1.719002031 |
| VSIG10    | 13.44369478 | 20.54708758 | 6.340301974 | 0.308574242 | -1.696310456 |
| TP53INP2  | 53.27017837 | 82.3757256  | 24.16463114 | 0.293346504 | -1.769322295 |
| KRT16P3   | 22.29032801 | 10.53737658 | 34.04327944 | 3.230716791 | 1.691854288  |
| RND3      | 72.4945124  | 112.7684839 | 32.22054085 | 0.285722923 | -1.80731131  |
| CDC25B    | 17.30326783 | 8.401113326 | 26.20542233 | 3.119279709 | 1.641212926  |
| C11orf96  | 9.769610128 | 15.15507555 | 4.384144702 | 0.289285572 | -1.789433723 |
| NPM3      | 12.21209622 | 6.047502757 | 18.37668969 | 3.038723657 | 1.603465481  |
| IL18      | 80.27529355 | 125.2904672 | 35.26011994 | 0.281426997 | -1.829167363 |
| MXD1      | 71.09175975 | 110.6374797 | 31.54603979 | 0.285129776 | -1.810309389 |
| LCE3A     | 2.781757339 | 5.332284249 | 0.231230429 | 0.043364235 | -4.52735052  |
| CST6      | 31.57784604 | 48.12245045 | 15.03324163 | 0.312395597 | -1.678553975 |
| IGFBP6    | 134.1355245 | 210.2985023 | 57.97254668 | 0.275667901 | -1.858996807 |

|          |             |             |             |             |              |
|----------|-------------|-------------|-------------|-------------|--------------|
| BEX4     | 26.04214607 | 39.71260805 | 12.37168408 | 0.311530385 | -1.682555211 |
| GPR68    | 5.083680851 | 1.27940068  | 8.887961023 | 6.946972251 | 2.796384335  |
| RRM2     | 16.20701914 | 8.132414301 | 24.28162397 | 2.985782951 | 1.578109294  |
| ITGA3    | 18.92003246 | 9.409149191 | 28.43091573 | 3.021624501 | 1.595324387  |
| RFK      | 9.733830595 | 14.80868142 | 4.658979769 | 0.314611385 | -1.668357217 |
| SH3GL3   | 3.435479823 | 6.3944831   | 0.476476546 | 0.074513692 | -3.746350636 |
| SCARA5   | 3.26896648  | 6.061456413 | 0.476476546 | 0.078607601 | -3.669187371 |
| HPGD     | 8.448879457 | 13.36312686 | 3.534632057 | 0.264506361 | -1.918625677 |
| CCNB1    | 17.53179054 | 8.991356449 | 26.07222462 | 2.899698702 | 1.535903002  |
| MUC21    | 102.2021619 | 159.1277383 | 45.27658547 | 0.284529812 | -1.813348274 |
| SERPINE1 | 5.059309057 | 1.334911544 | 8.783706571 | 6.579991469 | 2.718085714  |
| BBOX1    | 12.43858062 | 18.43872312 | 6.438438124 | 0.34918026  | -1.517956095 |
| AGAP11   | 7.813198563 | 12.34365764 | 3.282739491 | 0.265945442 | -1.910797782 |
| ARPC1B   | 29.21929791 | 14.72734282 | 43.711253   | 2.968033916 | 1.569507578  |
| ALOX12B  | 6.315765897 | 2.133011249 | 10.49852055 | 4.921924603 | 2.299222558  |
| SPRR2F   | 141.2916477 | 62.3768873  | 220.2064081 | 3.530256439 | 1.819772985  |
| ID4      | 12.51892705 | 18.53958017 | 6.498273934 | 0.350508149 | -1.512480108 |
| DEFB103A | 5.870873142 | 1.853610569 | 9.888135716 | 5.334527048 | 2.415360369  |
| DEFB103B | 5.870873142 | 1.853610569 | 9.888135716 | 5.334527048 | 2.415360369  |
| PPP1R1B  | 3.074978059 | 5.698637556 | 0.451318562 | 0.079197625 | -3.658399017 |
| LOR      | 3.231330428 | 5.969953139 | 0.492707717 | 0.082531254 | -3.598915633 |
| CA2      | 10.83441837 | 5.740731743 | 15.92810501 | 2.774577479 | 1.47226809   |
| TNNI2    | 28.01104481 | 41.0466574  | 14.97543222 | 0.364839263 | -1.4546671   |
| PAMR1    | 2.583855729 | 4.93648103  | 0.231230429 | 0.046841146 | -4.416079814 |
| LGI3     | 4.109898686 | 7.287571297 | 0.932226074 | 0.127919994 | -2.966686322 |
| GYS2     | 4.05847893  | 7.147773597 | 0.969184264 | 0.135592468 | -2.882651053 |
| FAM25A   | 637.13595   | 1038.743586 | 235.5283139 | 0.226743459 | -2.140867161 |
| GADD45B  | 15.94532002 | 23.72277923 | 8.167860814 | 0.344304549 | -1.538242851 |
| ACTN1    | 26.71254035 | 13.60570717 | 39.81937353 | 2.926666952 | 1.54925858   |
| SPRR2C   | 57.09311081 | 28.03273375 | 86.15348787 | 3.073317381 | 1.619796762  |
| RNF222   | 13.23840884 | 19.35429932 | 7.122518356 | 0.368007037 | -1.442194739 |
| FCER1A   | 6.801739873 | 10.77870527 | 2.82477448  | 0.262069925 | -1.931976295 |
| HILPDA   | 23.18264189 | 35.44825221 | 10.91703158 | 0.307970941 | -1.699133866 |
| TNFRSF6B | 4.238291083 | 1.03206647  | 7.444515696 | 7.213213404 | 2.850642107  |
| SOD3     | 10.06626113 | 14.82950926 | 5.303012997 | 0.357598684 | -1.483586667 |
| CFH      | 11.21945645 | 16.26129415 | 6.177618745 | 0.379897116 | -1.396319336 |
| TMPRSS4  | 10.75852917 | 5.682555089 | 15.83450325 | 2.786511174 | 1.478459939  |
| SOD2     | 24.43641355 | 12.95394766 | 35.91887943 | 2.772813382 | 1.471350523  |
| IGFL2    | 4.30580366  | 7.431919645 | 1.179687674 | 0.158732566 | -2.655329951 |
| TIMP2    | 26.03470647 | 37.87688134 | 14.19253159 | 0.374701694 | -1.416185596 |
| PLK3     | 17.4183598  | 25.58243381 | 9.254285791 | 0.36174376  | -1.466959965 |
| PELI1    | 18.08086472 | 26.32303081 | 9.838698632 | 0.373767698 | -1.419786201 |
| GSTM2    | 7.795872137 | 11.87170191 | 3.720042365 | 0.313353754 | -1.674135816 |
| SPNS2    | 40.04400971 | 59.23971075 | 20.84830867 | 0.351931304 | -1.506634248 |
| HBP1     | 24.08922466 | 35.24972586 | 12.92872346 | 0.366775149 | -1.447032203 |
| ZNF431   | 10.20105128 | 15.00073798 | 5.40136457  | 0.360073256 | -1.473637645 |
| HS3ST6   | 5.487083668 | 9.047599013 | 1.926568322 | 0.21293697  | -2.231501642 |

|         |              |              |              |              |               |
|---------|--------------|--------------|--------------|--------------|---------------|
| MAFF    | 12. 18295789 | 17. 80552568 | 6. 560390107 | 0. 368446865 | -1. 440471518 |
| ZNF426  | 9. 52280065  | 14. 0815396  | 4. 964061696 | 0. 352522653 | -1. 504212128 |
| SIK1    | 13. 63340084 | 19. 71590726 | 7. 550894417 | 0. 382984882 | -1. 384640651 |
| IL36G   | 5. 429614661 | 1. 999364556 | 8. 859864766 | 4. 431340317 | 2. 147743127  |
| TXNDC5  | 16. 31739823 | 8. 98602487  | 23. 64877159 | 2. 631727814 | 1. 396010286  |
| NNMT    | 4. 422304801 | 1. 27673489  | 7. 567874711 | 5. 927522439 | 2. 567429219  |
| TSC22D2 | 9. 885257563 | 14. 62775445 | 5. 142760673 | 0. 35157554  | -1. 508093392 |
| TTC9    | 16. 24319575 | 23. 47204753 | 9. 014343972 | 0. 384045915 | -1. 380649291 |
| TNNT3   | 3. 14711696  | 5. 611684929 | 0. 682548991 | 0. 121629956 | -3. 039429504 |
| ADH1B   | 8. 375718479 | 12. 60295365 | 4. 148483307 | 0. 329167544 | -1. 603106    |
| ELF3    | 61. 09026118 | 91. 31316729 | 30. 86735507 | 0. 338038379 | -1. 564741043 |
| ODC1    | 15. 31660768 | 8. 406483401 | 22. 22673197 | 2. 643998793 | 1. 402721518  |
| DYNAP   | 4. 079550393 | 1. 010701655 | 7. 14839913  | 7. 072709432 | 2. 822262992  |
| FBX034  | 14. 70089344 | 21. 21260603 | 8. 18918086  | 0. 38605256  | -1. 373130815 |
| CTSL    | 7. 837303904 | 3. 643712904 | 12. 0308949  | 3. 301822954 | 1. 723262764  |
| DIO2    | 36. 23501685 | 19. 95669897 | 52. 51333472 | 2. 631363774 | 1. 395810708  |
| FAM25G  | 8. 818872562 | 13. 12721747 | 4. 510527651 | 0. 343601198 | -1. 541193028 |
| CCL18   | 2. 548735535 | 0. 24733421  | 4. 850136861 | 19. 60964826 | 4. 293491753  |
| SLC04A1 | 13. 00734972 | 18. 65651969 | 7. 358179751 | 0. 394402594 | -1. 342259056 |
| IER3    | 11. 26095567 | 16. 40996641 | 6. 111944937 | 0. 372453227 | -1. 424868835 |
| SLC24A3 | 9. 711712774 | 14. 2414912  | 5. 181934346 | 0. 363861781 | -1. 458537574 |
| GATSL3  | 12. 77190422 | 18. 62667829 | 6. 917130153 | 0. 371356076 | -1. 429124912 |
| RPS4Y1  | 38. 80945492 | 24. 63995154 | 52. 97895829 | 2. 150124289 | 1. 104420058  |
| PLIN1   | 5. 680463251 | 9. 132365068 | 2. 228561434 | 0. 244028947 | -2. 034875801 |
| APOD    | 16. 45783901 | 23. 39033023 | 9. 525347801 | 0. 40723443  | -1. 296068554 |
| SFTA2   | 2. 95528659  | 5. 43188115  | 0. 478692029 | 0. 088126381 | -3. 504282225 |
| ZNF365  | 3. 004437852 | 5. 516167987 | 0. 492707717 | 0. 089320651 | -3. 484862419 |
| COL4A2  | 9. 163678682 | 4. 717922793 | 13. 60943457 | 2. 884624265 | 1. 528383414  |
| FNDC4   | 6. 747117957 | 10. 63987248 | 2. 85436343  | 0. 268270455 | -1. 898239919 |
| VASN    | 10. 118407   | 14. 82364923 | 5. 413164775 | 0. 365170863 | -1. 453356439 |
| PLK1    | 8. 719516186 | 4. 467922793 | 12. 97110958 | 2. 903163322 | 1. 537625735  |
| COL4A1  | 6. 287566421 | 2. 616978014 | 9. 958154828 | 3. 805211498 | 1. 927976642  |
| FAM118A | 6. 995022587 | 10. 76271053 | 3. 227334648 | 0. 299862627 | -1. 737626372 |
| MSN     | 48. 08987426 | 25. 74077652 | 70. 43897199 | 2. 736474245 | 1. 452318278  |
| PAQR8   | 3. 272257657 | 5. 85975084  | 0. 684764474 | 0. 116858975 | -3. 097159561 |
| CYP3A5  | 3. 184992677 | 5. 685220879 | 0. 684764474 | 0. 120446415 | -3. 05353664  |
| GPSM1   | 3. 523587902 | 6. 100934042 | 0. 946241762 | 0. 155097852 | -2. 688749393 |
| FBLN1   | 15. 26091097 | 21. 58220281 | 8. 939619142 | 0. 414212545 | -1. 271556848 |
| BPGM    | 27. 87447353 | 39. 83322308 | 15. 91572399 | 0. 39955903  | -1. 323519434 |
| PHC1    | 13. 29485656 | 18. 89323997 | 7. 696473143 | 0. 407366505 | -1. 295600731 |
| SGK1    | 25. 61893037 | 14. 34111807 | 36. 89674267 | 2. 57279401  | 1. 363335953  |
| AGAP5   | 6. 571439799 | 10. 10538622 | 3. 037493374 | 0. 300581621 | -1. 734171295 |
| PDPN    | 5. 443807978 | 2. 100944779 | 8. 786671177 | 4. 182247561 | 2. 064278462  |
| IGFBP5  | 26. 34226147 | 37. 32868538 | 15. 35583755 | 0. 411368292 | -1. 281497498 |
| KRT1    | 422. 1346912 | 660. 5344661 | 183. 7349163 | 0. 278160983 | -1. 846008025 |
| MIR663A | 12. 18352524 | 18. 05199771 | 6. 315052776 | 0. 349825702 | -1. 515291804 |
| LSP1    | 20. 06463329 | 28. 21195132 | 11. 91731525 | 0. 422420807 | -1. 243247195 |

|           |             |             |             |             |              |
|-----------|-------------|-------------|-------------|-------------|--------------|
| DAPL1     | 34.23789113 | 48.9028995  | 19.57288275 | 0.400239719 | -1.32106375  |
| TMPRSS11E | 300.2096322 | 457.9054291 | 142.5138354 | 0.311229844 | -1.683947685 |
| PLEKHG6   | 16.55221996 | 23.55908789 | 9.545352029 | 0.405166451 | -1.303413375 |
| KLK7      | 95.03094708 | 50.38475243 | 139.6771417 | 2.77221054  | 1.471036829  |
| LAMB2     | 10.58710942 | 14.92783748 | 6.246381367 | 0.418438463 | -1.256912625 |
| RAB31     | 16.28664531 | 9.48268514  | 23.09060549 | 2.435028174 | 1.283938465  |
| MB        | 4.789942606 | 7.686059537 | 1.893825676 | 0.246397477 | -2.020940613 |
| UNC5B-AS1 | 5.326068873 | 8.519496979 | 2.132640767 | 0.250324728 | -1.99812728  |
| FAM25C    | 5.915748335 | 9.189917015 | 2.641579655 | 0.287443254 | -1.79865092  |
| PRELP     | 2.982302362 | 5.282055733 | 0.682548991 | 0.129220331 | -2.952095017 |
| DBP       | 16.43272865 | 23.63477191 | 9.230685381 | 0.390555298 | -1.356401265 |
| RMND5A    | 15.5835909  | 22.0804527  | 9.086729109 | 0.411528207 | -1.280936776 |
| TPX2      | 9.454322786 | 5.273433657 | 13.63521192 | 2.58564207  | 1.370522577  |
| LTB4R2    | 35.35717003 | 19.73875691 | 50.97558315 | 2.582512332 | 1.368775238  |
| TPSAB1    | 3.950259667 | 6.542132682 | 1.358386652 | 0.207636671 | -2.267866832 |
| IGF2      | 4.994511037 | 7.925143931 | 2.063878144 | 0.260421535 | -1.941079343 |
| TNC       | 11.50373128 | 6.784760019 | 16.22270255 | 2.39105031  | 1.257644486  |
| C10orf99  | 119.8964258 | 64.97868607 | 174.8141656 | 2.690330878 | 1.427783618  |
| S100A2    | 745.6323314 | 335.5325111 | 1155.732152 | 3.444471441 | 1.784282616  |
| UBL3      | 21.01617489 | 29.85272246 | 12.17962733 | 0.407990505 | -1.293392516 |
| COX7A1    | 12.04174912 | 17.09258147 | 6.99091677  | 0.409002981 | -1.289816737 |
| TEKT4P2   | 6.889396877 | 10.45332296 | 3.325470797 | 0.318125711 | -1.652331119 |
| PI3       | 484.0284267 | 235.0768548 | 732.9799986 | 3.118044094 | 1.64064133   |
| PLAT      | 5.606633019 | 2.30613557  | 8.907130467 | 3.862362031 | 1.949483399  |
| IL34      | 9.795987899 | 14.22085809 | 5.371117711 | 0.377692941 | -1.404714275 |
| SNX9      | 17.99435641 | 25.20605279 | 10.78266003 | 0.427780586 | -1.225057085 |
| SASH1     | 19.83689848 | 27.71138437 | 11.96241259 | 0.431678635 | -1.211970403 |
| ERO1A     | 101.2996326 | 149.104801  | 53.49446418 | 0.358770904 | -1.478865203 |
| BIRC5     | 8.724223848 | 4.850309335 | 12.59813836 | 2.597388639 | 1.377061896  |
| LINC00265 | 7.241289246 | 10.76475161 | 3.717826882 | 0.345370429 | -1.533783532 |
| SPINK7    | 521.6185089 | 790.194684  | 253.0423339 | 0.320227836 | -1.642829373 |
| CRYAB     | 108.0206015 | 158.7173739 | 57.32382905 | 0.361169213 | -1.469253175 |
| TSC22D3   | 13.35708558 | 18.64915776 | 8.065013394 | 0.432459926 | -1.209361642 |
| MT2A      | 185.7597568 | 98.8590056  | 272.6605081 | 2.758074557 | 1.463661457  |
| PDLIM4    | 18.87887514 | 26.34860401 | 11.40914627 | 0.433007618 | -1.207535687 |
| ADAM33    | 6.487773999 | 9.752644316 | 3.222903681 | 0.330464598 | -1.597432369 |
| MXRA5     | 5.756483633 | 8.755397834 | 2.757569431 | 0.314956497 | -1.666775523 |
| PTN       | 25.74917706 | 36.13269009 | 15.36566403 | 0.425256575 | -1.233594553 |
| BCAM      | 10.66831768 | 14.86573488 | 6.470900466 | 0.435289645 | -1.199952393 |
| KPNA2     | 31.34594695 | 18.53289218 | 44.15900171 | 2.382736665 | 1.252619517  |
| EREG      | 8.258899326 | 12.07824911 | 4.439549545 | 0.367565655 | -1.443926126 |
| MDFI      | 15.13422128 | 9.131778857 | 21.1366637  | 2.314627197 | 1.210779846  |
| SBN02     | 16.4600868  | 9.812900548 | 23.10727306 | 2.354785208 | 1.23559547   |
| PDLIM2    | 15.24485296 | 21.30846318 | 9.181242744 | 0.43087306  | -1.214665195 |
| SCIN      | 4.40032366  | 7.1444831   | 1.656164221 | 0.231810223 | -2.108983903 |
| SYT8      | 67.39434144 | 95.46417376 | 39.32450912 | 0.411929497 | -1.279530657 |
| ARHGAP10  | 10.33856684 | 14.57698896 | 6.100144732 | 0.418477695 | -1.256777368 |

|           |              |              |              |              |               |
|-----------|--------------|--------------|--------------|--------------|---------------|
| MARCKSL1  | 5. 588930058 | 2. 383011249 | 8. 794848867 | 3. 690645132 | 1. 883873024  |
| SRM       | 22. 76944679 | 13. 81496939 | 31. 72392418 | 2. 296344153 | 1. 199338875  |
| ITM2A     | 9. 159586203 | 13. 04419079 | 5. 274981621 | 0. 404393167 | -1. 306169475 |
| ADAMTS1   | 5. 83784793  | 2. 595613199 | 9. 08008266  | 3. 498241827 | 1. 806630024  |
| LY6G6C    | 5. 521128779 | 8. 477402793 | 2. 564854766 | 0. 302551952 | -1. 724745201 |
| MYO1B     | 8. 610957665 | 4. 728624448 | 12. 49329088 | 2. 642056061 | 1. 401661079  |
| ADIRF     | 258. 8589785 | 388. 3435304 | 129. 3744266 | 0. 333144282 | -1. 585780963 |
| ANGPTL1   | 1. 964187309 | 3. 697144189 | 0. 231230429 | 0. 062542984 | -3. 999008141 |
| RUVBL1    | 10. 82097043 | 6. 544836967 | 15. 0971039  | 2. 306719628 | 1. 205842661  |
| CCNB2     | 9. 49269693  | 5. 597643545 | 13. 38775032 | 2. 391676106 | 1. 258022025  |
| DTX2      | 23. 7934981  | 33. 09225607 | 14. 49474013 | 0. 438010032 | -1. 190964183 |
| IFRD1     | 8. 184305475 | 11. 93864613 | 4. 429964823 | 0. 371060904 | -1. 430272093 |
| LOC285074 | 5. 422084403 | 8. 505455595 | 2. 338713212 | 0. 274966248 | -1. 862673556 |
| SLC31A2   | 12. 47547113 | 17. 42807922 | 7. 522863041 | 0. 431651873 | -1. 212059846 |
| LMNB2     | 20. 55671031 | 12. 58430386 | 28. 52911676 | 2. 267039725 | 1. 180809671  |
| C18orf25  | 15. 93304894 | 22. 07837312 | 9. 787724755 | 0. 4433173   | -1. 173588433 |
| KRT78     | 408. 4165026 | 607. 695006  | 209. 1379991 | 0. 34414961  | -1. 538892221 |
| PRSS8     | 43. 48843436 | 61. 24749209 | 25. 72937663 | 0. 420088656 | -1. 251234267 |
| EPHB6     | 6. 648311805 | 9. 812900548 | 3. 483723061 | 0. 35501461  | -1. 494049698 |
| MX2       | 6. 747851431 | 9. 956574957 | 3. 539127904 | 0. 355456361 | -1. 492255641 |
| SPSB3     | 33. 10248552 | 46. 10656696 | 20. 09840409 | 0. 435911962 | -1. 1978913   |
| CCND1     | 36. 92987483 | 50. 76109069 | 23. 09865897 | 0. 455046546 | -1. 135913972 |
| MATN2     | 5. 349183418 | 8. 169812351 | 2. 528554485 | 0. 309499702 | -1. 691990076 |
| BLVRA     | 29. 484914   | 41. 55217724 | 17. 41765076 | 0. 419175406 | -1. 254374022 |
| AGTRAP    | 12. 1600493  | 7. 687251225 | 16. 63284738 | 2. 163692442 | 1. 113495442  |
| TXNIP     | 47. 56737901 | 66. 14997681 | 28. 9847812  | 0. 43816767  | -1. 190445056 |
| AIF1L     | 30. 17336512 | 41. 99095609 | 18. 35577416 | 0. 437136371 | -1. 193844676 |
| AMOTL2    | 12. 22620658 | 16. 71455085 | 7. 737862299 | 0. 462941683 | -1. 111097628 |
| TPPP3     | 120. 7135159 | 170. 3256589 | 71. 10137292 | 0. 417443698 | -1. 260346465 |
| TNFAIP8L3 | 8. 070974662 | 11. 65657966 | 4. 485369667 | 0. 384792949 | -1. 37784573  |
| CEACAM1   | 16. 76966327 | 10. 87117346 | 22. 66815308 | 2. 085161567 | 1. 060159174  |
| PIM1      | 91. 39957625 | 130. 9775409 | 51. 82161161 | 0. 395652654 | -1. 337693662 |
| UPK3B     | 16. 53732645 | 22. 865048   | 10. 20960491 | 0. 446515787 | -1. 16321691  |
| LDHB      | 41. 25909293 | 25. 24751374 | 57. 27067211 | 2. 268368787 | 1. 18165521   |
| SLPI      | 1745. 492354 | 2739. 15842  | 751. 8262885 | 0. 27447346  | -1. 86526144  |
| MGLL      | 56. 11198524 | 78. 76250467 | 33. 46146581 | 0. 424840042 | -1. 235008345 |
| TYMP      | 59. 46787144 | 35. 2218206  | 83. 71392228 | 2. 376763065 | 1. 248998091  |
| APOBEC3A  | 10. 05779899 | 5. 874378435 | 14. 24121955 | 2. 424293857 | 1. 277564583  |
| CHMP4C    | 12. 56639308 | 17. 42008185 | 7. 712704314 | 0. 44274788  | -1. 175442695 |
| DUOXA2    | 13. 21165056 | 17. 86520848 | 8. 55809263  | 0. 479036818 | -1. 06179155  |
| KIF20A    | 5. 152870757 | 2. 350944779 | 7. 954796735 | 3. 383659543 | 1. 758584415  |
| XG        | 8. 154735225 | 11. 63647499 | 4. 672995457 | 0. 401581704 | -1. 316234553 |
| ARSI      | 1. 841658961 | 3. 435856323 | 0. 2474616   | 0. 072023268 | -3. 795393131 |
| KRT4      | 11618. 45881 | 19527. 96312 | 3708. 954501 | 0. 189930434 | -2. 396457    |
| LGALS7    | 354. 7900593 | 523. 0644021 | 186. 5157166 | 0. 3565827   | -1. 487691386 |
| NSG1      | 12. 03655324 | 16. 43868462 | 7. 634421851 | 0. 46441805  | -1. 106504051 |
| KRT8      | 10. 98171565 | 14. 99405    | 6. 969381301 | 0. 464809795 | -1. 105287625 |

|          |              |              |              |              |               |
|----------|--------------|--------------|--------------|--------------|---------------|
| LRRRC59  | 24. 97894007 | 15. 71875924 | 34. 23912089 | 2. 17823305  | 1. 123158317  |
| ZC3H12A  | 7. 716577607 | 4. 292132682 | 11. 14102253 | 2. 59568456  | 1. 376115071  |
| UBE2S    | 22. 11679869 | 14. 0061188  | 30. 22747859 | 2. 158162374 | 1. 109803413  |
| MKI67    | 7. 146007948 | 3. 858980644 | 10. 43303525 | 2. 703572838 | 1. 434867225  |
| FCHO2    | 11. 78171852 | 16. 1144255  | 7. 449011543 | 0. 462257345 | -1. 113231853 |
| LAYN     | 2. 327839553 | 4. 193218249 | 0. 462460858 | 0. 11028781  | -3. 180654753 |
| CADM3    | 2. 583252509 | 4. 483956028 | 0. 682548991 | 0. 152220269 | -2. 715767624 |
| SCEL     | 265. 6109041 | 386. 9135747 | 144. 3082335 | 0. 372972785 | -1. 422857731 |
| LCE3D    | 46. 17405595 | 63. 09325708 | 29. 25485481 | 0. 463676408 | -1. 108809771 |
| YPEL3    | 29. 85846759 | 41. 1836481  | 18. 53328708 | 0. 450015672 | -1. 15195285  |
| IDH3A    | 18. 74868595 | 11. 99875687 | 25. 49861502 | 2. 125104733 | 1. 087533945  |
| RPS6KA4  | 18. 01641083 | 11. 52486705 | 24. 50795461 | 2. 126528185 | 1. 088499976  |
| KLK9     | 3. 999095842 | 1. 584911544 | 6. 41328014  | 4. 046459353 | 2. 016660103  |
| LEPR     | 3. 584597801 | 5. 776724153 | 1. 392471449 | 0. 241048631 | -2. 052603858 |
| SHISA5   | 27. 04438029 | 17. 13379847 | 36. 95496211 | 2. 15684585  | 1. 10892307   |
| LGALS9B  | 7. 984033224 | 4. 600309335 | 11. 36775711 | 2. 471085374 | 1. 305144855  |
| KRT16    | 2350. 509708 | 1004. 266689 | 3696. 752727 | 3. 681046845 | 1. 88011611   |
| TIPARP   | 13. 0865009  | 17. 74743675 | 8. 425565045 | 0. 474748279 | -1. 074765326 |
| KRT14    | 6263. 307242 | 2363. 575733 | 10163. 03875 | 4. 299857461 | 2. 104288836  |
| PLAC9    | 4. 979404692 | 7. 608295968 | 2. 350513417 | 0. 308940849 | -1. 694597454 |
| DCT      | 4. 687572069 | 7. 082908956 | 2. 292235181 | 0. 323629062 | -1. 627586927 |
| B3GNT8   | 10. 82412605 | 15. 09457332 | 6. 553678777 | 0. 434174497 | -1. 203653109 |
| C15orf48 | 86. 89317816 | 122. 1286905 | 51. 6576658  | 0. 422977317 | -1. 241347798 |
| ARHGAP23 | 17. 24366633 | 11. 12644728 | 23. 36088538 | 2. 099581726 | 1. 070101946  |
| TRIP10   | 89. 89350789 | 126. 479077  | 53. 30793878 | 0. 421476343 | -1. 24647644  |
| CRAT     | 6. 852295552 | 10. 26896853 | 3. 435622575 | 0. 334563551 | -1. 579647816 |
| CIART    | 10. 8267486  | 14. 90997715 | 6. 743520051 | 0. 452282387 | -1. 144704281 |
| CTSC     | 6. 879377175 | 3. 776099446 | 9. 982654903 | 2. 64364195  | 1. 402526794  |
| LPIN1    | 20. 77840457 | 28. 16797006 | 13. 38883907 | 0. 475321404 | -1. 073024727 |
| SAMD9    | 15. 77024238 | 21. 23939015 | 10. 30109461 | 0. 484999547 | -1. 043944694 |
| TACC3    | 9. 046775154 | 5. 536801102 | 12. 55674921 | 2. 267870739 | 1. 181338414  |
| VIPR1    | 2. 862404531 | 4. 794798471 | 0. 930010591 | 0. 193962394 | -2. 366151128 |
| BAIAP2L2 | 3. 885872075 | 6. 170984773 | 1. 600759377 | 0. 25940096  | -1. 946744274 |
| CLCA2    | 91. 0427947  | 54. 5146829  | 127. 5709065 | 2. 340120124 | 1. 226582589  |
| NMB      | 3. 560852722 | 1. 334911544 | 5. 786793901 | 4. 334964311 | 2. 116020116  |
| LGALS3   | 105. 5333392 | 148. 4044797 | 62. 6621986  | 0. 422239266 | -1. 243867347 |
| IGFBP3   | 34. 82817948 | 46. 99538048 | 22. 66097849 | 0. 482195872 | -1. 052308793 |
| NPPC     | 1. 712542061 | 3. 193853693 | 0. 231230429 | 0. 072398567 | -3. 787895057 |
| RGS5     | 4. 450497217 | 6. 834900807 | 2. 066093627 | 0. 302285825 | -1. 726014768 |
| PTGES    | 5. 753818946 | 2. 957221138 | 8. 550416754 | 2. 89136874  | 1. 531752609  |
| ALDH3A1  | 153. 2152711 | 215. 079816  | 91. 35072628 | 0. 424729424 | -1. 235384038 |
| MTRNR2L6 | 16. 30887175 | 21. 88377699 | 10. 73396652 | 0. 490498807 | -1. 027678466 |
| THBS1    | 3. 9199355   | 1. 5240691   | 6. 315801899 | 4. 144039071 | 2. 051037605  |
| KIFC3    | 19. 92238252 | 26. 63168668 | 13. 21307837 | 0. 496141252 | -1. 011177179 |
| ECM1     | 462. 0363574 | 677. 9520319 | 246. 1206829 | 0. 363035541 | -1. 461817299 |
| SPINK5   | 690. 1013851 | 1016. 989249 | 363. 213521  | 0. 357145881 | -1. 485414614 |
| LYPD2    | 78. 31342407 | 110. 2983833 | 46. 32846486 | 0. 420028503 | -1. 251440861 |

|           |              |              |              |              |               |
|-----------|--------------|--------------|--------------|--------------|---------------|
| PRDM1     | 14. 79060186 | 20. 16136131 | 9. 419842412 | 0. 467222539 | -1. 097818224 |
| SULF2     | 21. 35179946 | 28. 76901331 | 13. 93458561 | 0. 484360915 | -1. 045845642 |
| ENO3      | 1. 957443835 | 3. 502742781 | 0. 41214489  | 0. 117663476 | -3. 087261538 |
| CHRDL1    | 2. 063548968 | 3. 675779374 | 0. 451318562 | 0. 122781733 | -3. 025832156 |
| EMP1      | 1421. 606444 | 2157. 335731 | 685. 8771566 | 0. 317927871 | -1. 653228598 |
| IFITM3    | 210. 3015291 | 122. 6320646 | 297. 9709937 | 2. 429796763 | 1. 280835647  |
| CTGF      | 8. 996421521 | 12. 35000541 | 5. 64283763  | 0. 456909729 | -1. 130018932 |
| PER1      | 16. 68346206 | 22. 67943563 | 10. 68748849 | 0. 471241377 | -1. 085461874 |
| MXI1      | 15. 29929305 | 20. 7436563  | 9. 854929803 | 0. 475081618 | -1. 073752707 |
| LGALS9C   | 16. 51146819 | 10. 99063328 | 22. 0323031  | 2. 00464364  | 1. 003345795  |
| ADAP2     | 2. 740312725 | 0. 763367445 | 4. 717258005 | 6. 179537829 | 2. 627498942  |
| ARHGAP27  | 15. 76860392 | 21. 17399706 | 10. 36321078 | 0. 489431011 | -1. 03082258  |
| FERMT1    | 11. 94032309 | 7. 751433398 | 16. 12921278 | 2. 080803892 | 1. 057141003  |
| ST3GAL4   | 8. 363511866 | 11. 81836688 | 4. 908656853 | 0. 415341384 | -1. 267630469 |
| PDIA4     | 21. 52183334 | 14. 09703586 | 28. 94663083 | 2. 053384209 | 1. 038003596  |
| THEM5     | 4. 851520684 | 7. 322939001 | 2. 380102367 | 0. 3250201   | -1. 621399154 |
| FTH1      | 673. 2950849 | 999. 8515169 | 346. 7386528 | 0. 346790145 | -1. 527865193 |
| RARRES2   | 7. 159906833 | 10. 18313056 | 4. 136683102 | 0. 406229015 | -1. 299634806 |
| PHACTR4   | 19. 99188086 | 26. 89928178 | 13. 08447993 | 0. 486424881 | -1. 03971107  |
| BGN       | 25. 31824045 | 33. 83954326 | 16. 79693764 | 0. 496370105 | -1. 010511867 |
| MAL       | 1669. 888588 | 2538. 669588 | 801. 1075885 | 0. 315561975 | -1. 664004724 |
| F3        | 52. 08598845 | 71. 43854723 | 32. 73342967 | 0. 458204022 | -1. 125937972 |
| MCAM      | 12. 61133088 | 8. 167146561 | 17. 0555152  | 2. 088307718 | 1. 062334313  |
| ZNF273    | 8. 305144301 | 11. 53023713 | 5. 080051472 | 0. 440585169 | -1. 182507164 |
| ECHDC2    | 28. 50255346 | 38. 58197162 | 18. 4231353  | 0. 47750632  | -1. 066408266 |
| PYGL      | 42. 28255753 | 27. 79526898 | 56. 76984607 | 2. 042428375 | 1. 030285486  |
| MYBL2     | 5. 918707837 | 3. 169823088 | 8. 667592586 | 2. 734408939 | 1. 451229018  |
| TMPRSS11E | 64. 99526503 | 90. 09024239 | 39. 90028767 | 0. 442892444 | -1. 174971709 |
| NDUFA4L2  | 65. 58799826 | 90. 81064269 | 40. 36535383 | 0. 444500255 | -1. 169743848 |
| BNIP3L    | 17. 61415433 | 23. 7563883  | 11. 47192035 | 0. 482898335 | -1. 050208606 |
| C14orf132 | 3. 069932734 | 4. 978624448 | 1. 16124102  | 0. 233245354 | -2. 100079752 |
| DDX21     | 20. 29473661 | 13. 33434235 | 27. 25513087 | 2. 043980134 | 1. 031381174  |
| TMEM173   | 12. 14310901 | 7. 996688029 | 16. 28952999 | 2. 037034573 | 1. 026470467  |
| EPS8L1    | 111. 2513299 | 153. 3610697 | 69. 14159006 | 0. 450841861 | -1. 149306618 |
| SLC6A9    | 17. 17337185 | 22. 97892171 | 11. 36782199 | 0. 494706503 | -1. 015355232 |
| FAM221A   | 3. 832698526 | 6. 025464003 | 1. 63993305  | 0. 272167098 | -1. 877435425 |
| FALEC     | 3. 928152267 | 6. 163182125 | 1. 69312241  | 0. 274715622 | -1. 863989143 |
| CD207     | 3. 834005628 | 6. 007351189 | 1. 660660068 | 0. 276437987 | -1. 854972218 |
| ATP1A1    | 77. 38789649 | 48. 15284174 | 106. 6229512 | 2. 214260828 | 1. 146825174  |
| DLGAP5    | 4. 451713654 | 2. 100944779 | 6. 802482528 | 3. 237820716 | 1. 695023103  |
| AURKA     | 4. 096590966 | 1. 850944779 | 6. 342237153 | 3. 426486422 | 1. 77672997   |
| CLDN4     | 89. 0435067  | 124. 029282  | 54. 05773137 | 0. 435846523 | -1. 198107893 |
| PTGDS     | 6. 733993226 | 9. 585476281 | 3. 882510171 | 0. 405040924 | -1. 303860414 |
| FBXO32    | 2. 819631038 | 4. 709251484 | 0. 930010591 | 0. 197485863 | -2. 340178716 |
| DKK4      | 2. 879704276 | 4. 804239976 | 0. 955168575 | 0. 198817832 | -2. 330480938 |
| FZD7      | 2. 734738741 | 4. 539466892 | 0. 930010591 | 0. 204872205 | -2. 287203828 |
| BOC       | 8. 851907672 | 11. 98931537 | 5. 714499978 | 0. 476632719 | -1. 069050106 |



|           |             |             |             |             |              |
|-----------|-------------|-------------|-------------|-------------|--------------|
| ANXA3     | 32.30629387 | 43.66458534 | 20.94800239 | 0.479748112 | -1.059650965 |
| WDR26     | 25.45063877 | 34.1040596  | 16.79721794 | 0.492528401 | -1.021721177 |
| SLC6A14   | 2.646165652 | 0.798099705 | 4.494231599 | 5.631165592 | 2.493433576  |
| CNFN      | 1859.479545 | 2803.376884 | 915.5822065 | 0.326599756 | -1.614404382 |
| LTC4S     | 1.594225783 | 2.957221138 | 0.231230429 | 0.078191795 | -3.676838962 |
| PADI3     | 3.387051329 | 5.353599832 | 1.420502826 | 0.265336011 | -1.914107604 |
| GSN       | 114.6110884 | 157.3449573 | 71.87721951 | 0.456812984 | -1.130324437 |
| RNASE4    | 4.049237705 | 6.254685399 | 1.843790011 | 0.294785412 | -1.762262964 |
| POLB      | 10.36738739 | 6.788831448 | 13.94594333 | 2.054247985 | 1.038610352  |
| NDRG4     | 8.764331183 | 12.16868695 | 5.359975414 | 0.440472784 | -1.182875216 |
| GABARAPL1 | 6.48704616  | 9.254049955 | 3.720042365 | 0.401990737 | -1.314765836 |
| GPRC5A    | 29.95041037 | 40.34859959 | 19.55222115 | 0.484582398 | -1.045186093 |
| VWA1      | 5.241365504 | 2.749364556 | 7.733366451 | 2.812783206 | 1.491998362  |
| BCL6      | 6.931141539 | 4.100309335 | 9.761973743 | 2.380789581 | 1.251440118  |
| MUC1      | 15.06784523 | 9.993153579 | 20.14253687 | 2.015633675 | 1.011233464  |
| BLNK      | 25.16286634 | 33.55654611 | 16.76918656 | 0.499729219 | -1.000781522 |
| RIOK3     | 41.90556352 | 56.42043243 | 27.39069461 | 0.485474737 | -1.042531871 |
| SMDT1     | 12.99419447 | 17.3619052  | 8.626483734 | 0.496862737 | -1.009080747 |
| CDKN3     | 6.426805886 | 3.762732001 | 9.090879771 | 2.416031694 | 1.27263938   |
| ANLN      | 10.18105001 | 6.717961288 | 13.64413873 | 2.030993949 | 1.022185942  |
| TCAP      | 2.750538515 | 4.470714806 | 1.030362224 | 0.230469236 | -2.117353911 |
| PPOX      | 5.820125656 | 8.373742992 | 3.26650832  | 0.390089393 | -1.358123325 |
| PLA2G4E-A | 2.151415171 | 0.513367445 | 3.789462896 | 7.38158006  | 2.883929665  |
| C4orf3    | 51.47819514 | 69.97295858 | 32.98343169 | 0.471373976 | -1.085055984 |
| NUCB2     | 58.74718227 | 79.5544619  | 37.93990264 | 0.476904774 | -1.068226871 |
| TSTA3     | 53.83991483 | 35.7851813  | 71.89464837 | 2.009062013 | 1.006522096  |
| HDAC5     | 8.093760829 | 11.07500784 | 5.112513814 | 0.461626203 | -1.115202979 |
| SNORA40   | 5.699628477 | 3.185856323 | 8.213400632 | 2.578082562 | 1.366298466  |
| NCOA7     | 5.71521361  | 3.130345459 | 8.300081762 | 2.651490665 | 1.406803669  |
| PRDX6     | 110.2142933 | 151.4046039 | 69.0239828  | 0.455890911 | -1.133239448 |
| LNX1      | 5.307024461 | 7.798859164 | 2.815189758 | 0.36097456  | -1.470030928 |
| SPINT1    | 84.56813107 | 116.1283164 | 53.00794573 | 0.456460124 | -1.131439261 |
| TOM1      | 33.13034189 | 44.27266957 | 21.98801422 | 0.496649839 | -1.009699051 |
| CCNA2     | 7.967580469 | 5.023433657 | 10.91172728 | 2.172165102 | 1.119133764  |
| RANBP9    | 37.82737322 | 50.63366982 | 25.02107663 | 0.494158861 | -1.016953183 |
| NINL      | 2.628437766 | 4.326864942 | 0.930010591 | 0.214938669 | -2.218003038 |
| CTSF      | 2.612404531 | 4.294798471 | 0.930010591 | 0.216543476 | -2.207271385 |
| ABTB2     | 2.598016545 | 4.266022498 | 0.930010591 | 0.218004146 | -2.197572523 |
| POLR3G    | 1.621719214 | 0.24733421  | 2.996104219 | 12.11358598 | 3.598554103  |
| FAM45B    | 7.219128737 | 10.03345064 | 4.404806839 | 0.43901216  | -1.187667193 |
| WNT4      | 7.260948424 | 10.08300521 | 4.438891636 | 0.440234984 | -1.1836543   |
| SMIM5     | 5.604582402 | 8.146513446 | 3.062651358 | 0.375946272 | -1.4114016   |
| ABLIM3    | 7.781075579 | 10.74145271 | 4.820698453 | 0.4487939   | -1.155875028 |
| GABARAPL2 | 41.07996614 | 54.87620943 | 27.28372286 | 0.497186725 | -1.008140318 |
| LTB4R     | 50.24800527 | 33.07770768 | 67.41830286 | 2.038179414 | 1.027281053  |
| RNASEK    | 77.8313847  | 104.8135606 | 50.84920877 | 0.485139599 | -1.043528152 |
| KLK5      | 137.49438   | 87.45591982 | 187.5328401 | 2.144312707 | 1.10051531   |

|          |              |              |              |              |               |
|----------|--------------|--------------|--------------|--------------|---------------|
| FOXM1    | 8. 23972948  | 5. 347643545 | 11. 13181541 | 2. 081630034 | 1. 057713683  |
| BCAS1    | 2. 319886631 | 3. 929850804 | 0. 709922458 | 0. 180648705 | -2. 468741183 |
| SERPINB7 | 2. 355757648 | 3. 985361667 | 0. 726153629 | 0. 182205202 | -2. 456363942 |
| KRT10    | 65. 43164066 | 89. 00495858 | 41. 85832274 | 0. 470292031 | -1. 088371209 |
| TM4SF1   | 127. 9913504 | 173. 8665146 | 82. 11618626 | 0. 472294429 | -1. 082241576 |
| OSBPL1A  | 5. 670187992 | 8. 113041337 | 3. 227334648 | 0. 397795908 | -1. 329899658 |
| FBLN2    | 5. 549398496 | 7. 915066982 | 3. 183730009 | 0. 402236648 | -1. 313883564 |
| SNX21    | 9. 190079115 | 12. 28222898 | 6. 097929249 | 0. 496483925 | -1. 010181088 |
| SPRR2G   | 7. 953385546 | 4. 800803991 | 11. 1059671  | 2. 313355664 | 1. 209987088  |
| FABP3    | 1. 40515386  | 2. 604235276 | 0. 206072445 | 0. 079129734 | -3. 659636281 |
| LY6K     | 1. 609953065 | 2. 974660012 | 0. 245246117 | 0. 082445092 | -3. 600422585 |
| AADACL2  | 1. 413421814 | 2. 595613199 | 0. 231230429 | 0. 089085088 | -3. 488672239 |
| RPTN     | 1. 736924626 | 2. 997372705 | 0. 476476546 | 0. 158964731 | -2. 653221379 |
| ARG2     | 8. 184931925 | 11. 25956552 | 5. 110298331 | 0. 453862835 | -1. 139671737 |
| FHL1     | 6. 613309291 | 9. 204583106 | 4. 022035477 | 0. 436960092 | -1. 194426573 |
| SUSD4    | 9. 569573203 | 12. 86317609 | 6. 275970318 | 0. 487902076 | -1. 035336473 |
| SLC43A3  | 9. 418962609 | 6. 207259633 | 12. 63066558 | 2. 034821537 | 1. 024902269  |
| ADAMTS14 | 2. 800292888 | 4. 423113584 | 1. 177472191 | 0. 266208898 | -1. 909369303 |
| KRT7     | 7. 025829063 | 4. 328270581 | 9. 723387545 | 2. 246483292 | 1. 167668332  |
| HAS3     | 5. 219793434 | 2. 954555348 | 7. 485031519 | 2. 5333868   | 1. 341067366  |
| CALB2    | 3. 791781551 | 5. 869778556 | 1. 713784547 | 0. 291967496 | -1. 776120328 |
| COL14A1  | 3. 407762077 | 5. 205180055 | 1. 610344099 | 0. 309373371 | -1. 692579072 |
| DUSP1    | 63. 54406263 | 84. 77408127 | 42. 31404399 | 0. 499138927 | -1. 002486673 |
| LDHA     | 170. 8577944 | 110. 6872612 | 231. 0283276 | 2. 08721695  | 1. 061580565  |
| PKMYT1   | 4. 856474933 | 2. 614312224 | 7. 098637642 | 2. 71529834  | 1. 441110721  |
| CHP1     | 81. 95307478 | 110. 4748518 | 53. 4312978  | 0. 483651229 | -1. 047961031 |
| WNT5A    | 6. 279852236 | 8. 798272952 | 3. 76143152  | 0. 427519303 | -1. 225938534 |
| MIEF2    | 4. 477435323 | 6. 618372916 | 2. 336497729 | 0. 353032046 | -1. 502128949 |
| SCNN1D   | 2. 472932681 | 0. 840243124 | 4. 105622238 | 4. 886231285 | 2. 288722154  |
| OSMR     | 5. 843744437 | 3. 375013879 | 8. 312474995 | 2. 462945425 | 1. 300384661  |
| COMP     | 2. 436357074 | 3. 933776744 | 0. 938937404 | 0. 238685992 | -2. 066814195 |
| NIPAL4   | 7. 9381155   | 5. 171853434 | 10. 70437757 | 2. 069737224 | 1. 049447613  |
| LYAR     | 6. 783807031 | 4. 215257003 | 9. 35235706  | 2. 218692016 | 1. 149709416  |
| MYBPH    | 1. 360101774 | 0. 24733421  | 2. 472869338 | 9. 998088567 | 3. 321652307  |
| GGTA1P   | 6. 534725454 | 9. 107035817 | 3. 96241509  | 0. 43509383  | -1. 200601538 |
| HEBP2    | 90. 48009446 | 121. 7899174 | 59. 17027152 | 0. 485838834 | -1. 041450282 |
| TEAD4    | 2. 674480677 | 1. 010701655 | 4. 338259699 | 4. 29232472  | 2. 101759222  |
| CYSRT1   | 92. 70269113 | 124. 3462497 | 61. 05913253 | 0. 491041207 | -1. 026083998 |
| TRAPPC6A | 3. 773854958 | 5. 703919904 | 1. 843790011 | 0. 323249632 | -1. 629279366 |
| TPSB2    | 3. 700837364 | 5. 552795841 | 1. 848878886 | 0. 332963599 | -1. 586563632 |
| ISLR     | 3. 67778974  | 5. 499989263 | 1. 855590216 | 0. 337380698 | -1. 567550658 |
| PPDPF    | 273. 2302915 | 377. 541105  | 168. 919478  | 0. 447420097 | -1. 160298033 |
| KRT2     | 3. 232877369 | 5. 020093927 | 1. 44566081  | 0. 287974853 | -1. 79598526  |
| CX3CL1   | 3. 041285234 | 4. 715257003 | 1. 367313465 | 0. 289976445 | -1. 785992379 |
| CRIP1    | 284. 4433497 | 390. 2466466 | 178. 6400529 | 0. 457761917 | -1. 127330652 |
| SYT15    | 4. 608220577 | 6. 687886669 | 2. 528554485 | 0. 378079745 | -1. 403237534 |
| OLFM2    | 4. 612086532 | 6. 656444906 | 2. 567728158 | 0. 385750681 | -1. 37425939  |

|           |              |              |              |              |               |
|-----------|--------------|--------------|--------------|--------------|---------------|
| FETUB     | 4. 570022696 | 6. 552248125 | 2. 587797267 | 0. 394947996 | -1. 340265393 |
| SLIT3     | 2. 039463843 | 3. 396378694 | 0. 682548991 | 0. 200963748 | -2. 314992821 |
| CRTAC1    | 2. 124010023 | 3. 510066211 | 0. 737953834 | 0. 210239292 | -2. 249895774 |
| CEP55     | 6. 066680388 | 3. 685856323 | 8. 447504453 | 2. 29187025  | 1. 196525371  |
| PRDX5     | 174. 2021536 | 236. 1801786 | 112. 2241286 | 0. 475163196 | -1. 073504998 |
| ABI3BP    | 3. 912185563 | 5. 776724153 | 2. 047646973 | 0. 354465077 | -1. 496284598 |
| FLNC      | 1. 689841324 | 0. 49466842  | 2. 885014228 | 5. 832218331 | 2. 544044728  |
| IL1RN     | 834. 3499485 | 1182. 845386 | 485. 8545112 | 0. 41075065  | -1. 283665236 |
| LOC101928 | 3. 465151454 | 5. 315527843 | 1. 614775065 | 0. 303784518 | -1. 718879747 |
| GPAT3     | 3. 389231539 | 5. 122298857 | 1. 656164221 | 0. 323324403 | -1. 628945695 |
| SCARNA17  | 3. 31100855  | 4. 979210659 | 1. 642806441 | 0. 329933107 | -1. 599754545 |
| H1FO      | 102. 5421262 | 137. 2184396 | 67. 86581283 | 0. 49458231  | -1. 015717456 |
| NCCRP1    | 187. 1663577 | 253. 4169305 | 120. 9157849 | 0. 477141699 | -1. 06751032  |
| PLAU      | 4. 105205708 | 2. 116978014 | 6. 093433402 | 2. 878364046 | 1. 525249071  |
| LAMB4     | 4. 960862076 | 6. 941851105 | 2. 979873047 | 0. 429262023 | -1. 220069553 |
| CNTFR     | 1. 303891359 | 2. 401710274 | 0. 206072445 | 0. 085802375 | -3. 542838613 |
| ANKRD33B  | 1. 328192548 | 2. 425154668 | 0. 231230429 | 0. 095346673 | -3. 390673591 |
| PCOLCE2   | 1. 314128683 | 2. 383011249 | 0. 245246117 | 0. 102914377 | -3. 280483562 |
| BCAR1     | 3. 662643757 | 1. 850944779 | 5. 474342735 | 2. 957593764 | 1. 564423907  |
| PLEK2     | 6. 382335069 | 4. 026099446 | 8. 738570691 | 2. 170480587 | 1. 118014519  |
| LTBP1     | 2. 917766515 | 1. 27940068  | 4. 556132349 | 3. 561145793 | 1. 832341501  |
| CRNN      | 2704. 060357 | 3928. 482127 | 1479. 638586 | 0. 376643838 | -1. 408727168 |
| ADSSL1    | 3. 741741877 | 5. 570273211 | 1. 913210543 | 0. 34346799  | -1. 541752444 |
| CAPS      | 3. 659160234 | 5. 4331413   | 1. 885179167 | 0. 346977754 | -1. 527084925 |
| MELK      | 5. 941616693 | 3. 683190533 | 8. 200042853 | 2. 226342292 | 1. 154675419  |
| PRR11     | 5. 984464928 | 3. 704555348 | 8. 264374509 | 2. 230868143 | 1. 157605245  |
| SMCO4     | 4. 581035235 | 6. 594342311 | 2. 567728158 | 0. 38938351  | -1. 360736305 |
| ADAMTS4   | 1. 409872852 | 0. 266033235 | 2. 55371247  | 9. 599223454 | 3. 262917701  |
| PTHLH     | 1. 441227453 | 0. 266033235 | 2. 616421671 | 9. 83494288  | 3. 297916674  |
| DDAH1     | 2. 420581185 | 3. 911151779 | 0. 930010591 | 0. 237784326 | -2. 072274472 |
| CYSLTR1   | 2. 288346621 | 3. 685856323 | 0. 890836919 | 0. 241690625 | -2. 048766581 |
| GADD45G   | 2. 397487096 | 3. 823574445 | 0. 971399747 | 0. 254055403 | -1. 976784948 |
| GBP1P1    | 2. 944040666 | 4. 520767867 | 1. 367313465 | 0. 302451598 | -1. 725223812 |
| CRLF1     | 2. 924149873 | 4. 441812609 | 1. 406487137 | 0. 316647113 | -1. 659052171 |
| CYP2C9    | 5. 810841405 | 8. 080339423 | 3. 541343387 | 0. 438266662 | -1. 190119154 |
| TGM5      | 5. 765944997 | 7. 992762089 | 3. 539127904 | 0. 442791599 | -1. 175300245 |
| LHFP      | 5. 562292129 | 7. 691177166 | 3. 433407092 | 0. 44640853  | -1. 1635635   |
| HOPX      | 375. 2887473 | 516. 1050462 | 234. 4724484 | 0. 454311482 | -1. 138246327 |
| CSTA      | 3583. 312979 | 5247. 327934 | 1919. 298023 | 0. 365766738 | -1. 451004209 |
| RFX2      | 4. 609760644 | 6. 537425808 | 2. 682095479 | 0. 410267827 | -1. 285362073 |
| AKR1B15   | 4. 217900495 | 2. 417157298 | 6. 018643691 | 2. 489967739 | 1. 31612705   |
| CDCA5     | 4. 262916426 | 2. 348278989 | 6. 177553864 | 2. 630672885 | 1. 395431866  |
| AKR1B10   | 178. 9051835 | 117. 2779749 | 240. 5323922 | 2. 050959631 | 1. 036299096  |
| HLA-DQA1  | 5. 834727701 | 7. 995233158 | 3. 674222243 | 0. 459551607 | -1. 121701213 |
| GSTM3     | 5. 748340709 | 7. 847682041 | 3. 648999378 | 0. 464977985 | -1. 104765685 |
| GINS2     | 5. 158673519 | 3. 111646434 | 7. 205700605 | 2. 31571959  | 1. 211460568  |
| PLIN2     | 3. 897867019 | 2. 175154668 | 5. 620579371 | 2. 583990672 | 1. 369600862  |

|           |              |              |              |              |               |
|-----------|--------------|--------------|--------------|--------------|---------------|
| BUB1      | 3. 869985402 | 2. 100944779 | 5. 639026025 | 2. 684042951 | 1. 424407758  |
| KRT6C     | 2592. 878423 | 1454. 81404  | 3730. 942807 | 2. 56454963  | 1. 358705491  |
| OBFC1     | 6. 334665169 | 8. 718057545 | 3. 951272794 | 0. 453228575 | -1. 141689274 |
| CSRNP1    | 6. 287170923 | 8. 623069053 | 3. 951272794 | 0. 45822117  | -1. 12588398  |
| ARHGAP30  | 6. 117333321 | 8. 227989004 | 4. 006677637 | 0. 486957097 | -1. 038133425 |
| USP2      | 5. 118644701 | 7. 216027199 | 3. 021262203 | 0. 418687752 | -1. 256053381 |
| OSR1      | 1. 90778012  | 3. 133011249 | 0. 682548991 | 0. 217857179 | -2. 198545443 |
| PLA2G4D   | 1. 935707695 | 3. 135677039 | 0. 735738351 | 0. 234634608 | -2. 091512275 |
| LFNG      | 3. 202346132 | 4. 792132682 | 1. 612559582 | 0. 336501447 | -1. 571315386 |
| IL11RA    | 3. 181274423 | 4. 749989263 | 1. 612559582 | 0. 339486995 | -1. 558571785 |
| FGL2      | 3. 218227389 | 4. 784721523 | 1. 651733255 | 0. 345209903 | -1. 534454242 |
| KRT6B     | 2144. 796455 | 1236. 821153 | 3052. 771757 | 2. 468240254 | 1. 303482831  |
| SNHG17    | 5. 853275977 | 3. 699223768 | 8. 007328187 | 2. 164596869 | 1. 114098365  |
| HMMR      | 3. 197702157 | 1. 603610569 | 4. 791793744 | 2. 988128064 | 1. 57924198   |
| LPCAT1    | 3. 186966739 | 1. 52673489  | 4. 847198588 | 3. 17487903  | 1. 666701623  |
| HSF4      | 5. 194967278 | 7. 098268252 | 3. 291666304 | 0. 463728079 | -1. 108649008 |
| B3GNT3    | 2. 112397734 | 0. 798099705 | 3. 426695762 | 4. 29356851  | 2. 102177212  |
| KIAA1147  | 4. 41012483  | 6. 275464003 | 2. 544785657 | 0. 405513545 | -1. 302177989 |
| CBR3-AS1  | 4. 519166337 | 6. 42921536  | 2. 609117313 | 0. 405822043 | -1. 301080864 |
| STAC      | 1. 631870522 | 2. 810207    | 0. 453534045 | 0. 161388127 | -2. 631393646 |
| MPZ       | 1. 51418432  | 2. 574834595 | 0. 453534045 | 0. 176141041 | -2. 505197001 |
| RHCG      | 1374. 807176 | 1934. 075887 | 815. 5384651 | 0. 421668286 | -1. 245819574 |
| NOXA1     | 5. 829701526 | 7. 881740362 | 3. 777662691 | 0. 479292963 | -1. 061020337 |
| CTIF      | 4. 716880305 | 6. 602339681 | 2. 831420929 | 0. 428851145 | -1. 221451124 |
| MYL1      | 2. 606240527 | 3. 976046386 | 1. 236434669 | 0. 310970886 | -1. 685148576 |
| DUSP4     | 1. 167169163 | 2. 128265881 | 0. 206072445 | 0. 096826457 | -3. 368454884 |
| GPD1      | 1. 161525229 | 2. 116978014 | 0. 206072445 | 0. 097342742 | -3. 360782775 |
| TAS1R3    | 1. 354377084 | 2. 461292567 | 0. 2474616   | 0. 100541319 | -3. 314139579 |
| LYVE1     | 1. 164754709 | 2. 098278989 | 0. 231230429 | 0. 11020004  | -3. 181803344 |
| KIF2C     | 3. 788751499 | 2. 100944779 | 5. 476558219 | 2. 60671212  | 1. 382231263  |
| NDC80     | 3. 788751499 | 2. 100944779 | 5. 476558219 | 2. 60671212  | 1. 382231263  |
| LOC101927 | 1. 241397232 | 0. 266033235 | 2. 216761229 | 8. 332647716 | 3. 058774988  |
| MTHFD1L   | 1. 277215239 | 0. 266033235 | 2. 288397243 | 8. 601922398 | 3. 104659116  |
| DCBLD1    | 1. 287452563 | 0. 24733421  | 2. 327570916 | 9. 410630721 | 3. 234291419  |
| CDH16     | 2. 345516068 | 3. 758806061 | 0. 932226074 | 0. 248011219 | -2. 011522709 |
| VMAC      | 3. 752846943 | 5. 414442275 | 2. 091251612 | 0. 386235831 | -1. 372446086 |
| CAMK1D    | 3. 784155976 | 5. 437886669 | 2. 130425284 | 0. 391774491 | -1. 351904629 |
| RARRES3   | 6. 000696054 | 8. 050119314 | 3. 951272794 | 0. 490834066 | -1. 026692713 |
| SESN2     | 5. 055222587 | 7. 058936112 | 3. 051509062 | 0. 432290222 | -1. 209927889 |
| AAMDC     | 4. 934135152 | 6. 847008101 | 3. 021262203 | 0. 441252903 | -1. 180322324 |
| CNST      | 4. 841200056 | 6. 688511376 | 2. 993888735 | 0. 447616602 | -1. 159664548 |
| FAM189A2  | 4. 83429118  | 6. 672478141 | 2. 996104219 | 0. 449024209 | -1. 155134866 |
| TTK       | 3. 424405484 | 1. 850944779 | 4. 997866189 | 2. 700170338 | 1. 433050421  |
| SMPD1     | 6. 347081136 | 8. 495427879 | 4. 198734394 | 0. 494234599 | -1. 016732083 |
| LOC728392 | 4. 00056897  | 5. 64840904  | 2. 3527289   | 0. 416529483 | -1. 263509477 |
| ACSF2     | 3. 947106669 | 5. 555500127 | 2. 338713212 | 0. 420972578 | -1. 248201834 |
| TREX2     | 3. 145602908 | 4. 635041595 | 1. 656164221 | 0. 357313777 | -1. 484736552 |

|           |              |              |              |              |               |
|-----------|--------------|--------------|--------------|--------------|---------------|
| SLC16A2   | 3. 022649904 | 4. 430524743 | 1. 614775065 | 0. 364465872 | -1. 456144364 |
| LONRF1    | 5. 086529623 | 6. 961955769 | 3. 211103476 | 0. 461235834 | -1. 116423492 |
| ADA       | 3. 121035461 | 1. 600944779 | 4. 641126143 | 2. 898992023 | 1. 535551364  |
| SLC16A9   | 4. 494342934 | 2. 688522113 | 6. 300163756 | 2. 343355751 | 1. 22857599   |
| STEAP1    | 2. 74299788  | 1. 337577334 | 4. 148418426 | 3. 101441929 | 1. 632939112  |
| FMNL2     | 2. 724047909 | 1. 27673489  | 4. 171360927 | 3. 267209942 | 1. 708059161  |
| ALDH3B1   | 5. 719631236 | 7. 897919085 | 3. 541343387 | 0. 448389424 | -1. 157175846 |
| SYNGR1    | 5. 415464549 | 7. 330974866 | 3. 499954232 | 0. 477420029 | -1. 066669003 |
| ELOVL4    | 5. 498677835 | 7. 441996594 | 3. 555359075 | 0. 477742637 | -1. 065694457 |
| SH3YL1    | 5. 370018866 | 7. 254099188 | 3. 485938544 | 0. 480547406 | -1. 057249336 |
| MAD2L1    | 5. 971597088 | 3. 949223768 | 7. 993970408 | 2. 024187759 | 1. 017343117  |
| DDX3Y     | 2. 032294835 | 0. 972629666 | 3. 091960004 | 3. 17896946  | 1. 668559157  |
| PLAC8     | 2. 484340237 | 1. 087577334 | 3. 881103139 | 3. 568576706 | 1. 835348783  |
| NAV1      | 2. 36537201  | 1. 010701655 | 3. 720042365 | 3. 680653283 | 1. 879961854  |
| CSRP3     | 1. 813508429 | 0. 74200263  | 2. 885014228 | 3. 888145554 | 1. 959082228  |
| MYO15B    | 2. 447922646 | 3. 720588583 | 1. 175256708 | 0. 315879244 | -1. 662554953 |
| SAMD5     | 2. 42098185  | 3. 664491508 | 1. 177472191 | 0. 321319394 | -1. 637920033 |
| LRRC20    | 4. 423353631 | 6. 221358778 | 2. 625348484 | 0. 421989565 | -1. 244720771 |
| CHPT1     | 4. 212247836 | 5. 879710015 | 2. 544785657 | 0. 432808021 | -1. 208200858 |
| GOLGA6L4  | 4. 194531792 | 5. 837566597 | 2. 551496987 | 0. 437082292 | -1. 194023166 |
| ZNF812    | 4. 17773601  | 2. 438522113 | 5. 916949907 | 2. 42644915  | 1. 278846626  |
| EPPK1     | 4. 02176664  | 2. 284770755 | 5. 758762525 | 2. 520499053 | 1. 333709412  |
| ZNRF1     | 5. 867410322 | 7. 973389125 | 3. 76143152  | 0. 471748144 | -1. 083911253 |
| AMY2B     | 3. 346672542 | 4. 808165917 | 1. 885179167 | 0. 392078643 | -1. 350785037 |
| SLC16A5   | 4. 456097363 | 6. 124378435 | 2. 787816291 | 0. 455199874 | -1. 135427937 |
| LOC101927 | 4. 403709959 | 5. 883635956 | 2. 923783962 | 0. 496934886 | -1. 008871269 |
| FAM111B   | 3. 63285487  | 2. 100944779 | 5. 164764962 | 2. 458305908 | 1. 297664454  |
| NCAPG     | 3. 665020699 | 2. 100944779 | 5. 229096618 | 2. 488926254 | 1. 315523484  |
| AGFG2     | 6. 024744299 | 8. 114446976 | 3. 935041623 | 0. 484942675 | -1. 044113878 |
| SPRR3     | 12846. 31121 | 19069. 60958 | 6623. 012846 | 0. 347307207 | -1. 525715746 |
| TRIP13    | 4. 600834052 | 2. 861646434 | 6. 34002167  | 2. 215515374 | 1. 147642338  |
| PLIN4     | 3. 519255743 | 5. 016022498 | 2. 022488989 | 0. 403205725 | -1. 310411971 |
| RORA      | 3. 688244303 | 5. 246063323 | 2. 130425284 | 0. 406099803 | -1. 300093766 |
| CBX7      | 3. 574708764 | 5. 058165917 | 2. 091251612 | 0. 413440691 | -1. 274247709 |
| TNNT2     | 3. 61020265  | 5. 071533362 | 2. 148871938 | 0. 423712472 | -1. 238842499 |
| ADIPOQ    | 4. 669871784 | 6. 364301487 | 2. 975442081 | 0. 467520605 | -1. 096898145 |
| MACROD1   | 4. 736258158 | 6. 451254114 | 3. 021262203 | 0. 468321686 | -1. 094428251 |
| SECISBP2L | 4. 743798676 | 6. 441177166 | 3. 046420187 | 0. 472960161 | -1. 08020943  |
| RUSC2     | 2. 7616658   | 4. 139786964 | 1. 383544636 | 0. 334206723 | -1. 581187338 |
| ALOX5     | 2. 785152353 | 4. 163817569 | 1. 406487137 | 0. 337787887 | -1. 565810501 |
| CCDC74A   | 1. 429895876 | 2. 422488878 | 0. 437302874 | 0. 180518011 | -2. 469785307 |
| PKIB      | 1. 526358391 | 2. 576240235 | 0. 476476546 | 0. 184950355 | -2. 434790025 |
| MYOZ1     | 1. 398141759 | 2. 358980644 | 0. 437302874 | 0. 185377898 | -2. 431458846 |
| BARX1     | 1. 4184978   | 2. 385677039 | 0. 451318562 | 0. 189178399 | -2. 402180731 |
| SCN4B     | 1. 407815393 | 2. 364312224 | 0. 451318562 | 0. 190887886 | -2. 389202546 |
| Clorf204  | 1. 450815607 | 2. 425154668 | 0. 476476546 | 0. 196472643 | -2. 347599653 |
| NOV       | 1. 368044659 | 2. 284770755 | 0. 451318562 | 0. 197533412 | -2. 339831398 |

|           |              |              |              |              |               |
|-----------|--------------|--------------|--------------|--------------|---------------|
| PI16      | 1. 419385612 | 2. 348278989 | 0. 490492234 | 0. 208873067 | -2. 259301619 |
| PHYHIP    | 2. 08946242  | 3. 246698766 | 0. 932226074 | 0. 287130449 | -1. 800221765 |
| LRRN4CL   | 2. 031411952 | 3. 149044484 | 0. 91377942  | 0. 290176727 | -1. 784996281 |
| NRGN      | 1. 174179017 | 0. 266033235 | 2. 082324798 | 7. 827310741 | 2. 96851672   |
| TNFRSF18  | 1. 204129362 | 0. 266033235 | 2. 142225489 | 8. 052473174 | 3. 009431949  |
| ADAM23    | 1. 173170243 | 0. 25        | 2. 096340486 | 8. 385361946 | 3. 067873058  |
| SNORD88B  | 1. 177408496 | 0. 24733421  | 2. 107482783 | 8. 520789672 | 3. 09098714   |
| HIST1H2BG | 3. 959599638 | 5. 578270581 | 2. 340928695 | 0. 419651335 | -1. 252736926 |
| NDC1      | 3. 911310862 | 2. 348278989 | 5. 474342735 | 2. 331214801 | 1. 221081942  |
| SLC22A3   | 2. 660557267 | 1. 353610569 | 3. 967503965 | 2. 931052739 | 1. 551418927  |
| GTSE1     | 2. 583170909 | 1. 27940068  | 3. 886941137 | 3. 038095256 | 1. 603167105  |
| CLDN23    | 3. 018539403 | 4. 424519224 | 1. 612559582 | 0. 364459843 | -1. 45616823  |
| ORAI3     | 2. 945437256 | 4. 276099446 | 1. 614775065 | 0. 377628043 | -1. 404962191 |
| NTN4      | 2. 9245907   | 4. 236621818 | 1. 612559582 | 0. 380623915 | -1. 393561885 |
| ECT2      | 5. 479688899 | 3. 625013879 | 7. 334363918 | 2. 023265058 | 1. 016685333  |
| CSTB      | 5826. 379686 | 8286. 592688 | 3366. 166685 | 0. 406218432 | -1. 299672393 |
| LINC01133 | 4. 17546858  | 5. 764762348 | 2. 586174812 | 0. 448617767 | -1. 156441337 |
| ARHGEF26  | 4. 092823817 | 5. 64307746  | 2. 542570174 | 0. 450564464 | -1. 150194561 |
| NGEF      | 4. 182026117 | 5. 759430768 | 2. 604621466 | 0. 452235919 | -1. 144852512 |
| USH1G     | 4. 135922999 | 5. 687886669 | 2. 583959329 | 0. 454291634 | -1. 138309357 |
| TPT1-AS1  | 4. 077746345 | 5. 571533362 | 2. 583959329 | 0. 463778849 | -1. 108491069 |
| SPRR2E    | 1708. 531123 | 1095. 897689 | 2321. 164558 | 2. 118048594 | 1. 082735689  |
| LINC00152 | 2. 343746233 | 1. 161787222 | 3. 525705244 | 3. 034725444 | 1. 601566     |
| KIF4A     | 2. 210808277 | 1. 013367445 | 3. 408249108 | 3. 363290507 | 1. 749873398  |
| SHCBP1    | 2. 218923862 | 1. 013367445 | 3. 424480279 | 3. 379307571 | 1. 756727665  |
| TUSC3     | 1. 548026522 | 0. 574209889 | 2. 521843155 | 4. 391849052 | 2. 13482847   |
| PIF1      | 1. 538525031 | 0. 516033235 | 2. 561016828 | 4. 962891251 | 2. 311180842  |
| CHI3L1    | 1. 944543198 | 0. 837577334 | 3. 051509062 | 3. 643256496 | 1. 865228569  |
| PXDN      | 1. 886743676 | 0. 763367445 | 3. 010119907 | 3. 94321231  | 1. 97937139   |
| CCNF      | 3. 571207803 | 2. 100944779 | 5. 041470828 | 2. 399620817 | 1. 262806452  |
| RPPH1     | 3. 389313402 | 4. 846969606 | 1. 931657197 | 0. 398528845 | -1. 327243948 |
| MYEOV     | 3. 283402406 | 4. 690552459 | 1. 876252354 | 0. 400006688 | -1. 321903974 |
| SORBS1    | 3. 184724408 | 4. 536801102 | 1. 832647715 | 0. 403951523 | -1. 307745925 |
| PDLIM3    | 3. 086928999 | 4. 380383955 | 1. 793474043 | 0. 409433068 | -1. 288300467 |
| CCDC127   | 3. 1733215   | 4. 486621818 | 1. 860021182 | 0. 414570529 | -1. 270310532 |
| SPTSSB    | 2. 460979304 | 3. 719328432 | 1. 202630176 | 0. 323346055 | -1. 628849086 |
| USP32P1   | 2. 295026086 | 3. 453969136 | 1. 136083036 | 0. 328921016 | -1. 604186906 |
| CD1A      | 2. 334393896 | 3. 470588583 | 1. 19819921  | 0. 345243805 | -1. 534312566 |
| LOC401286 | 2. 288038407 | 3. 361646434 | 1. 214430381 | 0. 361260592 | -1. 468888208 |
| UHRF1     | 5. 10631227  | 3. 377679669 | 6. 834944871 | 2. 023562191 | 1. 016897188  |

| pval     | padj     |
|----------|----------|
| 1.05E-25 | 7.32E-22 |
| 1.33E-23 | 6.19E-20 |
| 3.75E-23 | 1.31E-19 |
| 3.94E-22 | 1.10E-18 |
| 4.74E-19 | 1.10E-15 |
| 7.36E-19 | 1.47E-15 |
| 2.64E-18 | 4.61E-15 |
| 5.61E-17 | 8.69E-14 |
| 8.10E-17 | 1.03E-13 |
| 8.10E-17 | 1.03E-13 |
| 8.86E-17 | 1.03E-13 |
| 1.35E-16 | 1.45E-13 |
| 2.49E-16 | 2.48E-13 |
| 7.10E-16 | 6.60E-13 |
| 9.28E-16 | 8.09E-13 |
| 2.17E-15 | 1.78E-12 |
| 8.72E-15 | 6.76E-12 |
| 6.57E-14 | 4.83E-11 |
| 9.76E-14 | 6.80E-11 |
| 7.74E-13 | 5.14E-10 |
| 8.42E-13 | 5.34E-10 |
| 9.84E-13 | 5.97E-10 |
| 3.25E-12 | 1.89E-09 |
| 6.07E-12 | 3.38E-09 |
| 7.13E-12 | 3.82E-09 |
| 4.05E-11 | 2.02E-08 |
| 4.88E-11 | 2.35E-08 |
| 5.22E-11 | 2.43E-08 |
| 5.51E-11 | 2.48E-08 |
| 2.50E-10 | 1.09E-07 |
| 3.76E-10 | 1.59E-07 |
| 5.85E-10 | 2.40E-07 |
| 9.86E-10 | 3.82E-07 |
| 1.92E-09 | 7.24E-07 |
| 3.29E-09 | 1.18E-06 |
| 3.40E-09 | 1.19E-06 |
| 5.05E-09 | 1.72E-06 |
| 5.87E-09 | 1.95E-06 |
| 6.47E-09 | 2.10E-06 |
| 7.59E-09 | 2.40E-06 |
| 1.03E-08 | 3.19E-06 |
| 1.07E-08 | 3.23E-06 |
| 1.58E-08 | 4.67E-06 |
| 1.79E-08 | 5.20E-06 |
| 2.00E-08 | 5.70E-06 |
| 2.07E-08 | 5.76E-06 |

2.87E-08 7.86E-06  
3.55E-08 9.33E-06  
4.03E-08 1.04E-05  
5.47E-08 1.39E-05  
5.67E-08 1.41E-05  
5.79E-08 1.42E-05  
6.47E-08 1.55E-05  
6.92E-08 1.64E-05  
7.32E-08 1.70E-05  
1.21E-07 2.76E-05  
1.30E-07 2.94E-05  
1.38E-07 3.06E-05  
1.64E-07 3.58E-05  
1.70E-07 3.65E-05  
1.87E-07 3.95E-05  
2.36E-07 4.85E-05  
2.96E-07 5.98E-05  
3.01E-07 6.00E-05  
3.20E-07 6.28E-05  
3.45E-07 6.68E-05  
4.42E-07 8.32E-05  
5.46E-07 0.000102  
5.56E-07 0.000102  
6.02E-07 0.000109  
6.10E-07 0.000109  
6.37E-07 0.000113  
6.52E-07 0.000114  
6.96E-07 0.00012  
7.50E-07 0.000126  
7.46E-07 0.000126  
7.82E-07 0.00013  
8.42E-07 0.000138  
8.97E-07 0.000145  
1.03E-06 0.000166  
1.18E-06 0.000187  
1.21E-06 0.000189  
1.34E-06 0.000208  
1.36E-06 0.000208  
1.59E-06 0.000241  
1.65E-06 0.000248  
1.73E-06 0.000257  
2.00E-06 0.000294  
2.04E-06 0.000296  
2.17E-06 0.000312  
2.29E-06 0.000322  
2.29E-06 0.000322  
2.40E-06 0.000335



2.53E-06 0.000349  
2.69E-06 0.000368  
2.73E-06 0.000369  
3.22E-06 0.000431  
3.56E-06 0.000473  
3.71E-06 0.000483  
3.71E-06 0.000483  
4.16E-06 0.000532  
4.16E-06 0.000532  
4.40E-06 0.000558  
4.45E-06 0.000559  
4.66E-06 0.00058  
5.12E-06 0.000632  
5.22E-06 0.000639  
5.37E-06 0.000651  
5.88E-06 0.000707  
7.25E-06 0.00085  
7.20E-06 0.00085  
7.20E-06 0.00085  
7.39E-06 0.000852  
7.39E-06 0.000852  
8.19E-06 0.000936  
8.57E-06 0.000971  
9.75E-06 0.001097  
1.03E-05 0.001115  
1.03E-05 0.001115  
1.03E-05 0.001115  
1.03E-05 0.001115  
1.01E-05 0.001115  
1.13E-05 0.001207  
1.17E-05 0.001241  
1.28E-05 0.001355  
1.37E-05 0.001433  
1.46E-05 0.001523  
1.64E-05 0.001692  
1.67E-05 0.001717  
1.69E-05 0.001725  
1.78E-05 0.001801  
1.93E-05 0.001912  
1.93E-05 0.001912  
2.01E-05 0.001972  
2.17E-05 0.002113  
2.37E-05 0.002296  
2.41E-05 0.002322  
2.45E-05 0.002341  
2.53E-05 0.002402  
2.59E-05 0.002437

2. 62E-05 0. 002457  
2. 73E-05 0. 002541  
2. 87E-05 0. 002652  
2. 91E-05 0. 002668  
3. 11E-05 0. 002837  
3. 21E-05 0. 002904  
3. 28E-05 0. 002945  
3. 29E-05 0. 002945  
3. 44E-05 0. 003059  
3. 72E-05 0. 003259  
3. 70E-05 0. 003259  
3. 75E-05 0. 003271  
4. 03E-05 0. 003489  
4. 27E-05 0. 003642  
4. 28E-05 0. 003642  
4. 47E-05 0. 003777  
4. 55E-05 0. 003822  
4. 65E-05 0. 003887  
4. 75E-05 0. 003946  
5. 01E-05 0. 004134  
5. 06E-05 0. 004142  
5. 09E-05 0. 004142  
5. 11E-05 0. 004142  
5. 40E-05 0. 004302  
5. 38E-05 0. 004302  
5. 75E-05 0. 004503  
5. 75E-05 0. 004503  
5. 69E-05 0. 004503  
5. 93E-05 0. 004567  
5. 96E-05 0. 004567  
5. 91E-05 0. 004567  
5. 94E-05 0. 004567  
6. 15E-05 0. 004685  
6. 33E-05 0. 004796  
6. 59E-05 0. 004938  
6. 59E-05 0. 004938  
6. 76E-05 0. 00504  
7. 06E-05 0. 005239  
7. 16E-05 0. 005282  
7. 31E-05 0. 005338  
7. 31E-05 0. 005338  
7. 77E-05 0. 005643  
8. 02E-05 0. 005794  
8. 11E-05 0. 005831  
8. 76E-05 0. 006202  
8. 72E-05 0. 006202  
8. 74E-05 0. 006202

8.92E-05 0.006248  
9.11E-05 0.006355  
9.34E-05 0.006484  
9.76E-05 0.006673  
0.000106 0.007183  
0.00011 0.007451  
0.000111 0.007457  
0.000111 0.007457  
0.000122 0.008169  
0.000125 0.008321  
0.000132 0.00873  
0.000141 0.009248  
0.000148 0.009715  
0.000161 0.01046  
0.000187 0.011969  
0.000188 0.011969  
0.000186 0.011969  
0.000189 0.011969  
0.000188 0.011969  
0.000192 0.012057  
0.000196 0.012263  
0.000198 0.012322  
0.000201 0.012431  
0.000201 0.012431  
0.000207 0.012715  
0.000216 0.013216  
0.00022 0.013423  
0.000234 0.014208  
0.000238 0.014342  
0.000241 0.014498  
0.000243 0.014523  
0.000245 0.014523  
0.000246 0.014523  
0.000245 0.014523  
0.00025 0.014715  
0.000255 0.014937  
0.00026 0.015012  
0.00026 0.015012  
0.000258 0.015012  
0.000259 0.015012  
0.000263 0.015058  
0.000263 0.015058  
0.000265 0.015112  
0.000273 0.015455  
0.000277 0.015647  
0.000288 0.016193  
0.000302 0.016941

0.000305 0.017011  
0.000308 0.017095  
0.00031 0.017096  
0.00031 0.017096  
0.000331 0.018166  
0.000336 0.018389  
0.00034 0.018539  
0.00035 0.018996  
0.000373 0.020145  
0.000379 0.020418  
0.000384 0.020593  
0.000401 0.021444  
0.000419 0.022032  
0.000423 0.022171  
0.000424 0.022171  
0.00047 0.02447  
0.000483 0.024944  
0.000482 0.024944  
0.00049 0.025116  
0.00049 0.025116  
0.000526 0.026868  
0.000528 0.026889  
0.000538 0.027235  
0.000541 0.027235  
0.00054 0.027235  
0.000544 0.027275  
0.000574 0.028585  
0.000574 0.028585  
0.000582 0.028865  
0.000609 0.0301  
0.000611 0.0301  
0.000632 0.030752  
0.000631 0.030752  
0.000633 0.030752  
0.000641 0.030838  
0.00064 0.030838  
0.000639 0.030838  
0.000665 0.031895  
0.000669 0.031934  
0.000681 0.032409  
0.000692 0.032834  
0.000699 0.033057  
0.000709 0.033407  
0.000716 0.033635  
0.000726 0.033667  
0.000727 0.033667  
0.000724 0.033667

0.000724 0.033667  
0.000766 0.035379  
0.00077 0.035447  
0.000817 0.037482  
0.000823 0.037641  
0.00083 0.037804  
0.000832 0.037804  
0.000866 0.039231  
0.00089 0.040149  
0.000927 0.04142  
0.000949 0.042269  
0.000958 0.042484  
0.00096 0.042484  
0.000993 0.043828  
0.001004 0.044041  
0.001004 0.044041  
0.001008 0.044067  
0.001068 0.046554  
0.001083 0.047066  
0.001117 0.048235  
0.001117 0.048235  
0.001129 0.048614  
0.001136 0.04877  
0.001146 0.049021  
0.001161 0.049229  
0.001179 0.049842  
0.001229 0.051788  
0.001237 0.05198  
0.001362 0.056878  
0.001364 0.056878  
0.001366 0.056878  
0.001384 0.05701  
0.001378 0.05701  
0.001378 0.05701  
0.001386 0.05701  
0.0014 0.057263  
0.0014 0.057263  
0.00143 0.058185  
0.001431 0.058185  
0.00145 0.058781  
0.001467 0.059158  
0.001468 0.059158  
0.001485 0.059679  
0.001489 0.059689  
0.001497 0.059806  
0.001559 0.061757  
0.001554 0.061757

0.001558 0.061757  
0.00157 0.062021  
0.001595 0.062679  
0.001595 0.062679  
0.001603 0.062807  
0.001615 0.063075  
0.00162 0.063124  
0.001637 0.063593  
0.001647 0.063817  
0.001677 0.064647  
0.001678 0.064647  
0.00172 0.066081  
0.001728 0.066209  
0.001738 0.066395  
0.001754 0.066823  
0.001803 0.068251  
0.001797 0.068251  
0.001811 0.068251  
0.001808 0.068251  
0.001829 0.06876  
0.001893 0.070735  
0.001893 0.070735  
0.001897 0.070735  
0.00193 0.071649  
0.001932 0.071649  
0.001973 0.073006  
0.001995 0.073601  
0.00205 0.075447  
0.002072 0.075865  
0.002068 0.075865  
0.00208 0.075929  
0.002185 0.078943  
0.002216 0.07986  
0.002255 0.081069  
0.002262 0.081098  
0.002313 0.081919  
0.002313 0.081919  
0.002313 0.081919  
0.002314 0.081919  
0.002324 0.082048  
0.002331 0.082088  
0.002379 0.083593  
0.002387 0.08363  
0.002475 0.086078  
0.002475 0.086078  
0.002475 0.086078  
0.002547 0.088377

0.002594 0.089779  
0.002643 0.091033  
0.002738 0.094064  
0.002795 0.095315  
0.002868 0.097549  
0.002906 0.098361  
0.002905 0.098361  
0.003 0.100856  
0.003001 0.100856  
0.003071 0.102962  
0.003149 0.104894  
0.003151 0.104894  
0.003204 0.106131  
0.003214 0.106212  
0.003229 0.106477  
0.00328 0.107893  
0.003369 0.110028  
0.003426 0.111625  
0.00349 0.113197  
0.003565 0.114577  
0.003604 0.115551  
0.003635 0.11602  
0.003633 0.11602  
0.003661 0.116566  
0.003696 0.117406  
0.003899 0.12247  
0.004041 0.125517  
0.004067 0.125776  
0.004067 0.125776  
0.004079 0.125859  
0.004128 0.127083  
0.004201 0.127106  
0.004195 0.127106  
0.004178 0.127106  
0.004311 0.129852  
0.004384 0.130914  
0.004384 0.130914  
0.004384 0.130914  
0.004377 0.130914  
0.004421 0.131184  
0.004421 0.131184  
0.004802 0.141001  
0.004867 0.141786  
0.004874 0.141786  
0.004917 0.141968  
0.004945 0.142501  
0.004966 0.142812

0.005091 0.145811  
0.005165 0.146925  
0.005165 0.146925  
0.005172 0.146925  
0.005195 0.147259  
0.005504 0.153137  
0.005504 0.153137  
0.005489 0.153137  
0.00565 0.156391  
0.005717 0.15697  
0.005717 0.15697  
0.005717 0.15697  
0.005753 0.157454  
0.005782 0.157627  
0.00584 0.158463  
0.005858 0.158463  
0.005856 0.158463  
0.006183 0.165198  
0.006175 0.165198  
0.006213 0.165688  
0.006332 0.168175  
0.006332 0.168175  
0.006422 0.169625  
0.006655 0.174782  
0.006667 0.174782  
0.006698 0.175255  
0.006971 0.181056  
0.007184 0.184882  
0.00716 0.184882  
0.00742 0.188109  
0.007684 0.189691  
0.0076 0.189691  
0.007679 0.189691  
0.007607 0.189691  
0.007726 0.189717  
0.007724 0.189717  
0.007775 0.190568  
0.007821 0.191361  
0.007871 0.191586  
0.007871 0.191586  
0.007871 0.191586  
0.00813 0.196179  
0.008177 0.196288  
0.008177 0.196288  
0.008166 0.196288  
0.008415 0.199587  
0.008415 0.199587



0.008415 0.199587  
0.009312 0.215033  
0.009312 0.215033  
0.009361 0.21579  
0.009407 0.216135  
0.00949 0.217332  
0.010043 0.226289  
0.010125 0.227757  
0.010314 0.230148  
0.010314 0.230148  
0.010314 0.230148  
0.010568 0.234711  
0.010877 0.23853  
0.010922 0.238769  
0.010972 0.239475  
0.011318 0.244734  
0.011318 0.244734  
0.011318 0.244734  
0.011528 0.24888  
0.01159 0.249846  
0.01223 0.261203  
0.01246 0.265708  
0.012548 0.266771  
0.012548 0.266771  
0.012848 0.271911  
0.012848 0.271911  
0.012876 0.27209  
0.013155 0.276718  
0.013155 0.276718  
0.013318 0.277651  
0.013318 0.277651  
0.013318 0.277651  
0.01349 0.278734  
0.01349 0.278734  
0.013586 0.279063  
0.013586 0.279063  
0.013586 0.279063  
0.013738 0.279975  
0.014214 0.284165  
0.014606 0.291004  
0.014659 0.291244  
0.014659 0.291244  
0.0147 0.291645  
0.014893 0.293799  
0.014893 0.293799  
0.015711 0.304331  
0.0158 0.304798

0.0158 0.304798  
0.016047 0.307858  
0.016192 0.308062  
0.016192 0.308062  
0.016192 0.308062  
0.016339 0.309628  
0.016597 0.311243  
0.016597 0.311243  
0.016603 0.311243  
0.016603 0.311243  
0.016603 0.311243  
0.016555 0.311243  
0.01752 0.323638  
0.017819 0.327011  
0.017819 0.327011  
0.018066 0.331095  
0.018192 0.332967  
0.019489 0.346756  
0.019489 0.346756  
0.019966 0.350274  
0.019966 0.350274  
0.020873 0.360678  
0.021458 0.367665  
0.021799 0.373036  
0.02198 0.375217  
0.022215 0.376928  
0.022215 0.376928  
0.022215 0.376928  
0.022215 0.376928  
0.022677 0.381133  
0.022677 0.381133  
0.022618 0.381133  
0.022618 0.381133  
0.022618 0.381133  
0.022618 0.381133  
0.022791 0.38114  
0.02294 0.382706  
0.02294 0.382706  
0.02311 0.384174  
0.024075 0.394571  
0.024075 0.394571  
0.024075 0.394571  
0.024075 0.394571  
0.024518 0.400884  
0.024726 0.403338  
0.02608 0.417603  
0.02608 0.417603  
0.026393 0.418177

0.026393 0.418177  
0.026308 0.418177  
0.026251 0.418177  
0.026591 0.420482  
0.027715 0.431214  
0.027715 0.431214  
0.028487 0.436596  
0.028487 0.436596  
0.028487 0.436596  
0.028487 0.436596  
0.028421 0.436596  
0.028634 0.436685  
0.028649 0.436685  
0.028649 0.436685  
0.028634 0.436685  
0.029093 0.440339  
0.029093 0.440339  
0.029161 0.440339  
0.029161 0.440339  
0.029161 0.440339  
0.029351 0.441113  
0.029351 0.441113  
0.030605 0.457498  
0.030755 0.458829  
0.032165 0.473219  
0.032165 0.473219  
0.032272 0.473794  
0.032272 0.473794  
0.032658 0.477393  
0.032863 0.479442  
0.03307 0.481948  
0.035014 0.495368  
0.035014 0.495368  
0.035014 0.495368  
0.035014 0.495368  
0.035078 0.495368  
0.035078 0.495368  
0.035078 0.495368  
0.035328 0.496192  
0.035328 0.496192  
0.036521 0.502376  
0.036521 0.502376  
0.036521 0.502376  
0.036521 0.502376  
0.036521 0.502376  
0.036521 0.502376

0. 036521 0. 502376  
0. 038452 0. 518483  
0. 038452 0. 518483  
0. 038625 0. 518483  
0. 038625 0. 518483  
0. 038625 0. 518483  
0. 038625 0. 518483  
0. 039137 0. 524847  
0. 041013 0. 539123  
0. 041146 0. 539347  
0. 041146 0. 539347  
0. 041385 0. 539436  
0. 041385 0. 539436  
0. 041385 0. 539436  
0. 042604 0. 540178  
0. 043083 0. 5409  
0. 043101 0. 5409  
0. 043101 0. 5409  
0. 043101 0. 5409  
0. 043101 0. 5409  
0. 043101 0. 5409  
0. 043243 0. 5409  
0. 043446 0. 541497  
0. 043446 0. 541497  
0. 043446 0. 541497  
0. 043669 0. 543316  
0. 043669 0. 543316  
0. 044635 0. 55286  
0. 044635 0. 55286  
0. 04552 0. 560699  
0. 047197 0. 573397  
0. 047197 0. 573397  
0. 047197 0. 573397  
0. 047197 0. 573397  
0. 047197 0. 573397  
0. 047421 0. 574117  
0. 047421 0. 574117  
0. 047421 0. 574117  
0. 047421 0. 574117  
0. 048035 0. 574484
