# Supplementary material for: [Retracted] Identification of the Potential Biomarkers Involved in the Human Oral Mucosal Wound Healing: A Bioinformatic Study
Source: Hindawi journal article supplement (doi:10.1155/2021/6695245), 2021-01-01
Supplement: f3 [file 6695245.f3.pdf]

| ID       | pathway          | GeneRatio | BgRatio  | pvalue   | p.adjust    | qvalue      | geneID    |
|----------|------------------|-----------|----------|----------|-------------|-------------|-----------|
| hsa04115 | p53 signal       | 12/203    | 69/5894  | 3.15E-06 | 0.000513957 | 0.000477945 | 10912/461 |
| hsa04110 | Cell cycle       | 113/203   | 128/5894 | 0.000421 | 0.033560092 | 0.03120861  | 10912/461 |
| hsa04512 | ECM-receptor     | 10/203    | 85/5894  | 0.000618 | 0.033560092 | 0.03120861  | 1311/3913 |
| hsa00590 | Arachidonic acid | 8/203     | 59/5894  | 0.000844 | 0.034392546 | 0.031982736 | 4056/239/ |

Count

12

13

10

8
