# Supplementary material for: [Retracted] Identification of the Potential Biomarkers Involved in the Human Oral Mucosal Wound Healing: A Bioinformatic Study
Source: Hindawi journal article supplement (doi:10.1155/2021/6695245), 2021-01-01
Supplement: f5 [file 6695245.f5.pdf]

| name           | label | Degree | AverageShortestPathLength | BetweennessCentrality | ClosenessCentrality | TopologicalCoefficient |
|----------------|-------|--------|---------------------------|-----------------------|---------------------|------------------------|
| CCND1          | down  | 388    | 2.59318637                | 0.08167631            | 0.38562597          | 0.03536598             |
| SOD2           | up    | 363    | 2.63193053                | 0.07197935            | 0.37994924          | 0.03241761             |
| TXNIP          | down  | 322    | 2.64662659                | 0.05395915            | 0.37783948          | 0.03341208             |
| LMNB2          | up    | 297    | 2.70674683                | 0.04903789            | 0.36944719          | 0.02984888             |
| YOD1           | down  | 282    | 2.6740147                 | 0.04675441            | 0.37396952          | 0.04022989             |
| RORA           | down  | 231    | 2.7254509                 | 0.02803392            | 0.36691176          | 0.04383463             |
| TSC22D2        | down  | 225    | 2.75217101                | 0.03042887            | 0.36334951          | 0.04614987             |
| THBS1          | up    | 209    | 2.73881096                | 0.0233495             | 0.36512195          | 0.04704602             |
| ZNF431         | down  | 203    | 2.79024716                | 0.02843133            | 0.35839119          | 0.04019704             |
| IGFBP5         | down  | 193    | 2.7755511                 | 0.02303943            | 0.36028881          | 0.04237217             |
| SECISBP2L      | down  | 186    | 2.75551102                | 0.02227491            | 0.36290909          | 0.04888935             |
| SESN2          | down  | 186    | 2.73881096                | 0.02360635            | 0.36512195          | 0.04734047             |
| MKI67          | up    | 178    | 2.78223113                | 0.01685201            | 0.35942377          | 0.05197271             |
| SLC16A1        | up    | 176    | 2.83433534                | 0.02094186            | 0.3528164           | 0.03725257             |
| NAV1           | up    | 168    | 2.78490314                | 0.0197461             | 0.35907892          | 0.04510491             |
| MSN            | up    | 162    | 2.80427522                | 0.02032737            | 0.35659838          | 0.0429472              |
| CCNB1          | up    | 159    | 2.7989312                 | 0.01349991            | 0.35727924          | 0.05519965             |
| GPRC5A         | down  | 155    | 2.81830327                | 0.01853155            | 0.35482342          | 0.052165               |
| SIK1           | down  | 153    | 2.80694723                | 0.01272185            | 0.35625892          | 0.06120448             |
| AMOTL2         | down  | 149    | 2.81563126                | 0.01565675            | 0.35516014          | 0.04248418             |
| WDR26          | down  | 148    | 2.81429526                | 0.01460979            | 0.35532874          | 0.05395889             |
| DDX21          | up    | 147    | 2.76553106                | 0.01225252            | 0.3615942           | 0.05761403             |
| RMND5A         | down  | 146    | 2.77755511                | 0.01208211            | 0.36002886          | 0.05444551             |
| hsa-miR-34a-5p |       | 144    | 2.35905144                | 0.03063117            | 0.42389919          | 0.02850087             |
| ZNF426         | down  | 142    | 2.83166333                | 0.01639736            | 0.35314933          | 0.04151408             |
| RRM2           | up    | 139    | 2.81229125                | 0.01328827            | 0.35558195          | 0.05853116             |
| FSCN1          | up    | 136    | 2.84368737                | 0.01565483            | 0.3516561           | 0.04200622             |
| HBP1           | down  | 135    | 2.79559118                | 0.0122495             | 0.35770609          | 0.06161031             |
| KPNA2          | up    | 135    | 2.81763527                | 0.01085228            | 0.35490754          | 0.06208441             |
| hsa-miR-335-5p |       | 130    | 2.58016032                | 0.03271241            | 0.38757282          | 0.02284436             |
| ADAMTS1        | up    | 130    | 2.8002672                 | 0.01053941            | 0.35710878          | 0.06246359             |
| CCNF           | up    | 130    | 2.85170341                | 0.01631587            | 0.3506676           | 0.05696681             |
| ID4            | down  | 121    | 2.81629927                | 0.01145055            | 0.3550759           | 0.04455784             |
| PER1           | down  | 121    | 2.84502338                | 0.0174918             | 0.35149096          | 0.0372494              |
| ATP1A1         | up    | 119    | 2.81496326                | 0.00831061            | 0.35524442          | 0.05402432             |
| BIRC5          | up    | 117    | 2.80694723                | 0.0119849             | 0.35625892          | 0.04905723             |
| LDHA           | up    | 117    | 2.82364729                | 0.00946944            | 0.35415188          | 0.04522953             |
| TSC22D3        | down  | 116    | 2.81629927                | 0.00739806            | 0.3550759           | 0.05895315             |
| ITGA3          | up    | 115    | 2.86973948                | 0.0096932             | 0.34846369          | 0.05096428             |
| MARCKSL1       | up    | 114    | 2.82164329                | 0.01054624            | 0.35440341          | 0.05841308             |
| ADM            | down  | 111    | 2.90647963                | 0.00850533            | 0.34405884          | 0.03832827             |
| IGF2           | down  | 109    | 2.8757515                 | 0.00994266            | 0.34773519          | 0.05798165             |
| SGK1           | up    | 109    | 2.89111556                | 0.00695298            | 0.34588725          | 0.05525146             |
| hsa-miR-16-5p  |       | 108    | 2.3991316                 | 0.01537996            | 0.41681749          | 0.03839396             |
| FAM118A        | down  | 106    | 2.85838343                | 0.01004736            | 0.3498481           | 0.05546886             |
| ANLN           | up    | 105    | 2.85237141                | 0.00417888            | 0.35058548          | 0.07828854             |

|                 |      |     |            |            |            |            |
|-----------------|------|-----|------------|------------|------------|------------|
| CTGF            | down | 105 | 2.85437542 | 0.00696922 | 0.35033934 | 0.06185808 |
| DUSP4           | down | 105 | 2.86305945 | 0.00779661 | 0.34927671 | 0.05642317 |
| HIST1H2BC       | down | 105 | 2.87909152 | 0.00820441 | 0.34733179 | 0.0718638  |
| TNC             | up   | 104 | 2.82698731 | 0.00816169 | 0.35373346 | 0.04701815 |
| PHACTR4         | down | 103 | 2.85905144 | 0.00792856 | 0.34976636 | 0.05966372 |
| AGTRAP          | up   | 102 | 2.85905144 | 0.00974622 | 0.34976636 | 0.03565705 |
| TM4SF1          | down | 102 | 2.89645959 | 0.01017208 | 0.34524908 | 0.05812132 |
| DDAH1           | down | 101 | 2.85504342 | 0.00844298 | 0.35025737 | 0.06235673 |
| H1FO            | down | 100 | 2.9004676  | 0.00693543 | 0.34477199 | 0.05090164 |
| RFK             | down | 100 | 2.89178357 | 0.00519807 | 0.34580735 | 0.07306011 |
| TIMP2           | down | 100 | 2.83366733 | 0.00618783 | 0.35289958 | 0.06997727 |
| CCNA2           | up   | 99  | 2.86439546 | 0.00527315 | 0.34911381 | 0.08428263 |
| PXDN            | up   | 99  | 2.85437542 | 0.00632017 | 0.35033934 | 0.07511071 |
| AURKA           | up   | 98  | 2.87307949 | 0.01073673 | 0.34805859 | 0.05379157 |
| SLC16A9         | up   | 97  | 2.89645959 | 0.00811576 | 0.34524908 | 0.06965729 |
| RPS6KA4         | up   | 96  | 2.90313961 | 0.00739329 | 0.34445467 | 0.05051648 |
| EMP1            | down | 95  | 2.84168337 | 0.00709851 | 0.35190409 | 0.05200815 |
| hsa-miR-26b-5p  |      | 92  | 2.56412826 | 0.01515593 | 0.38999609 | 0.03382389 |
| COL4A1          | up   | 92  | 2.8757515  | 0.00666041 | 0.34773519 | 0.07581038 |
| PRDM1           | down | 92  | 2.8991316  | 0.00502617 | 0.34493088 | 0.07685283 |
| LONRF1          | down | 91  | 2.84635939 | 0.00646572 | 0.35132598 | 0.05870111 |
| SNX9            | down | 90  | 2.84168337 | 0.00769595 | 0.35190409 | 0.05356061 |
| LRRC59          | up   | 89  | 2.89445558 | 0.00621581 | 0.34548811 | 0.07096236 |
| hsa-miR-17-5p   |      | 88  | 2.43720775 | 0.01118814 | 0.41030561 | 0.04509799 |
| EREG            | down | 88  | 2.87241149 | 0.00908752 | 0.34813953 | 0.05110851 |
| CLDN4           | down | 87  | 2.9011356  | 0.00833922 | 0.34469261 | 0.04188741 |
| FOS             | up   | 87  | 2.85170341 | 0.00764175 | 0.3506676  | 0.05086875 |
| MELK            | up   | 87  | 2.8991316  | 0.0059996  | 0.34493088 | 0.05300475 |
| hsa-miR-522-5p  |      | 86  | 2.47795591 | 0.01433415 | 0.40355843 | 0.04025465 |
| CCDC127         | down | 85  | 2.93854375 | 0.00809494 | 0.34030461 | 0.05878777 |
| hsa-let-7a-5p   |      | 84  | 2.45190381 | 0.00966048 | 0.40784634 | 0.04554469 |
| ADAMTS4         | up   | 84  | 2.96125585 | 0.00529372 | 0.33769456 | 0.04387049 |
| C18orf25        | down | 84  | 2.91048764 | 0.00569949 | 0.34358504 | 0.05500594 |
| SASH1           | down | 84  | 2.87174349 | 0.0057175  | 0.34822052 | 0.06311275 |
| WNT5A           | down | 84  | 2.88643955 | 0.00456435 | 0.34644758 | 0.06108459 |
| hsa-miR-27a-3p  |      | 83  | 2.46125585 | 0.01044777 | 0.40629665 | 0.04742426 |
| BUB1            | up   | 83  | 2.93319973 | 0.00444283 | 0.34092462 | 0.05050691 |
| SERPINE1        | up   | 83  | 2.83299933 | 0.00400729 | 0.35298279 | 0.06759195 |
| hsa-miR-103a-3p |      | 82  | 2.51803607 | 0.00843103 | 0.3971349  | 0.04307632 |
| CDC25B          | up   | 82  | 2.89779559 | 0.00708292 | 0.3450899  | 0.05449591 |
| KIF2C           | up   | 82  | 2.89712759 | 0.00647621 | 0.34516947 | 0.06045804 |
| CEP55           | up   | 81  | 2.86706747 | 0.00478969 | 0.34878844 | 0.06775356 |
| DUSP1           | down | 81  | 2.89245157 | 0.0048433  | 0.34572748 | 0.07352752 |
| hsa-let-7b-5p   |      | 79  | 2.43787575 | 0.00976041 | 0.41019318 | 0.04893493 |
| hsa-miR-93-5p   |      | 79  | 2.46860387 | 0.0093025  | 0.40508727 | 0.04892729 |
| DUSP5           | down | 79  | 2.86573146 | 0.00346961 | 0.34895105 | 0.07816532 |
| SLC43A3         | up   | 78  | 2.95390782 | 0.00341941 | 0.3385346  | 0.05884826 |

|                 |    |            |            |            |            |
|-----------------|----|------------|------------|------------|------------|
| hsa-miR-124-3p  | 77 | 2.6509686  | 0.00956051 | 0.37722061 | 0.03456448 |
| OSMR up         | 77 | 2.90247161 | 0.00753056 | 0.34453395 | 0.05101547 |
| hsa-miR-24-3p   | 76 | 2.46259185 | 0.01011739 | 0.40607622 | 0.0460155  |
| hsa-miR-107     | 76 | 2.54208417 | 0.00738204 | 0.39337801 | 0.0445615  |
| ANKRD33B down   | 76 | 3.01536406 | 0.00627176 | 0.33163491 | 0.05564363 |
| PLK1 up         | 75 | 2.88643955 | 0.00636083 | 0.34644758 | 0.06608696 |
| hsa-miR-15a-5p  | 74 | 2.59686039 | 0.00690685 | 0.38508039 | 0.04419868 |
| hsa-miR-20a-5p  | 74 | 2.46993988 | 0.00830784 | 0.40486815 | 0.05002298 |
| hsa-miR-424-5p  | 71 | 2.48730795 | 0.00858618 | 0.40204109 | 0.04849861 |
| KIAA1147 down   | 71 | 2.92718771 | 0.00200491 | 0.34162483 | 0.08736419 |
| NPM3 up         | 71 | 3.0507682  | 0.00182639 | 0.32778629 | 0.05887206 |
| PRR11 up        | 71 | 2.91048764 | 0.00595948 | 0.34358504 | 0.05147598 |
| RIOK3 down      | 71 | 2.93587174 | 0.00290241 | 0.34061433 | 0.0862625  |
| hsa-let-7e-5p   | 70 | 2.52271209 | 0.00667348 | 0.39639878 | 0.0508311  |
| MYBL2 up        | 70 | 2.91716767 | 0.00420363 | 0.34279826 | 0.06554854 |
| SRM up          | 70 | 2.90380762 | 0.00433267 | 0.34437543 | 0.06847951 |
| hsa-miR-92a-3p  | 69 | 2.58951236 | 0.00693883 | 0.38617309 | 0.04795083 |
| hsa-miR-181a-5p | 69 | 2.58416834 | 0.00831901 | 0.38697169 | 0.04750811 |
| CYBRD1 down     | 69 | 2.91449566 | 0.00437892 | 0.34311254 | 0.0631414  |
| GPSM1 down      | 69 | 2.8997996  | 0.00251826 | 0.34485142 | 0.06404128 |
| MXD1 down       | 69 | 2.90915164 | 0.00615962 | 0.34374282 | 0.06790338 |
| SYNGR1 down     | 69 | 2.97995992 | 0.00703028 | 0.33557498 | 0.04466538 |
| hsa-miR-30a-5p  | 68 | 2.51536406 | 0.00760653 | 0.39755677 | 0.04921025 |
| hsa-let-7f-5p   | 68 | 2.54342017 | 0.00669191 | 0.39317137 | 0.05058151 |
| PIM1 down       | 68 | 2.85303941 | 0.00478418 | 0.35050339 | 0.06318206 |
| TIPARP down     | 68 | 2.90447562 | 0.00384906 | 0.34429623 | 0.06882197 |
| PELI1 down      | 67 | 2.93253173 | 0.00212684 | 0.34100228 | 0.0848052  |
| hsa-miR-106b-5p | 66 | 2.51469606 | 0.00668373 | 0.39766237 | 0.05199981 |
| hsa-miR-27b-3p  | 66 | 2.52137609 | 0.0071925  | 0.39660882 | 0.05220025 |
| GABARAPL1 down  | 66 | 2.91315965 | 0.00552176 | 0.34326989 | 0.06100166 |
| hsa-miR-98-5p   | 65 | 2.55477622 | 0.0057012  | 0.39142372 | 0.0511188  |
| hsa-miR-23b-3p  | 65 | 2.59619238 | 0.00744112 | 0.38517947 | 0.04732517 |
| DDX3Y up        | 65 | 2.91716767 | 0.00187777 | 0.34279826 | 0.08080016 |
| POLR3G up       | 65 | 2.92651971 | 0.00521082 | 0.34170281 | 0.06642383 |
| RGS5 down       | 65 | 2.95457582 | 0.0038415  | 0.33845806 | 0.05580598 |
| UBL3 down       | 65 | 2.89512358 | 0.00475396 | 0.3454084  | 0.0665345  |
| hsa-miR-15b-5p  | 64 | 2.65430862 | 0.00465768 | 0.37674594 | 0.04774202 |
| hsa-let-7d-5p   | 64 | 2.5501002  | 0.00596765 | 0.39214145 | 0.05069805 |
| SAMD5 down      | 64 | 2.95724783 | 0.00365105 | 0.33815225 | 0.06195781 |
| FCH02 down      | 63 | 2.96526386 | 0.00369476 | 0.33723812 | 0.09291401 |
| hsa-let-7g-5p   | 62 | 2.55945224 | 0.00477222 | 0.3907086  | 0.05417155 |
| CHP1 down       | 62 | 2.93052772 | 0.0020877  | 0.34123547 | 0.06104704 |
| IER3 down       | 62 | 2.9258517  | 0.00540669 | 0.34178082 | 0.07517691 |
| IGFBP3 down     | 62 | 2.87641951 | 0.00257872 | 0.34765444 | 0.08652074 |
| LPCAT1 up       | 62 | 2.88710755 | 0.00404507 | 0.34636742 | 0.07472987 |
| hsa-let-7i-5p   | 61 | 2.56346025 | 0.00479583 | 0.39009772 | 0.05438244 |
| CTSC up         | 61 | 2.90313961 | 0.00171708 | 0.34445467 | 0.0947364  |

|                 |      |    |            |            |            |            |
|-----------------|------|----|------------|------------|------------|------------|
| IFRD1           | down | 61 | 2.93587174 | 0.00329819 | 0.34061433 | 0.0630517  |
| LRRC20          | down | 61 | 3.00935204 | 0.00484172 | 0.33229745 | 0.07614244 |
| hsa-miR-7-5p    |      | 60 | 2.58082832 | 0.00689606 | 0.3874725  | 0.04963667 |
| CHRDL1          | down | 60 | 3.05544422 | 0.00236983 | 0.32728465 | 0.04899425 |
| LTBP1           | up   | 60 | 2.88844355 | 0.00240125 | 0.34620722 | 0.08248382 |
| SOCS3           | up   | 60 | 2.93119572 | 0.00366485 | 0.3411577  | 0.08529963 |
| hsa-miR-22-3p   |      | 59 | 2.59819639 | 0.00630567 | 0.38488238 | 0.05249916 |
| hsa-miR-195-5p  |      | 59 | 2.68570474 | 0.00458634 | 0.37234175 | 0.0490011  |
| hsa-let-7c-5p   |      | 59 | 2.55744823 | 0.00501596 | 0.39101476 | 0.05475952 |
| COL4A2          | up   | 59 | 2.90848363 | 0.00252832 | 0.34382177 | 0.10046544 |
| FMNL2           | up   | 59 | 2.94188377 | 0.00339125 | 0.33991826 | 0.06681971 |
| MXI1            | down | 59 | 2.88243153 | 0.0027528  | 0.34692932 | 0.06653053 |
| PKMYT1          | up   | 59 | 2.9245157  | 0.00427993 | 0.34193696 | 0.0667315  |
| hsa-miR-182-5p  |      | 57 | 2.6509686  | 0.00537861 | 0.37722061 | 0.05151884 |
| CPA4            | down | 57 | 2.94388778 | 0.00402849 | 0.33968686 | 0.07255602 |
| ECT2            | up   | 57 | 2.93386774 | 0.00186142 | 0.34084699 | 0.07892238 |
| SHCBP1          | up   | 57 | 2.9011356  | 0.00205856 | 0.34469261 | 0.07410317 |
| UBE2S           | up   | 57 | 2.95991984 | 0.00233913 | 0.33784699 | 0.05506073 |
| hsa-miR-30c-5p  |      | 55 | 2.62959252 | 0.00403051 | 0.38028706 | 0.05706131 |
| hsa-miR-106a-5p |      | 55 | 2.57949232 | 0.00475656 | 0.38767318 | 0.06067018 |
| MYO1B           | up   | 55 | 2.96125585 | 0.00255884 | 0.33769456 | 0.07754655 |
| ODC1            | up   | 55 | 2.94054776 | 0.0013928  | 0.34007269 | 0.08507424 |
| hsa-miR-30d-5p  |      | 54 | 2.65230461 | 0.00387092 | 0.3770306  | 0.05646666 |
| hsa-miR-30e-5p  |      | 54 | 2.64495658 | 0.00373982 | 0.37807804 | 0.05770405 |
| hsa-miR-23a-3p  |      | 54 | 2.59352037 | 0.00470515 | 0.3855763  | 0.05633803 |
| hsa-miR-20b-5p  |      | 54 | 2.65698063 | 0.00369503 | 0.37636706 | 0.05804378 |
| hsa-miR-193b-3p |      | 53 | 2.76653307 | 0.00518876 | 0.36146324 | 0.04998694 |
| hsa-miR-17-3p   |      | 53 | 2.72311289 | 0.00459786 | 0.36722679 | 0.05402925 |
| hsa-miR-128-3p  |      | 53 | 2.59686039 | 0.00669673 | 0.38508039 | 0.05521956 |
| hsa-miR-497-5p  |      | 53 | 2.68303273 | 0.00440683 | 0.37271256 | 0.05547767 |
| CA2             | up   | 53 | 2.93921176 | 0.0016372  | 0.34022727 | 0.0833699  |
| HEBP2           | down | 53 | 2.96593186 | 0.00342683 | 0.33716216 | 0.05062992 |
| KRT8            | down | 52 | 2.99064796 | 0.00389208 | 0.3343757  | 0.05922058 |
| hsa-miR-192-5p  |      | 51 | 2.81663327 | 0.00349542 | 0.3550338  | 0.0473246  |
| hsa-miR-21-5p   |      | 51 | 2.65764863 | 0.00502014 | 0.37627246 | 0.05806624 |
| ARPC1B          | up   | 51 | 2.97862391 | 0.00190438 | 0.3357255  | 0.0645685  |
| hsa-miR-29a-3p  |      | 51 | 2.6255845  | 0.00440913 | 0.38086757 | 0.05792814 |
| NCOA7           | up   | 51 | 2.96192385 | 0.00320419 | 0.3376184  | 0.0751431  |
| SLC6A9          | down | 51 | 2.91249165 | 0.00231942 | 0.34334862 | 0.08363345 |
| TIMP3           | down | 51 | 2.88977956 | 0.00313372 | 0.34604716 | 0.09119054 |
| TRIP10          | down | 51 | 3.03072812 | 0.00248952 | 0.32995371 | 0.07949536 |
| hsa-miR-122-5p  |      | 50 | 2.82865731 | 0.00483582 | 0.35352462 | 0.04552834 |
| ERO1A           | down | 50 | 3.01402806 | 0.00331421 | 0.33178191 | 0.08759398 |
| NDC1            | up   | 50 | 2.90447562 | 9.61E-04   | 0.34429623 | 0.11103275 |
| hsa-miR-148b-3p |      | 49 | 2.73179693 | 0.00447386 | 0.36605942 | 0.05760473 |
| FTH1            | down | 49 | 2.96860387 | 0.00265524 | 0.33685869 | 0.06203335 |
| GSN             | down | 49 | 2.90848363 | 0.00344681 | 0.34382177 | 0.0652251  |

|                 |      |    |            |            |            |            |
|-----------------|------|----|------------|------------|------------|------------|
| MTHFD1L         | up   | 49 | 2.97929192 | 0.00362229 | 0.33565022 | 0.05770126 |
| SCIN            | down | 49 | 3.05143621 | 0.0022246  | 0.32771454 | 0.0505458  |
| ARHGEF26        | down | 48 | 2.93921176 | 0.00240191 | 0.34022727 | 0.07134544 |
| hsa-miR-148a-3p |      | 48 | 2.67902472 | 0.00358696 | 0.37327017 | 0.06331922 |
| NRGN            | up   | 48 | 3.01068804 | 0.00353021 | 0.33214999 | 0.05265152 |
| hsa-miR-30b-5p  |      | 47 | 2.68169673 | 0.00302419 | 0.37289824 | 0.0612766  |
| hsa-miR-155-5p  |      | 47 | 2.75517702 | 0.00390711 | 0.36295309 | 0.05323294 |
| hsa-miR-101-3p  |      | 47 | 2.54342017 | 0.00549737 | 0.39317137 | 0.06432219 |
| hsa-miR-186-5p  |      | 47 | 2.61155645 | 0.00544842 | 0.38291342 | 0.06175904 |
| LTB4R2          | up   | 47 | 3.00334001 | 0.00240888 | 0.33296263 | 0.06867205 |
| TTC9            | down | 47 | 3.01068804 | 7.43E-04   | 0.33214999 | 0.09647438 |
| hsa-miR-218-5p  |      | 46 | 2.8500334  | 0.00293733 | 0.35087308 | 0.05295907 |
| hsa-miR-130a-3p |      | 46 | 2.68036072 | 0.00349846 | 0.37308411 | 0.0613509  |
| F3              | down | 46 | 2.9512358  | 0.00186228 | 0.3388411  | 0.08168463 |
| HDAC5           | down | 46 | 3.00133601 | 0.00265101 | 0.33318495 | 0.0577745  |
| LFNG            | down | 46 | 2.94121576 | 0.00208128 | 0.33999546 | 0.07578834 |
| hsa-miR-181b-5p |      | 45 | 2.83466934 | 0.00285123 | 0.35277483 | 0.06202858 |
| hsa-miR-26a-5p  |      | 45 | 2.77254509 | 0.00286625 | 0.36067944 | 0.05846718 |
| hsa-miR-19b-3p  |      | 45 | 2.77321309 | 0.00344355 | 0.36059256 | 0.06415842 |
| hsa-miR-29b-3p  |      | 45 | 2.64562458 | 0.00365236 | 0.37798258 | 0.06390679 |
| BNIP3L          | down | 45 | 2.98196393 | 0.00167115 | 0.33534946 | 0.09908324 |
| FOXO1           | up   | 45 | 2.9238477  | 0.0014055  | 0.34201508 | 0.0981829  |
| GINS2           | up   | 45 | 2.98997996 | 0.00267756 | 0.3344504  | 0.04846416 |
| IFITM3          | up   | 45 | 3.00935204 | 0.00268479 | 0.33229745 | 0.05442495 |
| LY6K            | down | 45 | 3.0240481  | 0.00247093 | 0.33068257 | 0.06197531 |
| PRSS8           | down | 45 | 2.95791583 | 0.00303116 | 0.33807588 | 0.04965079 |
| TRIP13          | up   | 45 | 2.98864395 | 0.00282033 | 0.33459991 | 0.06799557 |
| hsa-miR-29c-3p  |      | 44 | 2.71242485 | 0.00321918 | 0.36867381 | 0.06272614 |
| C4orf3          | down | 44 | 3.04809619 | 0.00186781 | 0.32807364 | 0.07757325 |
| PDLIM3          | down | 44 | 3.15297261 | 0.00317509 | 0.31716102 | 0.05540613 |
| PHYHIP          | down | 44 | 3.00467602 | 0.002951   | 0.33281458 | 0.07245725 |
| RAB31           | up   | 44 | 3.0240481  | 0.00195609 | 0.33068257 | 0.06793388 |
| SHISA5          | up   | 44 | 2.95724783 | 0.0011532  | 0.33815225 | 0.11772593 |
| TACC3           | up   | 44 | 2.9759519  | 0.00259777 | 0.33602694 | 0.09391496 |
| TP53INP2        | down | 44 | 2.96058784 | 0.00326258 | 0.33777076 | 0.08153493 |
| hsa-miR-19a-3p  |      | 43 | 2.79191717 | 0.00262927 | 0.35817682 | 0.06533181 |
| FBXO34          | down | 43 | 2.95657983 | 8.81E-04   | 0.33822865 | 0.09709475 |
| LPIN1           | down | 43 | 2.9245157  | 0.00142081 | 0.34193696 | 0.09617248 |
| MCAM            | up   | 43 | 2.96659987 | 0.00172126 | 0.33708624 | 0.07070343 |
| NCAPG           | up   | 43 | 2.95591182 | 0.00144815 | 0.33830508 | 0.08790024 |
| hsa-miR-1-3p    |      | 42 | 2.95156981 | 0.00383021 | 0.33880276 | 0.05482831 |
| hsa-miR-423-5p  |      | 42 | 2.66232465 | 0.00409001 | 0.37561159 | 0.06330366 |
| hsa-miR-215-5p  |      | 42 | 2.87274549 | 0.00257686 | 0.34809906 | 0.04980723 |
| LDHB            | up   | 42 | 2.96793587 | 6.24E-04   | 0.3369345  | 0.08640903 |
| USH1G           | down | 42 | 3.16566466 | 0.00191816 | 0.31588943 | 0.05938538 |
| hsa-miR-9-5p    |      | 41 | 2.83266533 | 0.00340732 | 0.35302441 | 0.05537199 |
| hsa-miR-301a-3p |      | 41 | 2.71309285 | 0.00303565 | 0.36858304 | 0.06824724 |

|                 |      |    |            |            |            |            |
|-----------------|------|----|------------|------------|------------|------------|
| LTBP4           | down | 41 | 2.98797595 | 0.00333732 | 0.33467471 | 0.04772004 |
| RHCG            | down | 41 | 3.07815631 | 0.00101111 | 0.32486979 | 0.06515202 |
| hsa-miR-25-3p   |      | 40 | 2.80126921 | 0.00246658 | 0.35698104 | 0.06487813 |
| hsa-miR-18a-5p  |      | 40 | 2.73046092 | 0.00280679 | 0.36623853 | 0.06765448 |
| NUCB2           | down | 40 | 2.95257181 | 0.00101078 | 0.33868778 | 0.09835244 |
| SLC16A5         | down | 40 | 3.04475618 | 0.00208057 | 0.32843352 | 0.05285978 |
| WNT4            | down | 40 | 3.02271209 | 0.00284158 | 0.33082873 | 0.05773585 |
| hsa-miR-484     |      | 39 | 2.81062124 | 0.00287609 | 0.35579323 | 0.0610176  |
| hsa-miR-22-5p   |      | 39 | 2.9502338  | 0.00208003 | 0.33895619 | 0.06212233 |
| FZD7            | down | 39 | 3.03340013 | 0.00104657 | 0.32966307 | 0.07149541 |
| MDFI            | up   | 39 | 3.05344021 | 0.00269738 | 0.32749945 | 0.05769231 |
| MTRNR2L6        | down | 39 | 3.19438878 | 0.00273326 | 0.31304893 | 0.08612755 |
| PRELP           | down | 39 | 3.22311289 | 9.45E-04   | 0.31025907 | 0.06336996 |
| hsa-miR-766-3p  |      | 38 | 2.71910488 | 0.00296009 | 0.36776809 | 0.06574843 |
| hsa-miR-145-5p  |      | 38 | 2.70374081 | 0.00495359 | 0.36985794 | 0.06439933 |
| CBX7            | down | 38 | 3.0487642  | 8.68E-04   | 0.32800175 | 0.07728313 |
| HAS3            | up   | 38 | 3.19171677 | 5.01E-04   | 0.31331101 | 0.08474015 |
| RND3            | down | 38 | 2.98196393 | 5.36E-04   | 0.33534946 | 0.10866678 |
| TTK             | up   | 38 | 2.9512358  | 9.08E-04   | 0.3388411  | 0.09330827 |
| hsa-miR-181d-5p |      | 37 | 2.87742151 | 0.00169707 | 0.34753337 | 0.07038494 |
| hsa-miR-224-5p  |      | 37 | 2.78056112 | 0.00286214 | 0.35963964 | 0.06199793 |
| hsa-miR-340-5p  |      | 37 | 2.85270541 | 0.00170978 | 0.35054443 | 0.06881882 |
| MGLL            | down | 37 | 2.9739479  | 0.00200559 | 0.33625337 | 0.06823905 |
| NTN4            | down | 37 | 2.92852371 | 7.40E-04   | 0.34146898 | 0.09983598 |
| RNF222          | down | 37 | 3.1997328  | 0.00250481 | 0.3125261  | 0.059193   |
| hsa-miR-138-5p  |      | 36 | 2.91082164 | 0.00332382 | 0.34354561 | 0.06028682 |
| AKR1B10         | up   | 36 | 3.06412826 | 0.00321488 | 0.3263571  | 0.0828976  |
| ELOVL4          | down | 36 | 3.02271209 | 7.31E-04   | 0.33082873 | 0.10168289 |
| RANBP9          | down | 36 | 2.94321977 | 0.00113696 | 0.33976396 | 0.11470037 |
| TIMP1           | up   | 36 | 2.95791583 | 0.0016553  | 0.33807588 | 0.06384863 |
| hsa-miR-362-3p  |      | 35 | 2.81930528 | 0.00238562 | 0.35469731 | 0.06454519 |
| hsa-miR-125b-5p |      | 35 | 2.86072144 | 0.00210726 | 0.34956217 | 0.06634556 |
| hsa-miR-590-3p  |      | 35 | 2.92150969 | 0.00139175 | 0.34228878 | 0.07255266 |
| hsa-miR-30e-3p  |      | 35 | 2.80527722 | 0.00261344 | 0.35647101 | 0.06965857 |
| hsa-miR-196a-5p |      | 35 | 2.88009352 | 0.00330517 | 0.34721095 | 0.06983895 |
| PPDPF           | down | 35 | 2.99866399 | 0.00173099 | 0.33348184 | 0.06145199 |
| hsa-miR-96-5p   |      | 34 | 2.83800935 | 0.00186198 | 0.35235966 | 0.07087618 |
| hsa-miR-940     |      | 34 | 2.93152973 | 0.00186746 | 0.34111883 | 0.0642541  |
| hsa-miR-375     |      | 34 | 2.8493654  | 0.00224474 | 0.35095534 | 0.06440198 |
| hsa-miR-130b-3p |      | 34 | 2.75450902 | 0.0024144  | 0.36304111 | 0.0747683  |
| SLC22A3         | up   | 34 | 3.03807615 | 0.00158718 | 0.32915567 | 0.08674878 |
| TMPRSS4         | up   | 34 | 3.12224449 | 6.39E-04   | 0.32028241 | 0.05938914 |
| hsa-miR-455-3p  |      | 33 | 2.98697395 | 0.00182742 | 0.33478698 | 0.06320847 |
| hsa-miR-519d-3p |      | 33 | 2.750501   | 0.00201973 | 0.36357013 | 0.07844278 |
| BCAR1           | up   | 33 | 3.02338009 | 7.35E-04   | 0.33075563 | 0.08500446 |
| BCL6            | up   | 33 | 2.93186373 | 0.00104687 | 0.34107997 | 0.09320358 |
| TOM1            | down | 33 | 3.00400802 | 0.0023565  | 0.33288859 | 0.05919192 |

|                  |      |    |            |            |            |            |
|------------------|------|----|------------|------------|------------|------------|
| VWA1             | up   | 33 | 3.11623246 | 8.54E-04   | 0.32090032 | 0.05432202 |
| hsa-miR-92b-3p   |      | 32 | 3.04175017 | 0.00138868 | 0.3287581  | 0.065042   |
| hsa-miR-181c-5p  |      | 32 | 2.99164997 | 0.00139404 | 0.3342637  | 0.07423501 |
| hsa-miR-378a-3p  |      | 32 | 2.76452906 | 0.00204123 | 0.36172526 | 0.07568454 |
| hsa-miR-30c-2-3p |      | 32 | 2.80527722 | 0.00277969 | 0.35647101 | 0.07379467 |
| hsa-miR-877-3p   |      | 32 | 2.91482966 | 0.00222742 | 0.34307322 | 0.06506264 |
| hsa-miR-221-5p   |      | 32 | 2.8246493  | 0.00272947 | 0.35402625 | 0.06349138 |
| hsa-miR-32-5p    |      | 32 | 3.0738143  | 0.00111723 | 0.3253287  | 0.06585338 |
| CTIF             | down | 32 | 3.04275217 | 7.63E-04   | 0.32864984 | 0.06711648 |
| DLGAP5           | up   | 32 | 3.05678023 | 5.86E-04   | 0.32714161 | 0.10220287 |
| MAD2L1           | up   | 32 | 3.01670007 | 9.44E-04   | 0.33148804 | 0.11688596 |
| TMEM173          | up   | 32 | 2.96526386 | 6.56E-04   | 0.33723812 | 0.1184506  |
| TPX2             | up   | 32 | 2.93186373 | 0.00131571 | 0.34107997 | 0.08610026 |
| ZNF273           | down | 32 | 2.96860387 | 0.00105543 | 0.33685869 | 0.09338127 |
| hsa-miR-342-3p   |      | 31 | 2.80594522 | 0.00178507 | 0.35638614 | 0.0802316  |
| hsa-miR-125a-3p  |      | 31 | 2.9008016  | 0.00208434 | 0.3447323  | 0.07144404 |
| hsa-miR-301b-3p  |      | 31 | 2.77054108 | 0.00201995 | 0.36094033 | 0.07898389 |
| MIEF2            | down | 31 | 3.12625251 | 9.34E-04   | 0.31987179 | 0.06468071 |
| PDPN             | up   | 31 | 3.23313293 | 4.95E-04   | 0.30929752 | 0.08172043 |
| PLAC8            | up   | 31 | 3.13560454 | 0.00272367 | 0.31891777 | 0.05816747 |
| ZNRF1            | down | 31 | 3.01135605 | 9.16E-04   | 0.33207631 | 0.12001273 |
| hsa-miR-197-3p   |      | 30 | 2.94622578 | 0.00226099 | 0.3394173  | 0.07456209 |
| hsa-miR-532-3p   |      | 30 | 2.86138945 | 0.00212546 | 0.34948056 | 0.07252381 |
| hsa-miR-20a-3p   |      | 30 | 2.98630595 | 0.00139612 | 0.33486187 | 0.07334433 |
| hsa-miR-143-3p   |      | 30 | 2.82732131 | 0.00191439 | 0.35369167 | 0.07954023 |
| ADIPOQ           | down | 30 | 3.38343353 | 6.09E-04   | 0.29555775 | 0.13030303 |
| hsa-miR-30a-3p   |      | 30 | 2.91349365 | 0.0015089  | 0.34323054 | 0.07358586 |
| hsa-miR-141-3p   |      | 30 | 2.97361389 | 0.00107725 | 0.33629114 | 0.07523035 |
| hsa-miR-374a-5p  |      | 30 | 2.86205745 | 0.00144131 | 0.349399   | 0.08546886 |
| hsa-miR-221-3p   |      | 30 | 2.84068136 | 0.00148091 | 0.35202822 | 0.07799534 |
| hsa-miR-152-3p   |      | 30 | 2.84602538 | 0.00135934 | 0.35136721 | 0.08226751 |
| PHC1             | down | 30 | 3.16232465 | 6.63E-04   | 0.31622307 | 0.08449612 |
| PRDX5            | down | 30 | 3.05477622 | 0.00120383 | 0.32735622 | 0.09263722 |
| hsa-miR-203a-3p  |      | 29 | 2.91616566 | 0.00158257 | 0.34291605 | 0.08462524 |
| ACTN1            | up   | 29 | 3.02070808 | 5.25E-04   | 0.33104821 | 0.09494568 |
| hsa-miR-338-3p   |      | 29 | 2.86606546 | 0.00158937 | 0.34891038 | 0.07782756 |
| hsa-miR-185-5p   |      | 29 | 2.90347361 | 0.00234519 | 0.34441505 | 0.07399479 |
| hsa-miR-939-5p   |      | 29 | 2.97227789 | 0.00176025 | 0.3364423  | 0.06796198 |
| hsa-miR-200b-3p  |      | 29 | 2.88744155 | 0.00156642 | 0.34632736 | 0.07523971 |
| hsa-miR-320a     |      | 29 | 2.8740815  | 0.00179968 | 0.34793725 | 0.07955255 |
| SLPI             | down | 29 | 3.07748831 | 5.56E-04   | 0.32494031 | 0.06843501 |
| hsa-miR-214-3p   |      | 28 | 3.12725451 | 0.00147188 | 0.3197693  | 0.06538735 |
| hsa-miR-21-3p    |      | 28 | 2.84402138 | 0.00150398 | 0.3516148  | 0.07849128 |
| hsa-miR-125a-5p  |      | 28 | 2.92217769 | 0.00133369 | 0.34221054 | 0.07614144 |
| hsa-miR-100-5p   |      | 28 | 3.06179025 | 0.00167532 | 0.32660631 | 0.07155785 |
| hsa-miR-200c-3p  |      | 28 | 2.95891784 | 0.00124453 | 0.3379614  | 0.07523582 |
| hsa-miR-140-3p   |      | 28 | 2.92752171 | 0.00126955 | 0.34158585 | 0.07683235 |

|                  |      |    |            |            |            |            |
|------------------|------|----|------------|------------|------------|------------|
| hsa-miR-425-5p   |      | 28 | 2.83400134 | 0.00147274 | 0.35285798 | 0.07613434 |
| CNST             | down | 28 | 3.03674015 | 5.45E-04   | 0.32930048 | 0.13117615 |
| SAMD9            | down | 28 | 3.03273213 | 0.00100534 | 0.32973568 | 0.10025974 |
| hsa-miR-3619-5p  |      | 27 | 3.09118236 | 0.00127048 | 0.32350081 | 0.06512928 |
| hsa-miR-615-3p   |      | 27 | 3.04375418 | 0.00113691 | 0.32854164 | 0.07073091 |
| hsa-miR-8485     |      | 27 | 3.02705411 | 0.00173582 | 0.33035419 | 0.06653245 |
| hsa-miR-130b-5p  |      | 27 | 2.99432198 | 0.0021514  | 0.33396542 | 0.07921982 |
| hsa-miR-204-5p   |      | 27 | 2.84402138 | 0.0017081  | 0.3516148  | 0.07936508 |
| hsa-miR-603      |      | 27 | 2.81997328 | 0.00163311 | 0.35461329 | 0.07913378 |
| ADH1B            | down | 27 | 3.16900468 | 5.71E-04   | 0.31555649 | 0.09140134 |
| hsa-miR-222-3p   |      | 27 | 2.95357381 | 0.00122792 | 0.33857288 | 0.08191446 |
| hsa-miR-330-3p   |      | 27 | 2.94488978 | 0.00137291 | 0.33957128 | 0.07880159 |
| hsa-miR-449a     |      | 27 | 2.93353373 | 0.00130607 | 0.3408858  | 0.07853568 |
| hsa-miR-199a-3p  |      | 27 | 2.85203741 | 0.00195898 | 0.35062654 | 0.07669153 |
| DCBLD1           | up   | 27 | 2.9739479  | 5.25E-04   | 0.33625337 | 0.13058651 |
| ELF3             | down | 27 | 3.04141617 | 4.88E-04   | 0.3287942  | 0.07365948 |
| IDH3A            | up   | 27 | 3.01402806 | 8.31E-04   | 0.33178191 | 0.08946446 |
| LEPR             | down | 27 | 2.99198397 | 3.74E-04   | 0.33422639 | 0.08767718 |
| PAQR8            | down | 27 | 3.0253841  | 0.00101984 | 0.33053654 | 0.06338553 |
| TXNDC5           | up   | 27 | 3.00801603 | 5.13E-04   | 0.33244504 | 0.11503557 |
| hsa-miR-146a-5p  |      | 26 | 2.99832999 | 0.00105855 | 0.33351899 | 0.07756517 |
| hsa-miR-942-5p   |      | 26 | 3.04642619 | 0.00138265 | 0.32825348 | 0.07743453 |
| hsa-miR-186-3p   |      | 26 | 2.90948564 | 0.0015726  | 0.34370336 | 0.08455755 |
| hsa-miR-744-5p   |      | 26 | 3.11857047 | 0.00117171 | 0.32065974 | 0.06846833 |
| hsa-miR-149-3p   |      | 26 | 3.02638611 | 0.00140145 | 0.33042711 | 0.08049474 |
| KIF20A           | up   | 26 | 3.02805611 | 3.06E-04   | 0.33024487 | 0.11014613 |
| MYZAP            | down | 26 | 3.17167669 | 7.90E-04   | 0.31529065 | 0.09991405 |
| SMPD1            | down | 26 | 3.04342017 | 0.00127297 | 0.3285777  | 0.08988604 |
| hsa-miR-93-3p    |      | 25 | 3.10587842 | 9.51E-04   | 0.3219701  | 0.08107383 |
| hsa-miR-129-5p   |      | 25 | 2.86673347 | 0.00135351 | 0.34882908 | 0.08725448 |
| hsa-miR-30b-3p   |      | 25 | 3.02104208 | 0.00126583 | 0.33101161 | 0.08205832 |
| hsa-miR-548c-5p  |      | 25 | 2.92150969 | 9.27E-04   | 0.34228878 | 0.10388423 |
| hsa-miR-454-3p   |      | 25 | 2.9008016  | 0.00107664 | 0.3447323  | 0.08988864 |
| hsa-miR-126-5p   |      | 25 | 2.98897796 | 0.00108824 | 0.33456252 | 0.0800659  |
| hsa-miR-92a-1-5p |      | 25 | 3.10587842 | 7.07E-04   | 0.3219701  | 0.0732757  |
| BGN              | down | 25 | 3.10487642 | 2.92E-04   | 0.32207401 | 0.08313725 |
| hsa-miR-29a-5p   |      | 25 | 2.94622578 | 0.00122691 | 0.3394173  | 0.08046948 |
| hsa-miR-196b-5p  |      | 25 | 3.03239813 | 8.12E-04   | 0.329772   | 0.08428198 |
| CDKN3            | up   | 25 | 3.01536406 | 0.0012017  | 0.33163491 | 0.09342105 |
| DTX2             | down | 25 | 3.14428858 | 5.10E-04   | 0.31803697 | 0.08844444 |
| FLNC             | up   | 25 | 2.99732799 | 4.66E-04   | 0.33363049 | 0.14862745 |
| OSBPL1A          | down | 25 | 3.06346025 | 0.00118298 | 0.32642826 | 0.11827451 |
| PRDX6            | down | 25 | 3.03540414 | 0.00169826 | 0.32944542 | 0.14681319 |
| RUSC2            | down | 25 | 3.11222445 | 8.43E-04   | 0.32131359 | 0.0789899  |
| hsa-miR-140-5p   |      | 24 | 2.96492986 | 0.00110511 | 0.33727611 | 0.08719691 |
| hsa-miR-542-3p   |      | 24 | 3.07982632 | 0.00137489 | 0.32469363 | 0.07993513 |
| hsa-miR-548j-5p  |      | 24 | 2.95223781 | 8.06E-04   | 0.3387261  | 0.10272082 |



|                  |      |    |            |            |            |            |
|------------------|------|----|------------|------------|------------|------------|
| hsa-miR-23b-5p   |      | 24 | 3.26352705 | 6.42E-04   | 0.30641695 | 0.06896374 |
| hsa-let-7a-3p    |      | 24 | 2.93219773 | 0.00106831 | 0.34104112 | 0.08996285 |
| hsa-miR-324-3p   |      | 24 | 3.04709419 | 8.37E-04   | 0.32818152 | 0.07860939 |
| hsa-miR-149-5p   |      | 24 | 2.98897796 | 0.00106769 | 0.33456252 | 0.07764529 |
| hsa-miR-877-5p   |      | 24 | 3.16800267 | 7.00E-04   | 0.3156563  | 0.07758772 |
| hsa-miR-330-5p   |      | 24 | 2.92351369 | 0.00153048 | 0.34205415 | 0.07746255 |
| hsa-miR-331-3p   |      | 24 | 3.03841015 | 9.48E-04   | 0.32911949 | 0.0838811  |
| hsa-miR-200a-3p  |      | 24 | 3.02905812 | 7.31E-04   | 0.33013563 | 0.08709164 |
| hsa-miR-18b-5p   |      | 24 | 2.85470942 | 0.00119929 | 0.35029835 | 0.09068454 |
| CDC20            | up   | 24 | 2.97127589 | 2.40E-04   | 0.33655576 | 0.12220603 |
| CSTB             | down | 24 | 3.03273213 | 2.56E-04   | 0.32973568 | 0.0946702  |
| FBLN2            | down | 24 | 3.15764863 | 3.23E-04   | 0.31669135 | 0.07167431 |
| GTSE1            | up   | 24 | 2.99465598 | 3.21E-04   | 0.33392817 | 0.12106918 |
| HILPDA           | down | 24 | 3.08149633 | 3.74E-04   | 0.32451767 | 0.09106335 |
| HSPA2            | down | 24 | 3.14295257 | 0.0014489  | 0.31817216 | 0.08181424 |
| MAFF             | down | 24 | 3.02738811 | 5.25E-04   | 0.33031774 | 0.07836645 |
| NDRG4            | down | 24 | 3.16232465 | 2.73E-04   | 0.31622307 | 0.09736842 |
| PADI1            | down | 24 | 3.31462926 | 3.40E-04   | 0.30169287 | 0.09061489 |
| RNASEK           | down | 24 | 3.02872411 | 0.00143647 | 0.33017203 | 0.09135166 |
| RPTN             | down | 24 | 3.29258517 | 3.83E-04   | 0.30371272 | 0.07066993 |
| SLIT3            | down | 24 | 3.13159653 | 5.99E-04   | 0.31932594 | 0.08152174 |
| SULF2            | down | 24 | 3.06346025 | 6.80E-04   | 0.32642826 | 0.11816667 |
| SYT15            | down | 24 | 3.11756847 | 8.65E-04   | 0.3207628  | 0.08352359 |
| hsa-miR-579-3p   |      | 23 | 3.03774215 | 7.54E-04   | 0.32919186 | 0.0908018  |
| hsa-miR-193a-3p  |      | 23 | 3.03707415 | 0.00137364 | 0.32926427 | 0.08182578 |
| hsa-miR-30c-1-3p |      | 23 | 3.00835003 | 0.00114629 | 0.33240813 | 0.08659116 |
| hsa-miR-335-3p   |      | 23 | 3.04175017 | 0.00103091 | 0.3287581  | 0.08924686 |
| hsa-miR-19b-1-5p |      | 23 | 2.95424182 | 8.68E-04   | 0.33849633 | 0.10418311 |
| hsa-miR-671-5p   |      | 23 | 2.9749499  | 8.53E-04   | 0.33614011 | 0.0837255  |
| hsa-miR-142-3p   |      | 23 | 3.13059452 | 8.78E-04   | 0.31942814 | 0.08173222 |
| hsa-miR-183-5p   |      | 23 | 2.84268537 | 0.00137526 | 0.35178005 | 0.09189173 |
| hsa-miR-526b-3p  |      | 23 | 2.85203741 | 0.00115975 | 0.35062654 | 0.09601322 |
| hsa-miR-582-5p   |      | 23 | 3.04642619 | 8.71E-04   | 0.32825348 | 0.08253956 |
| hsa-miR-625-5p   |      | 23 | 2.91549766 | 0.001121   | 0.34299462 | 0.08065628 |
| DIO2             | up   | 23 | 3.26386106 | 0.00169602 | 0.30638559 | 0.06472703 |
| LSP1             | down | 23 | 3.16900468 | 7.54E-04   | 0.31555649 | 0.06441224 |
| NNMT             | up   | 23 | 3.04809619 | 2.84E-04   | 0.32807364 | 0.11230485 |
| USP2             | down | 23 | 3.0240481  | 3.62E-04   | 0.33068257 | 0.09293291 |
| VASN             | down | 23 | 2.96125585 | 7.07E-04   | 0.33769456 | 0.08695652 |
| hsa-miR-374b-5p  |      | 22 | 3.03573814 | 6.81E-04   | 0.32940918 | 0.0952362  |
| hsa-miR-99a-5p   |      | 22 | 3.06245825 | 0.00130585 | 0.32653506 | 0.08262225 |
| hsa-miR-18a-3p   |      | 22 | 3.02037408 | 9.54E-04   | 0.33108482 | 0.08400558 |
| hsa-miR-32-3p    |      | 22 | 3.01102204 | 8.24E-04   | 0.33211314 | 0.09079392 |
| hsa-miR-574-5p   |      | 22 | 3.05511022 | 9.88E-04   | 0.32732043 | 0.07849026 |
| hsa-miR-205-5p   |      | 22 | 3.31496326 | 7.10E-04   | 0.30166247 | 0.07793972 |
| APOBEC3A         | up   | 22 | 3.28456914 | 2.65E-04   | 0.30445394 | 0.092      |
| hsa-miR-378a-5p  |      | 22 | 3.12925852 | 0.00112416 | 0.31956452 | 0.07298778 |

|                   |      |    |            |            |            |            |
|-------------------|------|----|------------|------------|------------|------------|
| hsa-miR-181a-2-3p |      | 22 | 3.10721443 | 6.22E-04   | 0.32183167 | 0.08877159 |
| hsa-miR-421       |      | 22 | 3.11656647 | 5.62E-04   | 0.32086593 | 0.08914043 |
| hsa-miR-513a-5p   |      | 22 | 3.01169005 | 8.89E-04   | 0.33203948 | 0.08146499 |
| hsa-miR-769-3p    |      | 22 | 3.03707415 | 8.72E-04   | 0.32926427 | 0.08535133 |
| hsa-let-7g-3p     |      | 22 | 2.96092184 | 0.00100789 | 0.33773266 | 0.09134199 |
| hsa-miR-302c-3p   |      | 22 | 2.90814963 | 0.00106739 | 0.34386126 | 0.09668002 |
| FBXO32            | down | 22 | 3.02338009 | 4.35E-04   | 0.33075563 | 0.12824117 |
| FHL1              | down | 22 | 3.00200401 | 8.61E-04   | 0.33311081 | 0.11815359 |
| ITM2A             | down | 22 | 3.06613226 | 0.00198652 | 0.32614379 | 0.08034217 |
| LAMB2             | down | 22 | 3.09819639 | 2.16E-04   | 0.32276843 | 0.09752454 |
| SMDT1             | down | 22 | 3.1255845  | 3.19E-04   | 0.31994016 | 0.13678845 |
| SNCG              | down | 22 | 2.97728791 | 6.21E-04   | 0.33587615 | 0.14199633 |
| hsa-miR-1910-5p   |      | 21 | 3.20273881 | 5.92E-04   | 0.31223277 | 0.08460317 |
| hsa-miR-548d-3p   |      | 21 | 3.03373413 | 7.62E-04   | 0.32962678 | 0.0916832  |
| hsa-miR-1304-3p   |      | 21 | 3.16399466 | 0.00113506 | 0.31605616 | 0.08185917 |
| hsa-miR-1277-5p   |      | 21 | 3.13527054 | 7.59E-04   | 0.31895174 | 0.0868431  |
| hsa-miR-4728-5p   |      | 21 | 3.11523046 | 9.62E-04   | 0.32100354 | 0.09215849 |
| hsa-miR-6883-5p   |      | 21 | 3.11523046 | 9.62E-04   | 0.32100354 | 0.09215849 |
| hsa-miR-6785-5p   |      | 21 | 3.11523046 | 9.62E-04   | 0.32100354 | 0.09215849 |
| hsa-miR-485-5p    |      | 21 | 2.98430194 | 9.66E-04   | 0.33508674 | 0.08644986 |
| hsa-miR-766-5p    |      | 21 | 3.03306613 | 8.31E-04   | 0.32969937 | 0.09065775 |
| ALDH3B1           | down | 21 | 3.13961256 | 4.58E-04   | 0.31851064 | 0.16380952 |
| hsa-miR-548d-5p   |      | 21 | 2.94689379 | 7.90E-04   | 0.33934036 | 0.11551339 |
| hsa-miR-503-5p    |      | 21 | 3.05577822 | 6.14E-04   | 0.32724888 | 0.09481293 |
| BCAM              | down | 21 | 3.07815631 | 6.14E-04   | 0.32486979 | 0.09099299 |
| CAPS              | down | 21 | 3.32331329 | 2.53E-04   | 0.30090452 | 0.1052381  |
| CCL2              | up   | 21 | 2.95925184 | 3.69E-04   | 0.33792325 | 0.10858683 |
| hsa-miR-34a-3p    |      | 21 | 2.92150969 | 0.0011261  | 0.34228878 | 0.09559885 |
| hsa-miR-15a-3p    |      | 21 | 3.14195057 | 7.65E-04   | 0.31827363 | 0.08606951 |
| EDN2              | down | 21 | 3.26586506 | 0.00101896 | 0.30619759 | 0.07110682 |
| GSTM3             | down | 21 | 3.26720107 | 3.19E-04   | 0.30607238 | 0.09054326 |
| MT2A              | up   | 21 | 3.08951236 | 0.00152855 | 0.32367568 | 0.09324567 |
| PLA2G4D           | down | 21 | 3.28924516 | 3.96E-04   | 0.30402112 | 0.07008086 |
| PTGES             | up   | 21 | 3.03139613 | 3.72E-04   | 0.329881   | 0.08357964 |
| RASGEF1B          | down | 21 | 3.0253841  | 9.45E-04   | 0.33053654 | 0.12287276 |
| TUSC3             | up   | 21 | 3.01135605 | 8.25E-04   | 0.33207631 | 0.14959115 |
| hsa-miR-33a-5p    |      | 20 | 3.18470274 | 4.99E-04   | 0.31400105 | 0.09281857 |
| hsa-miR-629-3p    |      | 20 | 3.09318637 | 0.00117561 | 0.32329122 | 0.08784038 |
| hsa-miR-301a-5p   |      | 20 | 3.06179025 | 8.79E-04   | 0.32660631 | 0.09190647 |
| hsa-miR-874-3p    |      | 20 | 3.18470274 | 6.95E-04   | 0.31400105 | 0.09535135 |
| hsa-miR-6825-5p   |      | 20 | 3.27020708 | 7.61E-04   | 0.30579103 | 0.0810794  |
| hsa-miR-3613-3p   |      | 20 | 2.90414162 | 0.001274   | 0.34433583 | 0.09178439 |
| hsa-miR-142-5p    |      | 20 | 2.96092184 | 9.37E-04   | 0.33773266 | 0.09710777 |
| hsa-miR-361-5p    |      | 20 | 3.18069472 | 4.30E-04   | 0.31439672 | 0.09567308 |
| hsa-miR-324-5p    |      | 20 | 3.21543086 | 7.18E-04   | 0.31100031 | 0.08858757 |
| hsa-miR-33a-3p    |      | 20 | 3.0490982  | 9.86E-04   | 0.32796582 | 0.09328028 |
| hsa-miR-450b-5p   |      | 20 | 2.91750167 | 0.0010503  | 0.34275902 | 0.10456604 |

|                   |    |            |            |            |            |
|-------------------|----|------------|------------|------------|------------|
| hsa-miR-548f-3p   | 20 | 2.98764195 | 8.13E-04   | 0.33471213 | 0.10098361 |
| hsa-miR-361-3p    | 20 | 3.10320641 | 8.04E-04   | 0.32224734 | 0.08342857 |
| hsa-miR-7-1-3p    | 20 | 2.94822979 | 8.19E-04   | 0.33918659 | 0.10257813 |
| hsa-miR-548o-5p   | 20 | 3.01569806 | 5.86E-04   | 0.33159818 | 0.11767205 |
| hsa-miR-548am-5p  | 20 | 3.01569806 | 5.86E-04   | 0.33159818 | 0.11767205 |
| hsa-miR-765       | 20 | 3.07181029 | 0.00109457 | 0.32554094 | 0.08509572 |
| CYP3A5 down       | 20 | 3.17969272 | 6.69E-04   | 0.3144958  | 0.06502347 |
| GOLGA6L4 down     | 20 | 3.32197729 | 0.00237213 | 0.30102554 | 0.0954918  |
| HLA-DQA1 down     | 20 | 3.13827655 | 3.88E-04   | 0.31864623 | 0.11384615 |
| PDIA4 up          | 20 | 2.9752839  | 2.21E-04   | 0.33610238 | 0.14508671 |
| PLAT up           | 20 | 3.03807615 | 2.82E-04   | 0.32915567 | 0.0859322  |
| PLAU up           | 20 | 2.99465598 | 0.00147957 | 0.33392817 | 0.12523511 |
| SPTSSB down       | 20 | 3.01870407 | 2.79E-04   | 0.33126798 | 0.14134948 |
| TNFAIP8L3 down    | 20 | 3.41750167 | 2.76E-04   | 0.29261142 | 0.10232558 |
| TUBB3 up          | 20 | 2.999332   | 2.04E-04   | 0.33340757 | 0.12088608 |
| hsa-miR-10a-5p    | 19 | 3.20140281 | 4.59E-04   | 0.31236307 | 0.09064005 |
| hsa-miR-143-5p    | 19 | 3.19873079 | 8.28E-04   | 0.31262399 | 0.07984286 |
| hsa-miR-1229-3p   | 19 | 3.15865063 | 0.00127899 | 0.31659089 | 0.08960418 |
| hsa-miR-1224-3p   | 19 | 3.04308617 | 0.00164546 | 0.32861376 | 0.09013967 |
| hsa-miR-2355-5p   | 19 | 3.02104208 | 0.00100184 | 0.33101161 | 0.08819709 |
| ADAMTS14 down     | 19 | 3.37675351 | 1.67E-04   | 0.29614243 | 0.12030075 |
| hsa-miR-190a-3p   | 19 | 3.05310621 | 8.17E-04   | 0.32753528 | 0.09162658 |
| AGFG2 down        | 19 | 2.98463594 | 1.91E-04   | 0.33504924 | 0.15150593 |
| hsa-miR-2110      | 19 | 3.26619906 | 5.05E-04   | 0.30616627 | 0.08897398 |
| hsa-miR-31-5p     | 19 | 3.03239813 | 7.34E-04   | 0.329772   | 0.09734795 |
| hsa-miR-665       | 19 | 3.03039412 | 8.59E-04   | 0.32999008 | 0.0981336  |
| hsa-miR-1260a     | 19 | 3.00501002 | 8.54E-04   | 0.33277759 | 0.09298246 |
| hsa-miR-873-5p    | 19 | 3.0738143  | 6.93E-04   | 0.3253287  | 0.09522666 |
| hsa-miR-302a-3p   | 19 | 2.94154977 | 7.81E-04   | 0.33995685 | 0.10933681 |
| CRLF1 down        | 19 | 3.01002004 | 2.58E-04   | 0.3322237  | 0.10458839 |
| KRT10 down        | 19 | 3.14028056 | 2.54E-04   | 0.31844288 | 0.17899948 |
| LAMC2 up          | 19 | 3.0487642  | 1.66E-04   | 0.32800175 | 0.14589783 |
| MX2 down          | 19 | 3.38009352 | 2.56E-04   | 0.2958498  | 0.08988764 |
| RPS4Y1 up         | 19 | 3.12959252 | 0.00150209 | 0.31953042 | 0.10553728 |
| S100A2 up         | 19 | 3.06479626 | 0.00165054 | 0.32628596 | 0.0853062  |
| STAC down         | 19 | 3.27788911 | 2.80E-04   | 0.30507438 | 0.08054226 |
| UHRF1 up          | 19 | 3.02271209 | 3.08E-04   | 0.33082873 | 0.12234685 |
| hsa-miR-660-3p    | 18 | 3.02037408 | 0.0010341  | 0.33108482 | 0.09646636 |
| hsa-miR-132-3p    | 18 | 3.19672679 | 0.00115231 | 0.31281998 | 0.09904971 |
| hsa-miR-3929      | 18 | 3.13126253 | 7.12E-04   | 0.31936    | 0.09389439 |
| hsa-miR-5011-5p   | 18 | 3.10521042 | 7.24E-04   | 0.32203937 | 0.09026455 |
| hsa-miR-329-3p    | 18 | 3.18737475 | 5.82E-04   | 0.31373782 | 0.08585859 |
| hsa-miR-1305      | 18 | 3.19138277 | 5.74E-04   | 0.3133438  | 0.0964247  |
| hsa-miR-19a-5p    | 18 | 3.11790247 | 4.97E-04   | 0.32072844 | 0.11062615 |
| hsa-miR-141-5p    | 18 | 3.10320641 | 5.00E-04   | 0.32224734 | 0.09931217 |
| hsa-miR-1827      | 18 | 3.21676687 | 7.37E-04   | 0.31087115 | 0.0864267  |
| hsa-miR-125b-2-3p | 18 | 3.12057448 | 5.66E-04   | 0.32045382 | 0.09830729 |

|                 |    |            |            |            |            |
|-----------------|----|------------|------------|------------|------------|
| hsa-miR-545-3p  | 18 | 3.02171009 | 6.89E-04   | 0.33093843 | 0.10020857 |
| hsa-miR-1260b   | 18 | 3.14529058 | 5.45E-04   | 0.31793565 | 0.09872183 |
| hsa-miR-211-5p  | 18 | 2.93887776 | 9.91E-04   | 0.34026594 | 0.10408635 |
| hsa-miR-16-2-3p | 18 | 3.12257849 | 5.29E-04   | 0.32024815 | 0.10343889 |
| hsa-miR-27a-5p  | 18 | 3.22277889 | 3.45E-04   | 0.31029122 | 0.09265601 |
| hsa-miR-148a-5p | 18 | 3.08049432 | 0.00139831 | 0.32462322 | 0.10880484 |
| hsa-miR-320b    | 18 | 2.998998   | 7.66E-04   | 0.3334447  | 0.10614011 |
| hsa-miR-9-3p    | 18 | 3.20741483 | 3.90E-04   | 0.31177757 | 0.09769903 |
| hsa-miR-486-5p  | 18 | 3.2254509  | 3.81E-04   | 0.31003417 | 0.09993614 |
| BEX4 down       | 18 | 3.14629259 | 1.46E-04   | 0.31783439 | 0.11900585 |
| hsa-miR-298     | 18 | 3.0250501  | 8.62E-04   | 0.33057304 | 0.10240677 |
| C15orf48 down   | 18 | 3.33132933 | 0.00122171 | 0.30018047 | 0.07528557 |
| hsa-miR-4458    | 18 | 2.93420174 | 7.34E-04   | 0.3408082  | 0.10633947 |
| hsa-miR-520a-3p | 18 | 2.98296593 | 6.23E-04   | 0.33523682 | 0.11269068 |
| hsa-miR-296-5p  | 18 | 3.04442218 | 9.62E-04   | 0.32846956 | 0.09773482 |
| hsa-miR-185-3p  | 18 | 3.11923848 | 7.78E-04   | 0.32059107 | 0.09217907 |
| CDCA5 up        | 18 | 2.99599198 | 1.49E-04   | 0.33377926 | 0.14849429 |
| CSRNP1 down     | 18 | 3.04809619 | 1.36E-04   | 0.32807364 | 0.12446989 |
| DYNAP up        | 18 | 3.50567802 | 1.18E-04   | 0.28525152 | 0.12173203 |
| KIFC3 down      | 18 | 3.06145625 | 4.60E-04   | 0.32664194 | 0.12998304 |
| MUC21 down      | 18 | 3.23112892 | 1.19E-04   | 0.30948935 | 0.13677918 |
| NPPC down       | 18 | 3.10821643 | 7.94E-04   | 0.32172792 | 0.18948413 |
| VMAC down       | 18 | 3.26720107 | 0.00210385 | 0.30607238 | 0.0913371  |
| ACSF2 down      | 17 | 2.99665999 | 3.65E-04   | 0.33370486 | 0.10499109 |
| hsa-miR-4459    | 17 | 3.13193053 | 6.02E-04   | 0.31929188 | 0.09759621 |
| hsa-miR-1224-5p | 17 | 3.15798263 | 7.39E-04   | 0.31665785 | 0.09749455 |
| hsa-miR-1304-5p | 17 | 3.34168337 | 2.93E-04   | 0.29925037 | 0.09633297 |
| hsa-miR-146b-5p | 17 | 3.18203073 | 3.32E-04   | 0.31426472 | 0.10788512 |
| hsa-miR-1301-3p | 17 | 3.20607882 | 7.55E-04   | 0.31190749 | 0.08924724 |
| hsa-miR-486-3p  | 17 | 3.10988644 | 6.71E-04   | 0.32155515 | 0.09677602 |
| hsa-miR-5699-3p | 17 | 3.10587842 | 5.71E-04   | 0.3219701  | 0.10221427 |
| hsa-miR-365a-3p | 17 | 3.18737475 | 6.43E-04   | 0.31373782 | 0.09820861 |
| hsa-miR-7977    | 17 | 3.10921844 | 0.00114554 | 0.32162423 | 0.09529975 |
| hsa-let-7f-1-3p | 17 | 3.14061456 | 4.88E-04   | 0.31840902 | 0.10783334 |
| hsa-let-7b-3p   | 17 | 3.01302605 | 6.70E-04   | 0.33189225 | 0.10810677 |
| hsa-miR-7106-5p | 17 | 3.29158317 | 5.35E-04   | 0.30380518 | 0.10314883 |
| hsa-miR-1914-3p | 17 | 3.04709419 | 7.21E-04   | 0.32818152 | 0.10039767 |
| hsa-miR-377-5p  | 17 | 3.18871075 | 4.33E-04   | 0.31360637 | 0.10282989 |
| hsa-miR-30d-3p  | 17 | 3.05778223 | 6.19E-04   | 0.32703441 | 0.10049458 |
| hsa-miR-1343-3p | 17 | 3.0744823  | 8.56E-04   | 0.32525801 | 0.0964663  |
| hsa-miR-4284    | 17 | 3.15597862 | 9.08E-04   | 0.31685893 | 0.09075117 |
| ARHGAP23 up     | 17 | 3.09752839 | 7.54E-04   | 0.32283804 | 0.19846317 |
| hsa-miR-4726-3p | 17 | 3.18136273 | 5.52E-04   | 0.31433071 | 0.08748275 |
| hsa-miR-1226-3p | 17 | 3.27154309 | 6.21E-04   | 0.30566616 | 0.09338235 |
| hsa-miR-188-3p  | 17 | 3.05377422 | 0.00106885 | 0.32746363 | 0.09989589 |
| hsa-miR-320c    | 17 | 3.03707415 | 6.71E-04   | 0.32926427 | 0.1108558  |
| hsa-miR-561-3p  | 17 | 2.9509018  | 6.51E-04   | 0.33887946 | 0.12409095 |

|                 |    |            |            |            |            |
|-----------------|----|------------|------------|------------|------------|
| hsa-miR-339-5p  | 17 | 3.22745491 | 5.35E-04   | 0.30984166 | 0.08941176 |
| CAMK1D down     | 17 | 3.15297261 | 4.85E-04   | 0.31716102 | 0.10843731 |
| hsa-miR-491-5p  | 17 | 3.1746827  | 5.95E-04   | 0.31499211 | 0.09832817 |
| hsa-miR-495-3p  | 17 | 3.06513026 | 4.35E-04   | 0.32625041 | 0.11525802 |
| hsa-miR-744-3p  | 17 | 3.21275885 | 4.86E-04   | 0.31125897 | 0.10050119 |
| COL14A1 down    | 17 | 3.21910488 | 6.83E-04   | 0.31064536 | 0.11005693 |
| FBLN1 down      | 17 | 3.09619238 | 1.05E-04   | 0.32297735 | 0.11520737 |
| HOPX down       | 17 | 3.48697395 | 3.59E-04   | 0.28678161 | 0.09141494 |
| SLC24A3 down    | 17 | 3.23580494 | 2.20E-04   | 0.30904211 | 0.09904844 |
| ABI3BP down     | 16 | 3.16566466 | 1.02E-04   | 0.31588943 | 0.15350275 |
| hsa-miR-137     | 16 | 3.18670675 | 4.32E-04   | 0.31380358 | 0.11173222 |
| hsa-miR-651-5p  | 16 | 3.08517034 | 5.44E-04   | 0.32413121 | 0.10876623 |
| hsa-miR-505-5p  | 16 | 3.36706747 | 2.91E-04   | 0.29699435 | 0.10792868 |
| hsa-miR-548k    | 16 | 3.03707415 | 4.81E-04   | 0.32926427 | 0.12646739 |
| hsa-miR-4511    | 16 | 3.17201069 | 5.16E-04   | 0.31525745 | 0.10515559 |
| hsa-miR-548l    | 16 | 3.02237809 | 5.78E-04   | 0.33086529 | 0.11791951 |
| hsa-miR-769-5p  | 16 | 3.10988644 | 4.75E-04   | 0.32155515 | 0.10768217 |
| hsa-miR-377-3p  | 16 | 3.07782231 | 7.56E-04   | 0.32490505 | 0.11024703 |
| hsa-miR-363-3p  | 16 | 3.26887108 | 3.42E-04   | 0.30591601 | 0.10831796 |
| hsa-miR-127-5p  | 16 | 2.9756179  | 7.27E-04   | 0.33606465 | 0.11468398 |
| hsa-miR-6838-5p | 16 | 3.08049432 | 5.09E-04   | 0.32462322 | 0.10454963 |
| hsa-miR-3179    | 16 | 2.92885772 | 0.00107622 | 0.34143004 | 0.10564117 |
| hsa-miR-374b-3p | 16 | 3.32164329 | 3.85E-04   | 0.30105581 | 0.10180764 |
| hsa-miR-1307-3p | 16 | 3.15865063 | 0.00143232 | 0.31659089 | 0.09522285 |
| hsa-miR-501-3p  | 16 | 3.12925852 | 5.60E-04   | 0.31956452 | 0.09494838 |
| hsa-miR-34c-5p  | 16 | 3.07247829 | 4.35E-04   | 0.32547016 | 0.11770738 |
| hsa-miR-576-3p  | 16 | 2.99832999 | 7.58E-04   | 0.33351899 | 0.11581338 |
| hsa-miR-6778-3p | 16 | 3.29759519 | 9.13E-04   | 0.30325129 | 0.09021739 |
| hsa-miR-1306-5p | 16 | 2.98764195 | 7.53E-04   | 0.33471213 | 0.11169454 |
| BLVRA down      | 16 | 3.20240481 | 9.75E-04   | 0.31226533 | 0.09898844 |
| hsa-miR-488-3p  | 16 | 3.21275885 | 3.95E-04   | 0.31125897 | 0.09808445 |
| hsa-miR-505-3p  | 16 | 3.06579826 | 5.41E-04   | 0.32617932 | 0.11638514 |
| hsa-miR-548e-3p | 16 | 3.03239813 | 5.90E-04   | 0.329772   | 0.11636442 |
| hsa-miR-302d-3p | 16 | 3.00567802 | 6.11E-04   | 0.33270363 | 0.12135113 |
| hsa-miR-302b-3p | 16 | 3.00567802 | 6.11E-04   | 0.33270363 | 0.12135113 |
| hsa-miR-4685-3p | 16 | 3.06045424 | 5.21E-04   | 0.32674888 | 0.11071909 |
| hsa-miR-4500    | 16 | 2.94422178 | 6.96E-04   | 0.33964833 | 0.11507552 |
| hsa-miR-133a-3p | 16 | 3.11857047 | 5.65E-04   | 0.32065974 | 0.10772308 |
| FABP3 down      | 16 | 3.18904476 | 9.30E-04   | 0.31357352 | 0.09114583 |
| FAM111B up      | 16 | 3.05544422 | 8.77E-05   | 0.32728465 | 0.12949811 |
| HMMR up         | 16 | 3.00668003 | 8.76E-05   | 0.33259276 | 0.16327362 |
| LYVE1 down      | 16 | 3.23513694 | 2.03E-04   | 0.30910593 | 0.08850671 |
| hsa-miR-641     | 15 | 3.1993988  | 4.41E-04   | 0.31255872 | 0.09934354 |
| hsa-miR-33b-5p  | 15 | 3.26887108 | 2.80E-04   | 0.30591601 | 0.11367204 |
| hsa-miR-500a-3p | 15 | 3.16466266 | 4.42E-04   | 0.31598945 | 0.10890269 |
| hsa-miR-548n    | 15 | 3.20674683 | 2.81E-04   | 0.31184252 | 0.12017738 |
| hsa-miR-664a-3p | 15 | 3.32231129 | 2.56E-04   | 0.30099527 | 0.11456044 |

|                   |    |            |            |            |            |
|-------------------|----|------------|------------|------------|------------|
| hsa-miR-151a-5p   | 15 | 3.26085504 | 5.62E-04   | 0.30666803 | 0.09967638 |
| hsa-miR-338-5p    | 15 | 3.16867067 | 4.98E-04   | 0.31558975 | 0.10581679 |
| hsa-miR-29b-2-5p  | 15 | 3.12324649 | 4.43E-04   | 0.32017966 | 0.11130661 |
| hsa-miR-941       | 15 | 3.27955912 | 2.73E-04   | 0.30491903 | 0.10142022 |
| hsa-miR-6077      | 15 | 2.95557782 | 8.64E-04   | 0.33834332 | 0.11402407 |
| hsa-miR-150-5p    | 15 | 3.26085504 | 4.21E-04   | 0.30666803 | 0.10322841 |
| hsa-miR-4796-3p   | 15 | 3.03573814 | 4.57E-04   | 0.32940918 | 0.12433679 |
| hsa-miR-3609      | 15 | 2.99098196 | 5.34E-04   | 0.33433836 | 0.12515003 |
| hsa-miR-144-3p    | 15 | 2.99164997 | 6.05E-04   | 0.3342637  | 0.12426972 |
| hsa-miR-5010-3p   | 15 | 3.12792251 | 3.59E-04   | 0.31970101 | 0.12495088 |
| ARHGAP27 down     | 15 | 3.0507682  | 0.00104926 | 0.32778629 | 0.10203106 |
| hsa-miR-320d      | 15 | 3.09719439 | 5.34E-04   | 0.32287286 | 0.11582239 |
| hsa-miR-449b-5p   | 15 | 3.19539078 | 2.62E-04   | 0.31295077 | 0.11659389 |
| BCAS1 down        | 15 | 3.24315297 | 1.57E-04   | 0.30834192 | 0.1020979  |
| hsa-miR-628-5p    | 15 | 3.12191049 | 3.89E-04   | 0.32031668 | 0.12166018 |
| hsa-miR-326       | 15 | 3.20273881 | 5.14E-04   | 0.31223277 | 0.10121279 |
| hsa-miR-1913      | 15 | 3.30895124 | 3.64E-04   | 0.30221056 | 0.10389036 |
| hsa-miR-548z      | 15 | 3.16065464 | 3.65E-04   | 0.31639015 | 0.11582213 |
| hsa-miR-6499-3p   | 15 | 3.24348697 | 5.15E-04   | 0.30831016 | 0.10581761 |
| hsa-miR-548w      | 15 | 3.24816299 | 2.06E-04   | 0.30786632 | 0.14126984 |
| hsa-miR-589-5p    | 15 | 3.34034736 | 1.80E-04   | 0.29937006 | 0.12274232 |
| hsa-miR-372-3p    | 15 | 3.03907816 | 5.05E-04   | 0.32904715 | 0.12314815 |
| CCNB2 up          | 15 | 3.09752839 | 8.74E-05   | 0.32283804 | 0.1687011  |
| hsa-miR-1276      | 15 | 3.20674683 | 3.11E-04   | 0.31184252 | 0.11736881 |
| hsa-miR-373-3p    | 15 | 3.03640615 | 4.97E-04   | 0.32933671 | 0.12645869 |
| hsa-miR-5698      | 15 | 3.48196393 | 3.93E-04   | 0.28719424 | 0.09811566 |
| hsa-miR-577       | 15 | 3.05911824 | 7.13E-04   | 0.32689158 | 0.11791222 |
| hsa-miR-583       | 15 | 2.98764195 | 6.99E-04   | 0.33471213 | 0.11232356 |
| hsa-miR-130a-5p   | 15 | 3.0257181  | 5.82E-04   | 0.33050006 | 0.11947534 |
| hsa-miR-3180-3p   | 15 | 3.31229125 | 3.85E-04   | 0.30190582 | 0.10666667 |
| KRT7 up           | 15 | 3.1242485  | 0.00149599 | 0.32007697 | 0.10672926 |
| MGP down          | 15 | 2.99599198 | 1.73E-04   | 0.33377926 | 0.18338338 |
| NOXA1 down        | 15 | 3.13760855 | 1.13E-04   | 0.31871407 | 0.11413613 |
| SBN02 up          | 15 | 3.09418838 | 9.36E-05   | 0.32318653 | 0.13166667 |
| SCN4B down        | 15 | 3.40347361 | 8.31E-04   | 0.29381747 | 0.0994152  |
| SPINT1 down       | 15 | 3.05744823 | 5.52E-05   | 0.32707013 | 0.23776042 |
| hsa-miR-4768-3p   | 14 | 3.39245157 | 2.10E-04   | 0.29477208 | 0.11032864 |
| hsa-miR-199a-5p   | 14 | 3.33099532 | 2.39E-04   | 0.30021057 | 0.11559889 |
| hsa-miR-1976      | 14 | 3.34702739 | 3.98E-04   | 0.29877258 | 0.10186514 |
| hsa-miR-103a-2-5p | 14 | 3.17134269 | 8.37E-04   | 0.31532385 | 0.11229827 |
| hsa-miR-548a-5p   | 14 | 3.250835   | 2.33E-04   | 0.30761327 | 0.13694758 |
| hsa-miR-4326      | 14 | 3.05310621 | 5.93E-04   | 0.32753528 | 0.12943262 |
| hsa-miR-570-3p    | 14 | 3.28490314 | 2.74E-04   | 0.30442298 | 0.11678436 |
| hsa-miR-6731-5p   | 14 | 3.23947896 | 4.68E-04   | 0.30869162 | 0.10980066 |
| hsa-miR-8085      | 14 | 3.23947896 | 4.68E-04   | 0.30869162 | 0.10980066 |
| hsa-miR-3941      | 14 | 3.02037408 | 5.71E-04   | 0.33108482 | 0.11435848 |
| hsa-miR-92a-2-5p  | 14 | 3.25217101 | 3.61E-04   | 0.30748691 | 0.1135006  |

|                 |    |            |            |            |            |
|-----------------|----|------------|------------|------------|------------|
| hsa-miR-342-5p  | 14 | 3.1760187  | 6.94E-04   | 0.31485961 | 0.10699248 |
| hsa-miR-3662    | 14 | 3.0504342  | 5.00E-04   | 0.32782218 | 0.11974049 |
| hsa-miR-4668-5p | 14 | 3.06312625 | 6.21E-04   | 0.32646385 | 0.11133137 |
| hsa-miR-616-5p  | 14 | 3.31162325 | 3.06E-04   | 0.30196672 | 0.10509796 |
| hsa-miR-4649-3p | 14 | 3.27154309 | 4.22E-04   | 0.30566616 | 0.10419236 |
| hsa-miR-548an   | 14 | 3.23079492 | 4.66E-04   | 0.30952135 | 0.10809029 |
| hsa-miR-135b-5p | 14 | 3.05177021 | 4.27E-04   | 0.32767867 | 0.12682988 |
| hsa-miR-605-5p  | 14 | 3.15731463 | 5.15E-04   | 0.31672485 | 0.11693607 |
| hsa-miR-588     | 14 | 3.26553106 | 5.08E-04   | 0.3062289  | 0.10981595 |
| hsa-miR-548o-3p | 14 | 3.2762191  | 2.50E-04   | 0.30522989 | 0.11246201 |
| hsa-miR-5582-3p | 14 | 3.12124248 | 4.42E-04   | 0.32038523 | 0.12578092 |
| hsa-miR-199b-3p | 14 | 3.08650635 | 4.25E-04   | 0.32399091 | 0.12222222 |
| hsa-miR-494-3p  | 14 | 3.1259185  | 3.75E-04   | 0.31990597 | 0.11939776 |
| BOC down        | 14 | 3.28657315 | 0.00107263 | 0.30426829 | 0.09660422 |
| hsa-miR-548b-3p | 14 | 3.06646627 | 4.45E-04   | 0.32610827 | 0.1268484  |
| hsa-miR-548h-3p | 14 | 3.16666667 | 3.47E-04   | 0.31578947 | 0.12282139 |
| hsa-miR-210-3p  | 14 | 3.29826319 | 3.02E-04   | 0.30318987 | 0.12041348 |
| hsa-miR-202-3p  | 14 | 2.98363393 | 5.17E-04   | 0.33516176 | 0.12630238 |
| hsa-miR-526b-5p | 14 | 3.2247829  | 3.97E-04   | 0.31009839 | 0.11967347 |
| hsa-miR-3065-3p | 14 | 3.22211089 | 4.26E-04   | 0.31035555 | 0.10787172 |
| hsa-miR-370-3p  | 14 | 3.22211089 | 2.79E-04   | 0.31035555 | 0.11275626 |
| DCN down        | 14 | 3.16098864 | 1.03E-04   | 0.31635672 | 0.12997658 |
| SELE up         | 14 | 3.17301269 | 3.53E-04   | 0.31515789 | 0.11460856 |
| SH3BGRL2 down   | 14 | 3.09018036 | 9.30E-05   | 0.32360571 | 0.19664546 |
| SMCO4 down      | 14 | 3.07949232 | 7.47E-04   | 0.32472885 | 0.11625217 |
| ZC3H12A up      | 14 | 3.18637275 | 8.52E-04   | 0.31383648 | 0.09340659 |
| hsa-miR-548a-3p | 13 | 3.29759519 | 2.16E-04   | 0.30325129 | 0.13321314 |
| hsa-miR-548h-5p | 13 | 3.23146293 | 2.06E-04   | 0.30945736 | 0.14975071 |
| hsa-miR-4664-5p | 13 | 3.18002672 | 6.02E-04   | 0.31446277 | 0.11595745 |
| hsa-miR-212-3p  | 13 | 3.21476286 | 2.86E-04   | 0.31106494 | 0.12969687 |
| hsa-miR-3175    | 13 | 3.2247829  | 5.49E-04   | 0.31009839 | 0.11516683 |
| ADIRF down      | 13 | 3.46960588 | 9.93E-05   | 0.28821717 | 0.16132479 |
| hsa-miR-612     | 13 | 3.34368737 | 3.89E-04   | 0.29907102 | 0.1061495  |
| hsa-miR-367-3p  | 13 | 3.30561122 | 2.46E-04   | 0.30251591 | 0.12753302 |
| hsa-miR-6884-5p | 13 | 3.249499   | 3.57E-04   | 0.30773975 | 0.11570248 |
| hsa-miR-3653-5p | 13 | 3.32631931 | 5.81E-04   | 0.30063259 | 0.11053126 |
| hsa-miR-6749-3p | 13 | 3.14061456 | 6.33E-04   | 0.31840902 | 0.11442976 |
| hsa-miR-922     | 13 | 3.29225117 | 2.93E-04   | 0.30374353 | 0.11355782 |
| hsa-miR-499a-3p | 13 | 3.16533066 | 2.96E-04   | 0.31592276 | 0.11753464 |
| hsa-miR-216b-5p | 13 | 3.33700735 | 1.96E-04   | 0.2996697  | 0.11877353 |
| ARHGAP30 down   | 13 | 3.10354041 | 1.71E-04   | 0.32221266 | 0.16929255 |
| hsa-miR-502-3p  | 13 | 3.17000668 | 3.76E-04   | 0.31545675 | 0.11682392 |
| hsa-miR-3615    | 13 | 3.34635939 | 3.00E-04   | 0.29883222 | 0.11715296 |
| hsa-miR-34b-5p  | 13 | 3.0998664  | 3.86E-04   | 0.32259455 | 0.12902526 |
| hsa-miR-24-2-5p | 13 | 3.0991984  | 3.48E-04   | 0.32266408 | 0.13416311 |
| hsa-miR-876-5p  | 13 | 3.15731463 | 4.49E-04   | 0.31672485 | 0.110971   |
| hsa-miR-548aa   | 13 | 3.11589846 | 3.96E-04   | 0.32093472 | 0.1226912  |

|                   |    |            |            |            |            |
|-------------------|----|------------|------------|------------|------------|
| hsa-miR-548ap-3p  | 13 | 3.15130261 | 3.52E-04   | 0.31732909 | 0.1193634  |
| hsa-miR-6890-3p   | 13 | 3.37775551 | 4.43E-04   | 0.29605458 | 0.11316343 |
| hsa-miR-16-1-3p   | 13 | 2.99031396 | 4.82E-04   | 0.33441305 | 0.133782   |
| hsa-miR-148b-5p   | 13 | 3.22277889 | 4.03E-04   | 0.31029122 | 0.12111665 |
| hsa-miR-548aj-5p  | 13 | 3.20541082 | 3.15E-04   | 0.31197249 | 0.13512146 |
| hsa-miR-548x-5p   | 13 | 3.20541082 | 3.15E-04   | 0.31197249 | 0.13512146 |
| hsa-miR-548g-5p   | 13 | 3.20541082 | 3.15E-04   | 0.31197249 | 0.13512146 |
| hsa-miR-650       | 13 | 3.3744155  | 2.08E-04   | 0.29634762 | 0.11661773 |
| hsa-miR-548y      | 13 | 3.0998664  | 3.33E-04   | 0.32259455 | 0.15927857 |
| hsa-miR-548i      | 13 | 3.0998664  | 3.33E-04   | 0.32259455 | 0.15927857 |
| hsa-miR-548ak     | 13 | 3.28623914 | 1.47E-04   | 0.30429922 | 0.15531043 |
| hsa-miR-520b      | 13 | 3.07982632 | 4.03E-04   | 0.32469363 | 0.13658777 |
| hsa-miR-194-5p    | 13 | 3.1993988  | 2.81E-04   | 0.31255872 | 0.12847966 |
| hsa-miR-188-5p    | 13 | 3.30828323 | 4.44E-04   | 0.30227158 | 0.11212861 |
| hsa-miR-222-5p    | 13 | 3.18737475 | 2.72E-04   | 0.31373782 | 0.12929624 |
| hsa-miR-1915-3p   | 13 | 3.34836339 | 3.95E-04   | 0.29865337 | 0.1062373  |
| hsa-miR-1252-5p   | 13 | 3.31897128 | 4.83E-04   | 0.30129818 | 0.10701898 |
| hsa-miR-493-5p    | 13 | 3.15798263 | 3.63E-04   | 0.31665785 | 0.12891519 |
| hsa-miR-520c-3p   | 13 | 3.1740147  | 3.05E-04   | 0.3150584  | 0.13705707 |
| hsa-miR-1207-5p   | 13 | 3.3744155  | 3.01E-04   | 0.29634762 | 0.10622155 |
| GPD1 down         | 13 | 3.25517702 | 1.99E-04   | 0.30720296 | 0.10316041 |
| hsa-miR-520h      | 13 | 3.14395458 | 3.40E-04   | 0.31807075 | 0.13974102 |
| KIF4A up          | 13 | 2.98663995 | 1.15E-04   | 0.33482442 | 0.16809955 |
| LGALS3 down       | 13 | 3.06479626 | 7.51E-04   | 0.32628596 | 0.14526737 |
| LHFP down         | 13 | 3.14629259 | 2.76E-05   | 0.31783439 | 0.27283654 |
| MUC1 up           | 13 | 2.9739479  | 1.84E-04   | 0.33625337 | 0.15151515 |
| NINL down         | 13 | 3.21309285 | 1.13E-04   | 0.31122661 | 0.11289705 |
| RFX2 down         | 13 | 3.0501002  | 0.00283085 | 0.32785808 | 0.10882429 |
| RUVBL1 up         | 13 | 3.04208417 | 9.06E-05   | 0.328722   | 0.16239316 |
| TEAD4 up          | 13 | 3.12358049 | 1.45E-04   | 0.32014542 | 0.17401046 |
| YPEL3 down        | 13 | 2.98864395 | 1.56E-04   | 0.33459991 | 0.15362447 |
| hsa-miR-422a      | 12 | 3.26152305 | 2.14E-04   | 0.30660522 | 0.1320202  |
| hsa-miR-136-5p    | 12 | 3.35704743 | 2.48E-04   | 0.29788081 | 0.11373547 |
| hsa-miR-4433a-3p  | 12 | 3.27354709 | 2.38E-04   | 0.30547903 | 0.1204955  |
| hsa-miR-589-3p    | 12 | 3.35704743 | 1.70E-04   | 0.29788081 | 0.12157287 |
| hsa-miR-539-5p    | 12 | 3.25951904 | 8.65E-04   | 0.30679373 | 0.1200361  |
| hsa-miR-3157-3p   | 12 | 3.38443554 | 1.73E-04   | 0.29547025 | 0.12964417 |
| hsa-miR-493-3p    | 12 | 3.3496994  | 2.12E-04   | 0.29853425 | 0.11536609 |
| hsa-miR-664a-5p   | 12 | 3.27154309 | 8.18E-04   | 0.30566616 | 0.12396865 |
| hsa-miR-6763-5p   | 12 | 3.44121576 | 2.57E-04   | 0.29059497 | 0.1163164  |
| hsa-miR-3150a-3p  | 12 | 3.44121576 | 2.57E-04   | 0.29059497 | 0.1163164  |
| hsa-miR-1343-5p   | 12 | 3.39779559 | 2.71E-04   | 0.29430846 | 0.12000526 |
| hsa-miR-6779-5p   | 12 | 3.39512358 | 2.14E-04   | 0.29454009 | 0.13817123 |
| hsa-miR-6780a-5p  | 12 | 3.39311957 | 2.07E-04   | 0.29471405 | 0.13671875 |
| hsa-miR-3689a-3p  | 12 | 3.30694723 | 2.81E-04   | 0.3023937  | 0.1362054  |
| hsa-miR-1273f     | 12 | 3.09786239 | 4.27E-04   | 0.32280323 | 0.13721805 |
| hsa-miR-450a-1-3p | 12 | 3.21008684 | 3.32E-04   | 0.31151805 | 0.1315595  |



|                   |    |            |          |            |            |
|-------------------|----|------------|----------|------------|------------|
| hsa-miR-1252-3p   | 12 | 3.11189045 | 4.38E-04 | 0.32134807 | 0.13363578 |
| hsa-miR-1179      | 12 | 3.11923848 | 3.97E-04 | 0.32059107 | 0.13789778 |
| ADAP2 up          | 12 | 3.23112892 | 3.54E-04 | 0.30948935 | 0.10973085 |
| hsa-miR-516b-5p   | 12 | 3.23279893 | 3.07E-04 | 0.30932948 | 0.12307544 |
| hsa-miR-550a-3-5p | 12 | 3.20808283 | 3.63E-04 | 0.31171265 | 0.1409545  |
| hsa-miR-6086      | 12 | 3.28557114 | 2.73E-04 | 0.30436109 | 0.12315634 |
| hsa-miR-548ax     | 12 | 3.21075484 | 3.03E-04 | 0.31145324 | 0.13446548 |
| hsa-miR-429       | 12 | 3.23547094 | 3.30E-04 | 0.30907402 | 0.12952271 |
| hsa-miR-489-3p    | 12 | 3.43186373 | 2.45E-04 | 0.29138686 | 0.10840456 |
| hsa-miR-4476      | 12 | 3.15731463 | 3.92E-04 | 0.31672485 | 0.12495753 |
| hsa-miR-6876-5p   | 12 | 3.15731463 | 3.92E-04 | 0.31672485 | 0.12495753 |
| hsa-miR-939-3p    | 12 | 3.24482298 | 7.12E-04 | 0.30818322 | 0.110363   |
| hsa-miR-2467-3p   | 12 | 3.3490314  | 2.76E-04 | 0.2985938  | 0.12026515 |
| hsa-miR-548ah-5p  | 12 | 3.17869071 | 2.55E-04 | 0.31459494 | 0.13627555 |
| hsa-miR-519a-3p   | 12 | 3.43453574 | 1.90E-04 | 0.29116017 | 0.12096309 |
| hsa-miR-432-5p    | 12 | 3.29091516 | 1.97E-04 | 0.30386684 | 0.11885072 |
| hsa-miR-629-5p    | 12 | 3.33299933 | 1.63E-04 | 0.30003006 | 0.12862069 |
| hsa-miR-1254      | 12 | 3.13393454 | 4.22E-04 | 0.31908771 | 0.14352767 |
| hsa-miR-26b-3p    | 12 | 3.19205077 | 2.69E-04 | 0.31327823 | 0.14050179 |
| hsa-miR-6821-3p   | 12 | 3.38510354 | 3.90E-04 | 0.29541194 | 0.10903308 |
| hsa-miR-6790-3p   | 12 | 3.38510354 | 3.90E-04 | 0.29541194 | 0.10903308 |
| hsa-miR-647       | 12 | 3.21075484 | 3.17E-04 | 0.31145324 | 0.12675536 |
| hsa-miR-4422      | 12 | 3.44455578 | 1.04E-04 | 0.2903132  | 0.13029219 |
| hsa-miR-4429      | 12 | 3.28022712 | 2.66E-04 | 0.30485694 | 0.13644918 |
| hsa-miR-383-5p    | 12 | 3.24348697 | 2.92E-04 | 0.30831016 | 0.12833333 |
| hsa-miR-3163      | 12 | 3.23079492 | 3.46E-04 | 0.30952135 | 0.11748478 |
| hsa-miR-4533      | 12 | 3.2241149  | 3.96E-04 | 0.31016264 | 0.12320076 |
| hsa-miR-548ar-3p  | 12 | 3.15531062 | 3.39E-04 | 0.31692601 | 0.14087504 |
| hsa-miR-497-3p    | 12 | 3.250167   | 4.34E-04 | 0.3076765  | 0.12114014 |
| hsa-miR-4793-3p   | 12 | 3.35571142 | 1.63E-04 | 0.2979994  | 0.11229228 |
| hsa-miR-548f-5p   | 12 | 3.34301937 | 1.88E-04 | 0.29913078 | 0.14513109 |
| hsa-miR-192-3p    | 12 | 3.1740147  | 4.44E-04 | 0.3150584  | 0.12439109 |
| hsa-miR-28-5p     | 12 | 3.24348697 | 8.67E-04 | 0.30831016 | 0.13315645 |
| hsa-miR-10a-3p    | 12 | 3.03573814 | 4.60E-04 | 0.32940918 | 0.13932067 |
| hsa-miR-4698      | 12 | 3.11189045 | 3.93E-04 | 0.32134807 | 0.13102073 |
| CHPT1 down        | 12 | 3.05744823 | 5.65E-05 | 0.32707013 | 0.22030303 |
| hsa-miR-498       | 12 | 3.18670675 | 4.23E-04 | 0.31380358 | 0.13283476 |
| hsa-miR-3150b-3p  | 12 | 3.35370741 | 2.50E-04 | 0.29817747 | 0.11427909 |
| CTSL up           | 12 | 3.10487642 | 3.87E-05 | 0.32207401 | 0.19642857 |
| hsa-miR-657       | 12 | 3.4498998  | 2.16E-04 | 0.28986349 | 0.11633212 |
| hsa-miR-502-5p    | 12 | 3.28423514 | 2.39E-04 | 0.3044849  | 0.11946903 |
| hsa-miR-550a-3p   | 12 | 3.21142285 | 5.17E-04 | 0.31138846 | 0.14174107 |
| hsa-miR-302e      | 12 | 3.20273881 | 2.67E-04 | 0.31223277 | 0.14150255 |
| hsa-miR-520e      | 12 | 3.20273881 | 2.67E-04 | 0.31223277 | 0.14150255 |
| hsa-miR-520d-3p   | 12 | 3.20273881 | 2.67E-04 | 0.31223277 | 0.14150255 |
| hsa-miR-4419b     | 12 | 3.39111556 | 2.46E-04 | 0.29488821 | 0.11625194 |
| hsa-miR-4478      | 12 | 3.39111556 | 2.46E-04 | 0.29488821 | 0.11625194 |

|                   |      |    |            |          |            |            |
|-------------------|------|----|------------|----------|------------|------------|
| LYAR              | up   | 12 | 3.0995324  | 5.22E-05 | 0.32262931 | 0.22534722 |
| NDC80             | up   | 12 | 3.23580494 | 7.03E-04 | 0.30904211 | 0.23154362 |
| PLIN1             | down | 12 | 3.39812959 | 7.68E-05 | 0.29427954 | 0.11316872 |
| VIPR1             | down | 12 | 3.39478958 | 1.05E-04 | 0.29456907 | 0.13995726 |
| hsa-miR-199b-5p   |      | 11 | 3.41382766 | 1.54E-04 | 0.29292633 | 0.13210702 |
| hsa-miR-10b-5p    |      | 11 | 3.3750835  | 1.98E-04 | 0.29628897 | 0.12691676 |
| hsa-miR-5193      |      | 11 | 3.34635939 | 3.56E-04 | 0.29883222 | 0.12462716 |
| hsa-miR-3184-5p   |      | 11 | 3.21943888 | 3.55E-04 | 0.31061313 | 0.1382512  |
| hsa-miR-3689b-3p  |      | 11 | 3.41649967 | 1.81E-04 | 0.29269723 | 0.14747475 |
| hsa-miR-3689c     |      | 11 | 3.41649967 | 1.81E-04 | 0.29269723 | 0.14747475 |
| hsa-miR-6888-5p   |      | 11 | 3.20140281 | 3.27E-04 | 0.31236307 | 0.13001083 |
| hsa-miR-219a-1-3p |      | 11 | 3.17201069 | 6.63E-04 | 0.31525745 | 0.12685432 |
| hsa-miR-1273h-5p  |      | 11 | 3.41649967 | 1.81E-04 | 0.29269723 | 0.14747475 |
| hsa-miR-5096      |      | 11 | 3.36773547 | 3.19E-04 | 0.29693544 | 0.12418831 |
| hsa-miR-6788-5p   |      | 11 | 3.25617902 | 2.91E-04 | 0.30710842 | 0.14081146 |
| hsa-miR-381-3p    |      | 11 | 3.12992652 | 3.49E-04 | 0.31949632 | 0.14356876 |
| hsa-miR-6799-5p   |      | 11 | 3.42852371 | 1.82E-04 | 0.29167073 | 0.14604305 |
| hsa-miR-2277-3p   |      | 11 | 3.21342685 | 2.45E-04 | 0.31119426 | 0.14153815 |
| hsa-miR-608       |      | 11 | 3.17935872 | 3.65E-04 | 0.31452884 | 0.13521289 |
| hsa-miR-550a-5p   |      | 11 | 3.21142285 | 3.37E-04 | 0.31138846 | 0.15232593 |
| hsa-miR-548c-3p   |      | 11 | 3.42919172 | 2.41E-04 | 0.29161391 | 0.12126221 |
| hsa-miR-6849-3p   |      | 11 | 3.46526386 | 2.17E-04 | 0.28857831 | 0.12098428 |
| hsa-miR-7160-5p   |      | 11 | 3.51937208 | 1.64E-04 | 0.2841416  | 0.13480297 |
| hsa-miR-3928-3p   |      | 11 | 3.23213093 | 2.81E-04 | 0.30939341 | 0.13892667 |
| AIF1L             | down | 11 | 3.01336005 | 9.02E-05 | 0.33185546 | 0.17805443 |
| hsa-miR-328-3p    |      | 11 | 3.35637943 | 2.37E-04 | 0.29794009 | 0.13097298 |
| hsa-miR-5006-3p   |      | 11 | 3.09452238 | 4.22E-04 | 0.32315165 | 0.14569199 |
| hsa-miR-105-5p    |      | 11 | 3.3009352  | 1.62E-04 | 0.30294445 | 0.13294866 |
| hsa-miR-135a-5p   |      | 11 | 3.05177021 | 3.67E-04 | 0.32767867 | 0.15532971 |
| hsa-miR-4779      |      | 11 | 3.29692719 | 3.05E-04 | 0.30331273 | 0.13969814 |
| hsa-miR-6783-3p   |      | 11 | 3.13727455 | 3.98E-04 | 0.318748   | 0.13057525 |
| hsa-miR-615-5p    |      | 11 | 3.39445558 | 3.50E-04 | 0.29459805 | 0.12670007 |
| hsa-miR-410-3p    |      | 11 | 3.21275885 | 2.80E-04 | 0.31125897 | 0.13626263 |
| hsa-miR-193b-5p   |      | 11 | 3.24348697 | 3.07E-04 | 0.30831016 | 0.13323433 |
| hsa-miR-552-3p    |      | 11 | 3.20541082 | 3.18E-04 | 0.31197249 | 0.13213183 |
| hsa-miR-424-3p    |      | 11 | 3.45791583 | 1.64E-04 | 0.28919154 | 0.14783191 |
| hsa-miR-3127-3p   |      | 11 | 3.24415498 | 2.34E-04 | 0.30824668 | 0.14189908 |
| hsa-miR-595       |      | 11 | 3.29759519 | 2.02E-04 | 0.30325129 | 0.13824776 |
| hsa-miR-28-3p     |      | 11 | 3.17802271 | 4.47E-04 | 0.31466106 | 0.13855078 |
| hsa-miR-212-5p    |      | 11 | 3.11656647 | 4.29E-04 | 0.32086593 | 0.14178322 |
| hsa-miR-27b-5p    |      | 11 | 3.16265865 | 3.76E-04 | 0.31618967 | 0.13458294 |
| hsa-miR-4295      |      | 11 | 3.15798263 | 2.85E-04 | 0.31665785 | 0.15309054 |
| hsa-miR-3666      |      | 11 | 3.15798263 | 2.85E-04 | 0.31665785 | 0.15309054 |
| hsa-miR-876-3p    |      | 11 | 3.26219105 | 1.89E-04 | 0.30654244 | 0.14359881 |
| hsa-miR-3176      |      | 11 | 3.30828323 | 2.57E-04 | 0.30227158 | 0.13413606 |
| hsa-miR-501-5p    |      | 11 | 3.33567134 | 1.94E-04 | 0.29978973 | 0.14385475 |
| hsa-miR-1293      |      | 11 | 3.23747495 | 2.79E-04 | 0.3088827  | 0.13308668 |

|                  |    |            |          |            |            |
|------------------|----|------------|----------|------------|------------|
| hsa-miR-511-5p   | 11 | 3.27154309 | 2.16E-04 | 0.30566616 | 0.13287579 |
| hsa-miR-1226-5p  | 11 | 3.27755511 | 2.61E-04 | 0.30510547 | 0.1347302  |
| hsa-miR-616-3p   | 11 | 3.23012692 | 6.49E-04 | 0.30958536 | 0.14470392 |
| hsa-miR-548t-3p  | 11 | 3.16800267 | 3.03E-04 | 0.3156563  | 0.13674085 |
| hsa-let-7f-2-3p  | 11 | 3.36305945 | 1.08E-04 | 0.2973483  | 0.15493719 |
| hsa-miR-6867-5p  | 11 | 3.23680695 | 3.26E-04 | 0.30894645 | 0.12659698 |
| hsa-miR-708-5p   | 11 | 3.30227121 | 2.03E-04 | 0.30282189 | 0.12834928 |
| hsa-miR-3943     | 11 | 3.47194389 | 2.33E-04 | 0.28802309 | 0.11949036 |
| hsa-miR-483-3p   | 11 | 3.14595858 | 4.09E-04 | 0.31786814 | 0.1360445  |
| hsa-miR-551b-5p  | 11 | 3.08183033 | 4.37E-04 | 0.3244825  | 0.13590702 |
| hsa-miR-5690     | 11 | 3.42985972 | 3.64E-04 | 0.29155711 | 0.11273975 |
| hsa-miR-4786-3p  | 11 | 3.16199065 | 3.47E-04 | 0.31625647 | 0.12973679 |
| hsa-miR-4286     | 11 | 3.16332665 | 2.65E-04 | 0.3161229  | 0.14029181 |
| hsa-miR-532-5p   | 11 | 3.21676687 | 2.69E-04 | 0.31087115 | 0.13973442 |
| hsa-miR-6511a-5p | 11 | 3.19004676 | 3.00E-04 | 0.31347503 | 0.13416659 |
| hsa-miR-1910-3p  | 11 | 3.19004676 | 3.00E-04 | 0.31347503 | 0.13416659 |
| hsa-miR-4517     | 11 | 3.38911156 | 1.28E-04 | 0.29506258 | 0.13834608 |
| hsa-miR-548au-5p | 11 | 3.24549098 | 1.82E-04 | 0.30811979 | 0.16848058 |
| hsa-miR-9500     | 11 | 3.18470274 | 3.11E-04 | 0.31400105 | 0.13080862 |
| hsa-miR-593-5p   | 11 | 3.21743487 | 2.51E-04 | 0.3108066  | 0.13263115 |
| hsa-miR-590-5p   | 11 | 3.13861055 | 2.21E-04 | 0.31861232 | 0.15805169 |
| CD207 down       | 11 | 3.63794255 | 7.27E-04 | 0.27488065 | 0.1426025  |
| hsa-miR-296-3p   | 11 | 3.60688043 | 9.40E-05 | 0.27724789 | 0.11015059 |
| hsa-miR-345-5p   | 11 | 3.35237141 | 5.06E-04 | 0.2982963  | 0.12598529 |
| hsa-miR-299-5p   | 11 | 3.27755511 | 1.98E-04 | 0.30510547 | 0.14022727 |
| hsa-miR-4784     | 11 | 3.35971944 | 2.20E-04 | 0.2976439  | 0.12364148 |
| CX3CL1 down      | 11 | 3.249165   | 8.97E-04 | 0.30777138 | 0.11616162 |
| hsa-miR-139-5p   | 11 | 3.26753507 | 2.24E-04 | 0.30604109 | 0.14258724 |
| hsa-miR-23c      | 11 | 3.13393454 | 2.90E-04 | 0.31908771 | 0.14633489 |
| LAYN down        | 11 | 3.3987976  | 9.63E-05 | 0.2942217  | 0.12121212 |
| MATN2 down       | 11 | 3.2237809  | 2.70E-05 | 0.31019478 | 0.36363636 |
| NSG1 down        | 11 | 3.47695391 | 2.42E-04 | 0.28760807 | 0.11610077 |
| hsa-miR-4635     | 11 | 3.33032732 | 2.75E-04 | 0.30027079 | 0.13822653 |
| PIF1 up          | 11 | 3.1750167  | 4.51E-05 | 0.31495897 | 0.22444541 |
| PYGL up          | 11 | 3.11690047 | 4.24E-05 | 0.32083155 | 0.20286195 |
| VSIG10 down      | 11 | 3.2004008  | 6.71E-05 | 0.31246086 | 0.13242249 |
| hsa-miR-376a-3p  | 10 | 3.26553106 | 2.62E-04 | 0.3062289  | 0.13672986 |
| hsa-miR-363-5p   | 10 | 3.34769539 | 2.11E-04 | 0.29871296 | 0.13861386 |
| hsa-miR-520a-5p  | 10 | 3.36439546 | 2.28E-04 | 0.29723022 | 0.13589365 |
| hsa-miR-587      | 10 | 3.46192385 | 1.11E-04 | 0.28885673 | 0.13939962 |
| hsa-miR-642a-5p  | 10 | 3.43921176 | 8.55E-04 | 0.2907643  | 0.12587065 |
| hsa-miR-582-3p   | 10 | 3.34168337 | 2.75E-04 | 0.29925037 | 0.15923295 |
| hsa-miR-4487     | 10 | 3.13460254 | 3.29E-04 | 0.31901971 | 0.15098814 |
| hsa-miR-1271-5p  | 10 | 3.21142285 | 2.30E-04 | 0.31138846 | 0.14827202 |
| hsa-miR-365b-3p  | 10 | 3.48129593 | 1.95E-04 | 0.28724935 | 0.1273622  |
| hsa-miR-3646     | 10 | 3.18336673 | 2.36E-04 | 0.31413283 | 0.16174283 |
| hsa-miR-6878-5p  | 10 | 3.26553106 | 2.97E-04 | 0.3062289  | 0.14183797 |

|                  |    |            |          |            |            |
|------------------|----|------------|----------|------------|------------|
| hsa-miR-567      | 10 | 3.39111556 | 1.56E-04 | 0.29488821 | 0.14179811 |
| hsa-miR-223-5p   | 10 | 3.2995992  | 2.34E-04 | 0.30306711 | 0.1449935  |
| hsa-miR-34b-3p   | 10 | 3.26018704 | 2.19E-04 | 0.30673087 | 0.14129652 |
| hsa-miR-5194     | 10 | 3.14662659 | 3.92E-04 | 0.31780066 | 0.15155155 |
| hsa-miR-6738-5p  | 10 | 3.14662659 | 3.92E-04 | 0.31780066 | 0.15155155 |
| hsa-miR-382-5p   | 10 | 3.25818303 | 2.25E-04 | 0.30691953 | 0.14621849 |
| hsa-miR-379-5p   | 10 | 3.36973948 | 1.35E-04 | 0.29675885 | 0.14092954 |
| hsa-miR-6893-5p  | 10 | 3.49599198 | 1.59E-04 | 0.28604185 | 0.1428     |
| hsa-miR-624-3p   | 10 | 3.44789579 | 1.63E-04 | 0.29003197 | 0.12651246 |
| hsa-miR-6808-5p  | 10 | 3.49599198 | 1.59E-04 | 0.28604185 | 0.1428     |
| hsa-miR-1294     | 10 | 3.19138277 | 2.65E-04 | 0.3133438  | 0.14571734 |
| hsa-miR-3611     | 10 | 3.33032732 | 2.43E-04 | 0.30027079 | 0.13672627 |
| hsa-miR-6894-5p  | 10 | 3.33901136 | 1.85E-04 | 0.29948985 | 0.14551821 |
| hsa-miR-6840-3p  | 10 | 3.34368737 | 2.62E-04 | 0.29907102 | 0.13534362 |
| ALOX5 down       | 10 | 3.17034068 | 1.37E-05 | 0.31542351 | 0.33274854 |
| hsa-miR-132-5p   | 10 | 3.33767535 | 1.83E-04 | 0.29960973 | 0.14128312 |
| hsa-miR-4437     | 10 | 3.34435538 | 2.32E-04 | 0.29901129 | 0.12949438 |
| hsa-miR-623      | 10 | 3.1740147  | 3.18E-04 | 0.3150584  | 0.14546403 |
| hsa-miR-622      | 10 | 3.36706747 | 1.48E-04 | 0.29699435 | 0.13136966 |
| hsa-miR-519b-3p  | 10 | 3.48530394 | 1.41E-04 | 0.28691902 | 0.13796477 |
| hsa-miR-519c-3p  | 10 | 3.46459586 | 1.44E-04 | 0.28863395 | 0.14283054 |
| hsa-miR-485-3p   | 10 | 3.36573146 | 1.66E-04 | 0.29711224 | 0.15117994 |
| hsa-miR-557      | 10 | 3.51269205 | 9.62E-05 | 0.28468194 | 0.14449244 |
| hsa-miR-3652     | 10 | 3.30427522 | 2.25E-04 | 0.30263823 | 0.13233377 |
| hsa-miR-4430     | 10 | 3.30427522 | 2.25E-04 | 0.30263823 | 0.13233377 |
| ARG2 down        | 10 | 3.08817635 | 6.05E-05 | 0.3238157  | 0.26352941 |
| hsa-miR-4738-3p  | 10 | 3.28757515 | 2.73E-04 | 0.30417556 | 0.14796954 |
| hsa-miR-3679-5p  | 10 | 3.28891116 | 1.83E-04 | 0.304052   | 0.14157161 |
| hsa-miR-545-5p   | 10 | 3.27688711 | 1.99E-04 | 0.30516767 | 0.15043478 |
| hsa-miR-449c-5p  | 10 | 3.29559118 | 1.68E-04 | 0.30343569 | 0.14451613 |
| hsa-miR-760      | 10 | 3.31295925 | 2.35E-04 | 0.30184494 | 0.14045394 |
| hsa-miR-3148     | 10 | 3.11189045 | 3.49E-04 | 0.32134807 | 0.14416826 |
| hsa-miR-597-5p   | 10 | 3.46526386 | 8.74E-05 | 0.28857831 | 0.13610586 |
| hsa-miR-4797-5p  | 10 | 3.25818303 | 3.56E-04 | 0.30691953 | 0.13971119 |
| BPGM down        | 10 | 3.14562458 | 5.51E-05 | 0.31790189 | 0.16564103 |
| hsa-miR-1271-3p  | 10 | 3.23680695 | 2.98E-04 | 0.30894645 | 0.16067285 |
| hsa-miR-6807-5p  | 10 | 3.33901136 | 3.24E-04 | 0.29948985 | 0.13190014 |
| hsa-miR-31-3p    | 10 | 3.2007348  | 2.10E-04 | 0.31242826 | 0.15196507 |
| hsa-miR-452-3p   | 10 | 3.36706747 | 1.19E-04 | 0.29699435 | 0.14160475 |
| hsa-miR-548aw    | 10 | 3.38443554 | 1.23E-04 | 0.29547025 | 0.16987768 |
| hsa-miR-548b-5p  | 10 | 3.26352705 | 1.62E-04 | 0.30641695 | 0.18226002 |
| hsa-miR-7-2-3p   | 10 | 3.17869071 | 1.95E-04 | 0.31459494 | 0.16596417 |
| hsa-miR-651-3p   | 10 | 3.12725451 | 4.25E-04 | 0.3197693  | 0.14619141 |
| hsa-miR-4524b-3p | 10 | 3.36439546 | 1.69E-04 | 0.29723022 | 0.13567251 |
| hsa-miR-331-5p   | 10 | 3.30227121 | 1.54E-04 | 0.30282189 | 0.14597403 |
| CSRP3 up         | 10 | 3.79826319 | 7.55E-04 | 0.26327823 | 0.13823529 |
| hsa-miR-6504-3p  | 10 | 3.20273881 | 3.76E-04 | 0.31223277 | 0.14067612 |

|                  |    |            |          |            |            |
|------------------|----|------------|----------|------------|------------|
| hsa-miR-6858-3p  | 10 | 3.53006012 | 1.79E-04 | 0.28328129 | 0.13106576 |
| hsa-miR-4722-5p  | 10 | 3.49064796 | 1.39E-04 | 0.28647976 | 0.14103586 |
| hsa-miR-1908-5p  | 10 | 3.39645959 | 3.40E-04 | 0.29442423 | 0.13161189 |
| GABARAPL2down    | 10 | 3.23313293 | 2.72E-04 | 0.30929752 | 0.15302013 |
| hsa-miR-520g-3p  | 10 | 3.22745491 | 2.25E-04 | 0.30984166 | 0.16473265 |
| HPGD down        | 10 | 3.33734135 | 4.77E-05 | 0.29963971 | 0.14017094 |
| MPZ down         | 10 | 3.78356713 | 1.10E-04 | 0.26430085 | 0.18717949 |
| PADI3 down       | 10 | 3.78089512 | 1.55E-04 | 0.26448763 | 0.14117647 |
| TMPRSS11Fdown    | 10 | 3.76553106 | 5.26E-05 | 0.26556679 | 0.16136364 |
| hsa-miR-101-5p   | 9  | 3.22344689 | 2.08E-04 | 0.31022692 | 0.16245124 |
| hsa-miR-6858-5p  | 9  | 3.34301937 | 1.70E-04 | 0.29913078 | 0.1418273  |
| hsa-miR-2114-5p  | 9  | 3.42919172 | 8.82E-05 | 0.29161391 | 0.16879985 |
| hsa-miR-3157-5p  | 9  | 3.20140281 | 2.24E-04 | 0.31236307 | 0.16794451 |
| hsa-miR-548at-5p | 9  | 3.44121576 | 6.97E-05 | 0.29059497 | 0.17266187 |
| hsa-miR-217      | 9  | 3.5487642  | 6.74E-05 | 0.28178824 | 0.14797009 |
| hsa-miR-637      | 9  | 3.45257181 | 1.33E-04 | 0.28963916 | 0.15430983 |
| hsa-miR-4775     | 9  | 3.38243153 | 1.32E-04 | 0.2956453  | 0.1503367  |
| hsa-miR-3913-5p  | 9  | 3.36573146 | 1.64E-04 | 0.29711224 | 0.15863651 |
| hsa-miR-887-5p   | 9  | 3.38309953 | 1.53E-04 | 0.29558693 | 0.16479209 |
| hsa-miR-511-3p   | 9  | 3.38844355 | 1.98E-04 | 0.29512075 | 0.14444444 |
| hsa-miR-214-5p   | 9  | 3.29425518 | 2.77E-04 | 0.30355875 | 0.16041667 |
| hsa-miR-3689d    | 9  | 3.34235137 | 3.18E-04 | 0.29919057 | 0.14845808 |
| hsa-miR-541-3p   | 9  | 3.46526386 | 8.18E-05 | 0.28857831 | 0.16656204 |
| hsa-miR-3120-3p  | 9  | 3.23747495 | 2.07E-04 | 0.3088827  | 0.15867536 |
| hsa-miR-340-3p   | 9  | 3.50668003 | 1.66E-04 | 0.28517002 | 0.13947492 |
| hsa-miR-452-5p   | 9  | 3.4251837  | 9.55E-05 | 0.29195514 | 0.17479214 |
| hsa-miR-3605-5p  | 9  | 3.23547094 | 2.51E-04 | 0.30907402 | 0.15922108 |
| hsa-miR-6847-5p  | 9  | 3.30494322 | 2.12E-04 | 0.30257706 | 0.16189236 |
| hsa-miR-6879-5p  | 9  | 3.16199065 | 3.00E-04 | 0.31625647 | 0.1550572  |
| hsa-miR-4632-5p  | 9  | 3.16199065 | 3.00E-04 | 0.31625647 | 0.1550572  |
| hsa-miR-6735-5p  | 9  | 3.16199065 | 3.00E-04 | 0.31625647 | 0.1550572  |
| hsa-miR-4436b-3p | 9  | 3.16199065 | 3.00E-04 | 0.31625647 | 0.1550572  |
| hsa-miR-7843-5p  | 9  | 3.16199065 | 3.00E-04 | 0.31625647 | 0.1550572  |
| hsa-miR-3065-5p  | 9  | 3.39111556 | 1.20E-04 | 0.29488821 | 0.1538329  |
| hsa-miR-504-3p   | 9  | 3.38844355 | 1.94E-04 | 0.29512075 | 0.13761468 |
| hsa-miR-1299     | 9  | 3.31229125 | 1.25E-04 | 0.30190582 | 0.15925926 |
| hsa-miR-151a-3p  | 9  | 3.21008684 | 2.23E-04 | 0.31151805 | 0.16492115 |
| hsa-miR-6758-5p  | 9  | 3.51336005 | 1.02E-04 | 0.28462782 | 0.1499885  |
| hsa-miR-6856-5p  | 9  | 3.51336005 | 1.02E-04 | 0.28462782 | 0.1499885  |
| hsa-miR-3124-3p  | 9  | 3.40581162 | 3.00E-04 | 0.29361577 | 0.14306229 |
| hsa-miR-2278     | 9  | 3.40714763 | 2.36E-04 | 0.29350064 | 0.15624434 |
| BARX1 down       | 9  | 3.43152973 | 1.22E-04 | 0.29141522 | 0.13836478 |
| hsa-miR-761      | 9  | 3.56346025 | 1.05E-04 | 0.28062611 | 0.13666667 |
| hsa-miR-1296-5p  | 9  | 3.44388778 | 8.76E-05 | 0.29036951 | 0.14971585 |
| hsa-miR-936      | 9  | 3.21476286 | 2.15E-04 | 0.31106494 | 0.16438018 |
| hsa-miR-1292-5p  | 9  | 3.4011356  | 1.52E-04 | 0.29401944 | 0.14056437 |
| hsa-miR-548au-3p | 9  | 3.31563126 | 1.55E-04 | 0.30160169 | 0.15968509 |

|                  |   |            |          |            |            |
|------------------|---|------------|----------|------------|------------|
| hsa-miR-100-3p   | 9 | 3.48597194 | 7.07E-05 | 0.28686404 | 0.15718695 |
| hsa-miR-885-5p   | 9 | 3.41917168 | 1.16E-04 | 0.2924685  | 0.14644056 |
| hsa-miR-145-3p   | 9 | 3.16132265 | 3.66E-04 | 0.3163233  | 0.16320508 |
| hsa-miR-5682     | 9 | 3.46659987 | 1.34E-04 | 0.2884671  | 0.16436926 |
| hsa-miR-99b-3p   | 9 | 3.38911156 | 2.65E-04 | 0.29506258 | 0.15019628 |
| hsa-miR-3200-3p  | 9 | 3.40313961 | 7.95E-04 | 0.2938463  | 0.14638448 |
| hsa-miR-181a-3p  | 9 | 3.41115564 | 1.07E-04 | 0.29315578 | 0.15878195 |
| hsa-miR-6756-5p  | 9 | 3.31563126 | 2.35E-04 | 0.30160169 | 0.15312546 |
| hsa-miR-6516-5p  | 9 | 3.22144289 | 2.30E-04 | 0.31041991 | 0.17217217 |
| CCDC74A down     | 9 | 3.21242485 | 7.87E-05 | 0.31129133 | 0.13661202 |
| hsa-miR-1468-3p  | 9 | 3.39111556 | 1.00E-04 | 0.29488821 | 0.1870801  |
| hsa-miR-548t-5p  | 9 | 3.29492318 | 1.53E-04 | 0.30349721 | 0.17393162 |
| hsa-miR-548az-5p | 9 | 3.29492318 | 1.53E-04 | 0.30349721 | 0.17393162 |
| hsa-miR-4257     | 9 | 3.24281897 | 1.69E-04 | 0.30837367 | 0.18081516 |
| hsa-miR-150-3p   | 9 | 3.29692719 | 1.57E-04 | 0.30331273 | 0.15844671 |
| hsa-miR-875-3p   | 9 | 3.22812291 | 2.01E-04 | 0.30977755 | 0.16851215 |
| hsa-miR-411-5p   | 9 | 3.23881096 | 2.13E-04 | 0.30875529 | 0.15873016 |
| hsa-miR-4747-5p  | 9 | 3.23814295 | 2.58E-04 | 0.30881898 | 0.16106605 |
| hsa-miR-4690-5p  | 9 | 3.37174349 | 1.39E-04 | 0.29658247 | 0.1444612  |
| hsa-miR-5196-5p  | 9 | 3.23814295 | 2.58E-04 | 0.30881898 | 0.16106605 |
| hsa-miR-4514     | 9 | 3.57949232 | 1.61E-04 | 0.27936923 | 0.13789446 |
| hsa-miR-7111-5p  | 9 | 3.60688043 | 9.47E-05 | 0.27724789 | 0.15711806 |
| hsa-miR-6870-5p  | 9 | 3.60688043 | 9.47E-05 | 0.27724789 | 0.15711806 |
| hsa-miR-4723-5p  | 9 | 3.60688043 | 9.47E-05 | 0.27724789 | 0.15711806 |
| hsa-miR-4692     | 9 | 3.57949232 | 1.61E-04 | 0.27936923 | 0.13789446 |
| hsa-miR-4525     | 9 | 3.52872411 | 1.08E-04 | 0.28338855 | 0.14863548 |
| hsa-miR-196a-3p  | 9 | 3.46459586 | 1.45E-04 | 0.28863395 | 0.1621847  |
| hsa-miR-190a-5p  | 9 | 3.51068804 | 6.49E-05 | 0.28484445 | 0.14806815 |
| hsa-miR-4772-3p  | 9 | 3.53340013 | 1.97E-04 | 0.28301352 | 0.14605929 |
| CFH down         | 9 | 3.23981296 | 7.70E-05 | 0.30865979 | 0.17843459 |
| hsa-miR-4739     | 9 | 3.25217101 | 2.02E-04 | 0.30748691 | 0.16745656 |
| hsa-miR-1321     | 9 | 3.25217101 | 2.02E-04 | 0.30748691 | 0.16745656 |
| hsa-miR-4756-5p  | 9 | 3.25217101 | 2.02E-04 | 0.30748691 | 0.16745656 |
| hsa-miR-6810-5p  | 9 | 3.42718771 | 1.97E-04 | 0.29178443 | 0.15097822 |
| hsa-miR-378g     | 9 | 3.4238477  | 2.62E-04 | 0.29206907 | 0.13829201 |
| hsa-miR-759      | 9 | 3.35905144 | 2.72E-04 | 0.29770309 | 0.14486434 |
| hsa-miR-191-5p   | 9 | 3.43854375 | 9.44E-05 | 0.29082079 | 0.16246827 |
| hsa-miR-4792     | 9 | 3.46860387 | 1.86E-04 | 0.28830043 | 0.13506815 |
| CRAT down        | 9 | 3.09418838 | 4.55E-05 | 0.32318653 | 0.17004049 |
| hsa-miR-543      | 9 | 3.47261189 | 1.31E-04 | 0.28796768 | 0.1412037  |
| hsa-miR-183-3p   | 9 | 3.25951904 | 1.92E-04 | 0.30679373 | 0.16321106 |
| hsa-miR-1270     | 9 | 3.39178357 | 1.67E-04 | 0.29483013 | 0.16334731 |
| CTSf down        | 9 | 3.1509686  | 1.89E-04 | 0.31736273 | 0.15086207 |
| hsa-miR-675-5p   | 9 | 3.35504342 | 1.73E-04 | 0.29805874 | 0.1532567  |
| hsa-miR-4763-3p  | 9 | 3.45724783 | 1.44E-04 | 0.28924742 | 0.15201465 |
| hsa-miR-627-5p   | 9 | 3.4011356  | 1.01E-04 | 0.29401944 | 0.15056617 |
| hsa-miR-654-3p   | 9 | 3.36506346 | 1.39E-04 | 0.29717122 | 0.16289741 |

|                  |      |   |            |          |            |            |
|------------------|------|---|------------|----------|------------|------------|
| ETNK2            | down | 9 | 3.17167669 | 2.19E-05 | 0.31529065 | 0.18224574 |
| hsa-miR-935      |      | 9 | 3.21275885 | 2.16E-04 | 0.31125897 | 0.15696453 |
| FERMT1           | up   | 9 | 3.0741483  | 3.35E-05 | 0.32529335 | 0.2103321  |
| FGL2             | down | 9 | 3.07014028 | 7.81E-05 | 0.32571802 | 0.23203769 |
| hsa-miR-509-3-5p |      | 9 | 3.23747495 | 1.75E-04 | 0.3088827  | 0.16154634 |
| hsa-miR-7162-3p  |      | 9 | 3.28156313 | 2.39E-04 | 0.30473282 | 0.15797525 |
| hsa-miR-3194-3p  |      | 9 | 3.33633935 | 1.84E-04 | 0.2997297  | 0.1514733  |
| hsa-miR-378c     |      | 9 | 3.30227121 | 1.30E-04 | 0.30282189 | 0.17474617 |
| hsa-miR-6131     |      | 9 | 3.49131597 | 1.51E-04 | 0.28642495 | 0.1528838  |
| PLIN2            | up   | 9 | 3.21509686 | 2.85E-05 | 0.31103262 | 0.18055556 |
| hsa-miR-653-5p   |      | 8 | 3.36172345 | 1.75E-04 | 0.29746647 | 0.15829694 |
| hsa-miR-412-3p   |      | 8 | 3.45991984 | 8.35E-05 | 0.28902404 | 0.16247715 |
| hsa-miR-3685     |      | 8 | 3.52338009 | 9.50E-05 | 0.28381837 | 0.17628924 |
| hsa-miR-4689     |      | 8 | 3.36840347 | 1.42E-04 | 0.29687655 | 0.15481481 |
| hsa-miR-3915     |      | 8 | 3.3991316  | 1.30E-04 | 0.29419279 | 0.1648     |
| hsa-miR-487a-3p  |      | 8 | 3.30828323 | 1.31E-04 | 0.30227158 | 0.17953351 |
| ADAM23           | up   | 8 | 3.28256513 | 2.88E-05 | 0.3046398  | 0.30086207 |
| hsa-miR-504-5p   |      | 8 | 3.3991316  | 1.51E-04 | 0.29419279 | 0.16863208 |
| hsa-miR-1306-3p  |      | 8 | 3.31563126 | 1.25E-04 | 0.30160169 | 0.17493342 |
| hsa-miR-518c-5p  |      | 8 | 3.24281897 | 1.22E-04 | 0.30837367 | 0.18771981 |
| hsa-miR-374c-5p  |      | 8 | 3.23012692 | 2.49E-04 | 0.30958536 | 0.1687643  |
| hsa-miR-181b-3p  |      | 8 | 3.41850367 | 1.03E-04 | 0.29252565 | 0.17265886 |
| hsa-miR-4700-5p  |      | 8 | 3.64362057 | 6.27E-05 | 0.27445229 | 0.1659292  |
| hsa-miR-8089     |      | 8 | 3.64362057 | 6.27E-05 | 0.27445229 | 0.1659292  |
| hsa-miR-4667-5p  |      | 8 | 3.64362057 | 6.27E-05 | 0.27445229 | 0.1659292  |
| hsa-miR-4708-5p  |      | 8 | 3.1506346  | 2.75E-04 | 0.31739637 | 0.1854798  |
| hsa-miR-6513-5p  |      | 8 | 3.40981964 | 1.27E-04 | 0.29327064 | 0.1755276  |
| hsa-miR-4309     |      | 8 | 3.3490314  | 1.67E-04 | 0.2985938  | 0.1636236  |
| hsa-miR-3122     |      | 8 | 3.40981964 | 1.27E-04 | 0.29327064 | 0.1755276  |
| hsa-miR-1289     |      | 8 | 3.44455578 | 1.20E-04 | 0.2903132  | 0.17067308 |
| hsa-miR-4294     |      | 8 | 3.41583166 | 1.25E-04 | 0.29275447 | 0.16687294 |
| hsa-miR-3198     |      | 8 | 3.3490314  | 1.67E-04 | 0.2985938  | 0.1636236  |
| hsa-miR-4770     |      | 8 | 3.23881096 | 2.34E-04 | 0.30875529 | 0.1760706  |
| hsa-miR-6088     |      | 8 | 3.23881096 | 2.34E-04 | 0.30875529 | 0.1760706  |
| hsa-miR-4705     |      | 8 | 3.49131597 | 7.89E-05 | 0.28642495 | 0.15881764 |
| hsa-miR-5580-3p  |      | 8 | 3.55678023 | 4.31E-05 | 0.28115316 | 0.17432598 |
| hsa-miR-3924     |      | 8 | 3.47194389 | 8.14E-05 | 0.28802309 | 0.17181559 |
| hsa-miR-6851-5p  |      | 8 | 3.3496994  | 2.82E-04 | 0.29853425 | 0.16513437 |
| hsa-miR-6734-5p  |      | 8 | 3.24816299 | 2.33E-04 | 0.30786632 | 0.17020349 |
| hsa-miR-6134     |      | 8 | 3.36573146 | 1.57E-04 | 0.29711224 | 0.16186131 |
| hsa-miR-573      |      | 8 | 3.36105544 | 1.24E-04 | 0.29752559 | 0.16630277 |
| hsa-miR-544a     |      | 8 | 3.37909152 | 2.44E-04 | 0.29593753 | 0.14839072 |
| hsa-let-7a-2-3p  |      | 8 | 3.28089512 | 1.76E-04 | 0.30479487 | 0.18370752 |
| hsa-miR-411-3p   |      | 8 | 3.22879092 | 1.72E-04 | 0.30971346 | 0.18635321 |
| hsa-miR-4495     |      | 8 | 3.26887108 | 2.27E-04 | 0.30591601 | 0.1722561  |
| hsa-miR-2467-5p  |      | 8 | 3.15397462 | 2.87E-04 | 0.31706026 | 0.17222222 |
| hsa-miR-4316     |      | 8 | 3.22945892 | 2.86E-04 | 0.30964939 | 0.17091837 |

|                   |   |            |          |            |            |
|-------------------|---|------------|----------|------------|------------|
| hsa-miR-379-3p    | 8 | 3.37174349 | 1.01E-04 | 0.29658247 | 0.17503776 |
| hsa-miR-6881-3p   | 8 | 3.53473614 | 1.29E-04 | 0.28290655 | 0.15186652 |
| hsa-miR-3121-3p   | 8 | 3.35170341 | 1.37E-04 | 0.29835575 | 0.16660912 |
| hsa-miR-5008-5p   | 8 | 3.4004676  | 1.38E-04 | 0.2940772  | 0.15144984 |
| hsa-miR-6873-3p   | 8 | 3.50267201 | 1.93E-04 | 0.28549633 | 0.14835729 |
| hsa-miR-371a-5p   | 8 | 3.50200401 | 9.82E-05 | 0.28555079 | 0.1642562  |
| hsa-miR-373-5p    | 8 | 3.49799599 | 9.44E-05 | 0.28587797 | 0.16513292 |
| hsa-miR-3665      | 8 | 3.4739479  | 1.41E-04 | 0.28785694 | 0.16010436 |
| hsa-miR-4469      | 8 | 3.51937208 | 1.41E-04 | 0.2841416  | 0.15987124 |
| hsa-miR-655-5p    | 8 | 3.19205077 | 2.98E-04 | 0.31327823 | 0.17837983 |
| hsa-miR-372-5p    | 8 | 3.47995992 | 2.31E-04 | 0.28735963 | 0.16160886 |
| hsa-miR-652-3p    | 8 | 3.47929192 | 1.18E-04 | 0.2874148  | 0.15928988 |
| hsa-miR-628-3p    | 8 | 3.39512358 | 1.26E-04 | 0.29454009 | 0.16171875 |
| hsa-miR-6760-5p   | 8 | 3.56212425 | 1.29E-04 | 0.28073136 | 0.15740741 |
| hsa-miR-3119      | 8 | 3.31563126 | 1.77E-04 | 0.30160169 | 0.16771108 |
| hsa-miR-564       | 8 | 3.32164329 | 1.67E-04 | 0.30105581 | 0.16308725 |
| hsa-miR-6859-5p   | 8 | 3.32631931 | 1.88E-04 | 0.30063259 | 0.16100543 |
| hsa-miR-5088-3p   | 8 | 3.5240481  | 1.17E-04 | 0.28376457 | 0.15257353 |
| hsa-miR-3125      | 8 | 3.32631931 | 1.88E-04 | 0.30063259 | 0.16100543 |
| hsa-miR-204-3p    | 8 | 3.17935872 | 2.64E-04 | 0.31452884 | 0.16627234 |
| hsa-miR-4446-5p   | 8 | 3.17735471 | 2.64E-04 | 0.31472722 | 0.17998955 |
| hsa-miR-3916      | 8 | 3.32631931 | 1.88E-04 | 0.30063259 | 0.16100543 |
| hsa-miR-580-3p    | 8 | 3.53740815 | 5.83E-05 | 0.28269285 | 0.16456422 |
| hsa-miR-6742-3p   | 8 | 3.29692719 | 1.99E-04 | 0.30331273 | 0.16005122 |
| hsa-miR-618       | 8 | 3.26820307 | 1.82E-04 | 0.30597854 | 0.18848724 |
| hsa-miR-29b-1-5p  | 8 | 3.35771543 | 7.78E-05 | 0.29782155 | 0.18650507 |
| hsa-miR-3135b     | 8 | 3.30627923 | 1.86E-04 | 0.30245479 | 0.15478516 |
| hsa-miR-4638-5p   | 8 | 3.61556446 | 1.13E-04 | 0.27658199 | 0.15866667 |
| hsa-miR-575       | 8 | 3.63694055 | 7.75E-05 | 0.27495638 | 0.15480132 |
| hsa-miR-153-3p    | 8 | 3.2995992  | 1.51E-04 | 0.30306711 | 0.16314935 |
| hsa-miR-198       | 8 | 3.50467602 | 1.13E-04 | 0.28533308 | 0.15605263 |
| hsa-miR-6873-5p   | 8 | 3.12658651 | 2.69E-04 | 0.31983762 | 0.18009709 |
| hsa-miR-124       | 8 | 3.50935204 | 8.72E-05 | 0.28495289 | 0.15078947 |
| hsa-miR-450a-2-3p | 8 | 3.54809619 | 1.26E-04 | 0.28184129 | 0.15432802 |
| hsa-miR-6768-5p   | 8 | 3.14128257 | 2.51E-04 | 0.31834131 | 0.18221393 |
| hsa-miR-1275      | 8 | 3.45190381 | 1.35E-04 | 0.28969521 | 0.16579861 |
| hsa-miR-5572      | 8 | 3.38643955 | 1.83E-04 | 0.29529539 | 0.15605828 |
| hsa-miR-3653-3p   | 8 | 3.38977956 | 9.35E-05 | 0.29500443 | 0.17995356 |
| hsa-miR-466       | 8 | 3.15931864 | 2.18E-04 | 0.31652395 | 0.17678571 |
| hsa-miR-423-3p    | 8 | 3.54141617 | 6.46E-05 | 0.28237291 | 0.15491706 |
| hsa-miR-106b-3p   | 8 | 3.47060788 | 7.45E-05 | 0.28813396 | 0.17287234 |
| hsa-miR-1290      | 8 | 3.35905144 | 1.78E-04 | 0.29770309 | 0.16449275 |
| hsa-miR-885-3p    | 8 | 3.28289913 | 1.86E-04 | 0.30460881 | 0.16066998 |
| hsa-miR-5692a     | 8 | 3.43987976 | 1.19E-04 | 0.29070784 | 0.15587219 |
| hsa-miR-3613-5p   | 8 | 3.34235137 | 1.30E-04 | 0.29919057 | 0.16596045 |
| hsa-miR-4691-5p   | 8 | 3.26219105 | 2.54E-04 | 0.30654244 | 0.1626816  |
| hsa-miR-6792-3p   | 8 | 3.26219105 | 2.54E-04 | 0.30654244 | 0.1626816  |



|                  |   |            |          |            |            |
|------------------|---|------------|----------|------------|------------|
| hsa-miR-6875-3p  | 8 | 3.46593186 | 3.85E-04 | 0.28852269 | 0.15229358 |
| hsa-miR-4282     | 8 | 3.38710755 | 4.38E-04 | 0.29523716 | 0.16931818 |
| hsa-miR-3190-5p  | 8 | 3.60754843 | 1.32E-04 | 0.27719656 | 0.15361035 |
| hsa-miR-194-3p   | 8 | 3.36305945 | 1.45E-04 | 0.2973483  | 0.16453148 |
| hsa-miR-5680     | 8 | 3.56479626 | 1.18E-04 | 0.28052094 | 0.15235369 |
| hsa-miR-548x-3p  | 8 | 3.42651971 | 8.96E-05 | 0.29184131 | 0.1796875  |
| hsa-miR-548am-3p | 8 | 3.42651971 | 8.96E-05 | 0.29184131 | 0.1796875  |
| hsa-miR-548aj-3p | 8 | 3.42651971 | 8.96E-05 | 0.29184131 | 0.1796875  |
| hsa-miR-548aq-3p | 8 | 3.42651971 | 8.96E-05 | 0.29184131 | 0.1796875  |
| hsa-miR-548j-3p  | 8 | 3.42651971 | 8.96E-05 | 0.29184131 | 0.1796875  |
| hsa-miR-548ae-3p | 8 | 3.42651971 | 8.96E-05 | 0.29184131 | 0.1796875  |
| hsa-miR-548bb-3p | 8 | 3.46392786 | 8.22E-05 | 0.28868962 | 0.17439703 |
| hsa-miR-548ac    | 8 | 3.46392786 | 8.22E-05 | 0.28868962 | 0.17439703 |
| hsa-miR-548ah-3p | 8 | 3.42651971 | 8.96E-05 | 0.29184131 | 0.1796875  |
| hsa-miR-619-5p   | 8 | 3.42985972 | 1.25E-04 | 0.29155711 | 0.16877104 |
| hsa-miR-181c-3p  | 8 | 3.26219105 | 1.98E-04 | 0.30654244 | 0.17159498 |
| hsa-miR-200a-5p  | 8 | 3.27688711 | 1.75E-04 | 0.30516767 | 0.16454715 |
| hsa-miR-6766-5p  | 8 | 3.37174349 | 1.73E-04 | 0.29658247 | 0.16181885 |
| hsa-miR-676-3p   | 8 | 3.38777555 | 9.96E-05 | 0.29517894 | 0.16608527 |
| hsa-miR-3612     | 8 | 3.4752839  | 9.70E-05 | 0.28774628 | 0.1604512  |
| hsa-miR-1267     | 8 | 3.35303941 | 1.45E-04 | 0.29823688 | 0.17890071 |
| hsa-miR-206      | 8 | 3.3510354  | 1.14E-04 | 0.29841523 | 0.16863376 |
| hsa-miR-518a-5p  | 8 | 3.26887108 | 1.71E-04 | 0.30591601 | 0.1679401  |
| hsa-miR-1234-3p  | 8 | 3.26686707 | 1.33E-04 | 0.30610367 | 0.19001218 |
| hsa-miR-548e-5p  | 8 | 3.43653975 | 2.04E-04 | 0.29099038 | 0.15419408 |
| hsa-miR-548ab    | 8 | 3.38911156 | 7.91E-05 | 0.29506258 | 0.21191406 |
| hsa-miR-432-3p   | 8 | 3.35704743 | 1.42E-04 | 0.29788081 | 0.16360029 |
| hsa-miR-3940-5p  | 8 | 3.32364729 | 1.75E-04 | 0.30087428 | 0.15955285 |
| hsa-miR-4521     | 8 | 3.30895124 | 1.20E-04 | 0.30221056 | 0.16644823 |
| hsa-miR-659-3p   | 8 | 3.250167   | 1.58E-04 | 0.3076765  | 0.17413895 |
| hsa-miR-4710     | 8 | 3.45858383 | 2.69E-04 | 0.28913568 | 0.15353261 |
| hsa-miR-4695-5p  | 8 | 3.52805611 | 1.22E-04 | 0.2834422  | 0.16442953 |
| hsa-miR-3133     | 8 | 3.35905144 | 1.11E-04 | 0.29770309 | 0.16871387 |
| hsa-miR-4510     | 8 | 3.45257181 | 9.22E-05 | 0.28963916 | 0.17684022 |
| hsa-miR-758-3p   | 8 | 3.31696727 | 1.11E-04 | 0.30148021 | 0.18641232 |
| hsa-miR-6133     | 8 | 3.45257181 | 9.22E-05 | 0.28963916 | 0.17684022 |
| hsa-miR-6127     | 8 | 3.45257181 | 9.22E-05 | 0.28963916 | 0.17684022 |
| hsa-miR-6130     | 8 | 3.45257181 | 9.22E-05 | 0.28963916 | 0.17684022 |
| hsa-miR-6129     | 8 | 3.45257181 | 9.22E-05 | 0.28963916 | 0.17684022 |
| hsa-miR-4419a    | 8 | 3.45257181 | 9.22E-05 | 0.28963916 | 0.17684022 |
| hsa-miR-1296-3p  | 8 | 3.46526386 | 1.50E-04 | 0.28857831 | 0.15653358 |
| hsa-miR-6832-5p  | 8 | 3.47995992 | 1.19E-04 | 0.28735963 | 0.15248054 |
| hsa-miR-4659a-3p | 8 | 3.49665999 | 2.89E-04 | 0.2859872  | 0.16931352 |
| hsa-miR-576-5p   | 8 | 3.42919172 | 1.43E-04 | 0.29161391 | 0.17035775 |
| hsa-miR-548az-3p | 8 | 3.38042752 | 1.20E-04 | 0.29582057 | 0.18117331 |
| hsa-miR-3657     | 8 | 3.47995992 | 1.79E-04 | 0.28735963 | 0.14795455 |
| GYS2 down        | 8 | 3.38076152 | 1.43E-04 | 0.29579135 | 0.14861111 |

|                  |   |            |          |            |            |
|------------------|---|------------|----------|------------|------------|
| hsa-miR-378d     | 8 | 3.36506346 | 8.15E-05 | 0.29717122 | 0.1927689  |
| hsa-miR-3934-5p  | 8 | 3.56145625 | 1.53E-04 | 0.28078402 | 0.15       |
| IL11RA down      | 8 | 3.3493654  | 7.30E-04 | 0.29856402 | 0.18861607 |
| ORAI3 down       | 8 | 3.06746827 | 6.84E-05 | 0.32600174 | 0.17756184 |
| PLK3 down        | 8 | 3.17702071 | 5.86E-05 | 0.3147603  | 0.20170455 |
| SPNS2 down       | 8 | 3.17100868 | 1.55E-04 | 0.31535707 | 0.14988688 |
| TPPP3 down       | 8 | 3.11356045 | 7.54E-05 | 0.32117571 | 0.16583665 |
| hsa-miR-1273e    | 7 | 3.48196393 | 8.13E-05 | 0.28719424 | 0.18331957 |
| hsa-miR-604      | 7 | 3.25818303 | 1.59E-04 | 0.30691953 | 0.19511367 |
| hsa-miR-380-5p   | 7 | 3.35771543 | 1.05E-04 | 0.29782155 | 0.18003342 |
| hsa-miR-2276-5p  | 7 | 3.55477622 | 1.11E-04 | 0.28131166 | 0.16575298 |
| ADAM33 down      | 7 | 3.35537742 | 5.52E-05 | 0.29802907 | 0.175      |
| hsa-miR-4742-3p  | 7 | 3.47995992 | 1.36E-04 | 0.28735963 | 0.17920045 |
| hsa-miR-7155-5p  | 7 | 3.66165665 | 4.74E-05 | 0.27310043 | 0.18843985 |
| hsa-miR-3926     | 7 | 3.58416834 | 8.05E-05 | 0.27900475 | 0.17283494 |
| hsa-miR-4639-3p  | 7 | 3.58283233 | 5.28E-05 | 0.27910879 | 0.17346939 |
| hsa-miR-6832-3p  | 7 | 3.24549098 | 1.90E-04 | 0.30811979 | 0.19031085 |
| hsa-miR-571      | 7 | 3.42785571 | 1.18E-04 | 0.29172757 | 0.19198664 |
| hsa-miR-5095     | 7 | 3.4004676  | 1.40E-04 | 0.2940772  | 0.18546759 |
| hsa-miR-7151-3p  | 7 | 3.4004676  | 1.40E-04 | 0.2940772  | 0.18546759 |
| hsa-miR-4666a-3p | 7 | 3.28356713 | 1.43E-04 | 0.30454684 | 0.197032   |
| hsa-miR-297      | 7 | 3.48797595 | 8.67E-05 | 0.28669922 | 0.18568718 |
| hsa-miR-520d-5p  | 7 | 3.1740147  | 2.19E-04 | 0.3150584  | 0.19067481 |
| hsa-miR-4651     | 7 | 3.26419506 | 1.68E-04 | 0.30635424 | 0.19530711 |
| hsa-miR-6819-5p  | 7 | 3.31095524 | 1.48E-04 | 0.30202764 | 0.1829958  |
| hsa-miR-1231     | 7 | 3.46659987 | 8.59E-05 | 0.2884671  | 0.17966538 |
| hsa-miR-6812-5p  | 7 | 3.31095524 | 1.48E-04 | 0.30202764 | 0.1829958  |
| hsa-miR-4465     | 7 | 3.46593186 | 1.21E-04 | 0.28852269 | 0.17857143 |
| hsa-miR-6737-5p  | 7 | 3.31095524 | 1.48E-04 | 0.30202764 | 0.1829958  |
| hsa-miR-670-3p   | 7 | 3.34502338 | 2.00E-04 | 0.29895157 | 0.18091253 |
| hsa-miR-1297     | 7 | 3.46593186 | 1.21E-04 | 0.28852269 | 0.17857143 |
| hsa-miR-302f     | 7 | 3.54342017 | 8.56E-05 | 0.28221322 | 0.17300131 |
| hsa-miR-6736-3p  | 7 | 3.53072812 | 7.87E-05 | 0.2832277  | 0.17817372 |
| hsa-miR-4667-3p  | 7 | 3.48663995 | 1.15E-04 | 0.28680908 | 0.16731518 |
| hsa-miR-6512-3p  | 7 | 3.37909152 | 1.14E-04 | 0.29593753 | 0.17748918 |
| hsa-miR-6720-5p  | 7 | 3.37909152 | 1.14E-04 | 0.29593753 | 0.17748918 |
| hsa-miR-4736     | 7 | 3.54008016 | 1.22E-04 | 0.28247948 | 0.17987013 |
| hsa-miR-371b-5p  | 7 | 3.53674015 | 7.53E-05 | 0.28274625 | 0.18418484 |
| hsa-miR-3919     | 7 | 3.41115564 | 1.19E-04 | 0.29315578 | 0.17817773 |
| hsa-miR-6780b-5p | 7 | 3.58951236 | 7.56E-05 | 0.27858937 | 0.17105263 |
| hsa-miR-4725-3p  | 7 | 3.58951236 | 7.56E-05 | 0.27858937 | 0.17105263 |
| hsa-miR-4271     | 7 | 3.58951236 | 7.56E-05 | 0.27858937 | 0.17105263 |
| hsa-miR-508-5p   | 7 | 3.44054776 | 7.69E-05 | 0.29065139 | 0.1962406  |
| hsa-miR-3158-3p  | 7 | 3.29692719 | 1.35E-04 | 0.30331273 | 0.18956743 |
| hsa-miR-6852-5p  | 7 | 3.34635939 | 1.67E-04 | 0.29883222 | 0.17823129 |
| hsa-miR-4755-5p  | 7 | 3.18670675 | 2.37E-04 | 0.31380358 | 0.19984883 |
| hsa-miR-4452     | 7 | 3.51670007 | 1.07E-04 | 0.28435749 | 0.1848195  |

|                  |   |            |          |            |            |
|------------------|---|------------|----------|------------|------------|
| hsa-miR-6083     | 7 | 3.42251169 | 9.31E-05 | 0.29218308 | 0.187835   |
| hsa-miR-6770-5p  | 7 | 3.62625251 | 9.02E-05 | 0.27576679 | 0.17567568 |
| hsa-miR-146b-3p  | 7 | 3.38309953 | 1.45E-04 | 0.29558693 | 0.19033101 |
| hsa-miR-767-5p   | 7 | 3.51336005 | 5.60E-05 | 0.28462782 | 0.1951584  |
| hsa-miR-3187-3p  | 7 | 3.43653975 | 9.69E-05 | 0.29099038 | 0.18675595 |
| hsa-miR-455-5p   | 7 | 3.3997996  | 7.95E-05 | 0.29413498 | 0.20423766 |
| hsa-miR-640      | 7 | 3.59485638 | 1.20E-04 | 0.27817523 | 0.18894009 |
| ARHGAP10 down    | 7 | 3.16299265 | 4.63E-05 | 0.31615628 | 0.2083947  |
| hsa-miR-216a-5p  | 7 | 3.59418838 | 2.14E-05 | 0.27822693 | 0.2009824  |
| hsa-miR-506-3p   | 7 | 3.37107548 | 1.03E-04 | 0.29664124 | 0.18318828 |
| hsa-miR-4676-5p  | 7 | 3.63226453 | 7.31E-05 | 0.27531034 | 0.1713367  |
| hsa-miR-1237-5p  | 7 | 3.5501002  | 8.37E-05 | 0.28168219 | 0.17363667 |
| hsa-miR-5003-3p  | 7 | 3.44054776 | 9.07E-05 | 0.29065139 | 0.18156843 |
| hsa-miR-3661     | 7 | 3.50133601 | 7.63E-05 | 0.28560527 | 0.18219462 |
| hsa-miR-346      | 7 | 3.69572478 | 7.14E-04 | 0.27058292 | 0.16307278 |
| AVP11 down       | 7 | 3.19839679 | 3.58E-05 | 0.31265664 | 0.21853741 |
| hsa-miR-509-3p   | 7 | 3.62291249 | 9.41E-05 | 0.27602102 | 0.16499582 |
| hsa-miR-4330     | 7 | 3.42050768 | 1.09E-04 | 0.29235426 | 0.18350564 |
| hsa-miR-302a-5p  | 7 | 3.40848363 | 8.13E-05 | 0.2933856  | 0.18700878 |
| hsa-miR-4789-3p  | 7 | 3.250835   | 1.41E-04 | 0.30761327 | 0.18693009 |
| hsa-miR-1225-3p  | 7 | 3.58884436 | 1.08E-04 | 0.27864123 | 0.16971584 |
| hsa-miR-556-5p   | 7 | 3.33700735 | 1.78E-04 | 0.2996697  | 0.17897047 |
| BLNK down        | 7 | 3.23914496 | 2.47E-05 | 0.30872345 | 0.30612245 |
| hsa-miR-3691-5p  | 7 | 3.38710755 | 1.05E-04 | 0.29523716 | 0.19530393 |
| hsa-miR-10b-3p   | 7 | 3.55811623 | 8.58E-05 | 0.28104759 | 0.17657282 |
| hsa-miR-3678-3p  | 7 | 3.46993988 | 1.29E-04 | 0.28818943 | 0.17207183 |
| C14orf132down    | 7 | 3.17768871 | 1.06E-05 | 0.31469413 | 0.27102041 |
| hsa-miR-374a-3p  | 7 | 3.54342017 | 4.31E-05 | 0.28221322 | 0.17831814 |
| hsa-miR-6734-3p  | 7 | 3.51202405 | 1.06E-04 | 0.28473609 | 0.16715457 |
| hsa-miR-6506-5p  | 7 | 3.46993988 | 9.26E-05 | 0.28818943 | 0.18941799 |
| CADM3 down       | 7 | 3.67668671 | 7.95E-05 | 0.27198401 | 0.19714286 |
| hsa-miR-3667-3p  | 7 | 3.49465598 | 1.10E-04 | 0.2861512  | 0.17807833 |
| hsa-miR-320e     | 7 | 3.41382766 | 9.87E-05 | 0.29292633 | 0.17507221 |
| hsa-miR-6507-3p  | 7 | 3.46593186 | 8.96E-05 | 0.28852269 | 0.17148158 |
| hsa-miR-4691-3p  | 7 | 3.39779559 | 1.39E-04 | 0.29430846 | 0.17671472 |
| hsa-miR-548aq-5p | 7 | 3.4238477  | 5.31E-05 | 0.29206907 | 0.23994218 |
| hsa-miR-548ap-5p | 7 | 3.4238477  | 5.31E-05 | 0.29206907 | 0.23994218 |
| hsa-miR-548as-5p | 7 | 3.4238477  | 5.31E-05 | 0.29206907 | 0.23994218 |
| hsa-miR-548ar-5p | 7 | 3.4238477  | 5.31E-05 | 0.29206907 | 0.23994218 |
| hsa-miR-548ae-5p | 7 | 3.4238477  | 5.31E-05 | 0.29206907 | 0.23994218 |
| hsa-miR-559      | 7 | 3.4238477  | 5.31E-05 | 0.29206907 | 0.23994218 |
| hsa-miR-548ad-5p | 7 | 3.4238477  | 5.31E-05 | 0.29206907 | 0.23994218 |
| hsa-miR-3192-5p  | 7 | 3.55878424 | 8.65E-05 | 0.28099484 | 0.18440934 |
| hsa-miR-548bb-5p | 7 | 3.4238477  | 5.31E-05 | 0.29206907 | 0.23994218 |
| hsa-miR-548ay-5p | 7 | 3.4238477  | 5.31E-05 | 0.29206907 | 0.23994218 |
| hsa-miR-514a-3p  | 7 | 3.47862391 | 5.79E-05 | 0.28747    | 0.18154762 |
| hsa-miR-1915-5p  | 7 | 3.32765531 | 1.38E-04 | 0.30051189 | 0.19482237 |

|                  |   |            |          |            |            |
|------------------|---|------------|----------|------------|------------|
| hsa-miR-4803     | 7 | 3.22277889 | 1.62E-04 | 0.31029122 | 0.20608108 |
| hsa-miR-147a     | 7 | 3.33299933 | 1.04E-04 | 0.30003006 | 0.19331223 |
| hsa-miR-4524a-5p | 7 | 3.35237141 | 1.17E-04 | 0.2982963  | 0.19286739 |
| hsa-miR-8080     | 7 | 3.23413494 | 1.79E-04 | 0.30920169 | 0.18676278 |
| hsa-miR-527      | 7 | 3.27287909 | 1.57E-04 | 0.30554138 | 0.18959761 |
| hsa-miR-490-3p   | 7 | 3.34235137 | 1.36E-04 | 0.29919057 | 0.1861413  |
| hsa-miR-4781-3p  | 7 | 3.37040748 | 1.09E-04 | 0.29670003 | 0.18550107 |
| hsa-miR-6891-5p  | 7 | 3.50467602 | 1.42E-04 | 0.28533308 | 0.18268943 |
| hsa-miR-3173-3p  | 7 | 3.50467602 | 1.42E-04 | 0.28533308 | 0.18268943 |
| hsa-miR-6741-3p  | 7 | 3.62224449 | 9.89E-05 | 0.27607192 | 0.17711172 |
| CFD down         | 7 | 3.3987976  | 1.16E-05 | 0.2942217  | 0.22093023 |
| hsa-miR-34c-3p   | 7 | 3.37975952 | 1.30E-04 | 0.29587904 | 0.17943201 |
| hsa-miR-6797-5p  | 7 | 3.54809619 | 6.02E-05 | 0.28184129 | 0.18239203 |
| hsa-miR-1249-5p  | 7 | 3.54809619 | 6.02E-05 | 0.28184129 | 0.18239203 |
| hsa-miR-4481     | 7 | 3.4245157  | 1.61E-04 | 0.29201209 | 0.17502365 |
| hsa-miR-4745-5p  | 7 | 3.4245157  | 1.61E-04 | 0.29201209 | 0.17502365 |
| hsa-miR-5693     | 7 | 3.59151637 | 1.09E-04 | 0.27843393 | 0.16897081 |
| hsa-miR-5688     | 7 | 3.35971944 | 8.99E-05 | 0.2976439  | 0.19875776 |
| hsa-miR-584-5p   | 7 | 3.48263193 | 4.22E-05 | 0.28713916 | 0.20379819 |
| hsa-miR-2682-5p  | 7 | 3.54074816 | 3.97E-05 | 0.28242619 | 0.18660287 |
| hsa-miR-4254     | 7 | 3.49064796 | 1.04E-04 | 0.28647976 | 0.15935141 |
| hsa-miR-2115-5p  | 7 | 3.5487642  | 1.00E-04 | 0.28178824 | 0.17011494 |
| DCT down         | 7 | 3.58717435 | 9.35E-06 | 0.27877095 | 0.31845238 |
| hsa-miR-548p     | 7 | 3.44321977 | 8.80E-05 | 0.29042584 | 0.18513885 |
| hsa-miR-124-5p   | 7 | 3.60420842 | 4.50E-05 | 0.27745343 | 0.17792208 |
| hsa-let-7c-3p    | 7 | 3.39846359 | 1.12E-04 | 0.29425061 | 0.18544389 |
| ENO3 down        | 7 | 3.26052104 | 1.39E-05 | 0.30669945 | 0.30708661 |
| hsa-miR-24-1-5p  | 7 | 3.31629927 | 1.00E-04 | 0.30154094 | 0.19243921 |
| hsa-miR-552-5p   | 7 | 3.40714763 | 1.41E-04 | 0.29350064 | 0.18192142 |
| hsa-miR-134-5p   | 7 | 3.40447562 | 7.56E-05 | 0.29373099 | 0.19472247 |
| FNDC4 down       | 7 | 3.0748163  | 1.88E-05 | 0.32522268 | 0.26785714 |
| hsa-miR-6771-3p  | 7 | 3.31295925 | 2.01E-04 | 0.30184494 | 0.17735283 |
| hsa-miR-4733-5p  | 7 | 3.4004676  | 2.10E-04 | 0.2940772  | 0.17398119 |
| hsa-miR-4524a-3p | 7 | 3.53072812 | 9.96E-05 | 0.2832277  | 0.17174603 |
| GADD45B down     | 7 | 3.45424182 | 4.11E-05 | 0.28949913 | 0.30892857 |
| hsa-miR-519e-5p  | 7 | 3.48396794 | 1.32E-04 | 0.28702905 | 0.16464891 |
| hsa-miR-515-5p   | 7 | 3.48396794 | 1.32E-04 | 0.28702905 | 0.16464891 |
| hsa-miR-7154-3p  | 7 | 3.43319973 | 1.03E-04 | 0.29127347 | 0.17777778 |
| hsa-miR-6805-3p  | 7 | 3.40781563 | 1.11E-04 | 0.2934431  | 0.18514286 |
| hsa-miR-5691     | 7 | 3.40781563 | 1.11E-04 | 0.2934431  | 0.18514286 |
| hsa-miR-1303     | 7 | 3.54342017 | 9.07E-05 | 0.28221322 | 0.17096019 |
| hsa-miR-512-3p   | 7 | 3.32297929 | 1.41E-04 | 0.30093477 | 0.18958967 |
| hsa-miR-6501-5p  | 7 | 3.59485638 | 5.64E-05 | 0.27817523 | 0.17740683 |
| hsa-miR-4423-5p  | 7 | 3.59485638 | 5.64E-05 | 0.27817523 | 0.17740683 |
| hsa-miR-1246     | 7 | 3.17668671 | 1.86E-04 | 0.3147934  | 0.19790576 |
| hsa-miR-378i     | 7 | 3.3243153  | 1.12E-04 | 0.30081382 | 0.1999618  |
| PCOLCE2 down     | 7 | 3.11155645 | 2.67E-05 | 0.32138257 | 0.24390244 |

|                  |      |   |            |            |            |            |
|------------------|------|---|------------|------------|------------|------------|
| PI3              | up   | 7 | 3.17368069 | 6.58E-06   | 0.31509156 | 0.39068666 |
| PLA2G4E          | up   | 7 | 3.71008684 | 0.00134437 | 0.26953547 | 0.16943522 |
| PPP1R3C          | down | 7 | 3.19572478 | 4.58E-05   | 0.31291806 | 0.17391304 |
| RNASE4           | down | 7 | 3.08617234 | 4.18E-05   | 0.32402597 | 0.2318158  |
| SLCO4A1          | down | 7 | 3.03674015 | 5.20E-05   | 0.32930048 | 0.21312238 |
| SORBS1           | down | 7 | 3.1255845  | 4.58E-05   | 0.31994016 | 0.19373777 |
| TCP11L2          | down | 7 | 3.1503006  | 3.55E-05   | 0.31743003 | 0.18610747 |
| hsa-miR-376b-3p  |      | 6 | 3.44722779 | 9.28E-05   | 0.29008817 | 0.20151771 |
| ABTB2            | down | 6 | 3.08817635 | 4.59E-05   | 0.3238157  | 0.22161836 |
| hsa-miR-5004-5p  |      | 6 | 3.50267201 | 1.37E-04   | 0.28549633 | 0.19004065 |
| hsa-miR-4751     |      | 6 | 3.79058116 | 5.29E-05   | 0.26381179 | 0.19879518 |
| hsa-miR-339-3p   |      | 6 | 3.64228457 | 5.58E-05   | 0.27455296 | 0.19401445 |
| ADA              | up   | 6 | 3.18770875 | 2.68E-05   | 0.31370495 | 0.22916667 |
| hsa-miR-6819-3p  |      | 6 | 3.69772879 | 7.52E-05   | 0.27043627 | 0.18055556 |
| hsa-miR-1243     |      | 6 | 3.34569138 | 8.10E-05   | 0.29889188 | 0.2212766  |
| hsa-miR-6762-5p  |      | 6 | 3.46125585 | 1.15E-04   | 0.28891248 | 0.20143885 |
| hsa-miR-6845-5p  |      | 6 | 3.46125585 | 1.15E-04   | 0.28891248 | 0.20143885 |
| hsa-miR-4534     |      | 6 | 3.46325985 | 8.78E-05   | 0.2887453  | 0.2253194  |
| hsa-miR-8055     |      | 6 | 3.49064796 | 1.01E-04   | 0.28647976 | 0.20333988 |
| hsa-miR-8081     |      | 6 | 3.51469606 | 6.84E-05   | 0.28451962 | 0.21319444 |
| hsa-miR-3944-5p  |      | 6 | 3.35170341 | 2.24E-04   | 0.29835575 | 0.20294944 |
| hsa-miR-556-3p   |      | 6 | 3.37374749 | 7.12E-05   | 0.2964063  | 0.20664668 |
| hsa-miR-4735-5p  |      | 6 | 3.48196393 | 1.03E-04   | 0.28719424 | 0.19568021 |
| hsa-miR-383-3p   |      | 6 | 3.53607214 | 6.17E-05   | 0.28279966 | 0.22781506 |
| hsa-miR-3199     |      | 6 | 3.48730795 | 7.17E-05   | 0.28675414 | 0.20235756 |
| hsa-miR-4438     |      | 6 | 3.47661991 | 1.29E-04   | 0.2876357  | 0.19824891 |
| hsa-miR-98-3p    |      | 6 | 3.48730795 | 5.91E-05   | 0.28675414 | 0.21405229 |
| hsa-miR-6087     |      | 6 | 3.65898464 | 6.38E-05   | 0.27329986 | 0.20483871 |
| hsa-miR-524-5p   |      | 6 | 3.30761523 | 1.28E-04   | 0.30233263 | 0.20336788 |
| hsa-miR-6886-3p  |      | 6 | 3.58350033 | 7.40E-05   | 0.27905676 | 0.19644444 |
| hsa-miR-3978     |      | 6 | 3.48329993 | 5.44E-05   | 0.28708409 | 0.2063185  |
| hsa-miR-126-3p   |      | 6 | 3.5988644  | 4.56E-05   | 0.27786543 | 0.18686869 |
| hsa-miR-1287-5p  |      | 6 | 3.43921176 | 9.06E-05   | 0.2907643  | 0.19736842 |
| hsa-miR-6742-5p  |      | 6 | 3.41716767 | 1.17E-04   | 0.29264002 | 0.20475419 |
| hsa-miR-6747-5p  |      | 6 | 3.33233133 | 1.23E-04   | 0.30009021 | 0.20988475 |
| hsa-miR-5697     |      | 6 | 3.40514362 | 9.67E-05   | 0.29367337 | 0.21428571 |
| hsa-miR-7111-3p  |      | 6 | 3.54141617 | 8.39E-05   | 0.28237291 | 0.19310345 |
| hsa-miR-6744-3p  |      | 6 | 3.62625251 | 6.50E-05   | 0.27576679 | 0.20705521 |
| hsa-miR-593-3p   |      | 6 | 3.250835   | 1.90E-04   | 0.30761327 | 0.20407364 |
| hsa-miR-4757-5p  |      | 6 | 3.62625251 | 6.50E-05   | 0.27576679 | 0.20705521 |
| hsa-miR-8073     |      | 6 | 3.46192385 | 1.03E-04   | 0.28885673 | 0.20556553 |
| hsa-miR-1245b-3p |      | 6 | 3.53006012 | 6.32E-05   | 0.28328129 | 0.20581655 |
| hsa-miR-874-5p   |      | 6 | 3.66032064 | 5.28E-05   | 0.27320011 | 0.18538647 |
| hsa-miR-7110-3p  |      | 6 | 3.5253841  | 9.49E-05   | 0.28365703 | 0.20299145 |
| hsa-miR-513b-5p  |      | 6 | 3.3496994  | 1.37E-04   | 0.29853425 | 0.21441948 |
| hsa-miR-216a-3p  |      | 6 | 3.38643955 | 1.07E-04   | 0.29529539 | 0.20896274 |
| hsa-miR-3681-3p  |      | 6 | 3.38643955 | 1.07E-04   | 0.29529539 | 0.20896274 |

|                  |   |            |          |            |            |
|------------------|---|------------|----------|------------|------------|
| hsa-miR-3123     | 6 | 3.38577154 | 1.19E-04 | 0.29535365 | 0.20718654 |
| hsa-miR-129-2-3p | 6 | 3.53139613 | 7.09E-05 | 0.28317412 | 0.19814815 |
| hsa-miR-888-3p   | 6 | 3.39111556 | 1.55E-04 | 0.29488821 | 0.19150026 |
| hsa-miR-891a-3p  | 6 | 3.4512358  | 6.47E-05 | 0.28975128 | 0.21687463 |
| hsa-miR-4306     | 6 | 3.39044756 | 1.01E-04 | 0.29494631 | 0.20820896 |
| hsa-miR-302d-5p  | 6 | 3.46259185 | 8.72E-05 | 0.288801   | 0.20870871 |
| hsa-miR-4268     | 6 | 3.48062792 | 7.79E-05 | 0.28730448 | 0.20662949 |
| hsa-miR-6124     | 6 | 3.33967936 | 1.07E-04 | 0.29942994 | 0.21300138 |
| hsa-miR-4644     | 6 | 3.39044756 | 1.01E-04 | 0.29494631 | 0.20820896 |
| hsa-miR-3154     | 6 | 3.49398798 | 9.73E-05 | 0.28620591 | 0.18964401 |
| hsa-miR-4709-3p  | 6 | 3.30561122 | 2.48E-04 | 0.30251591 | 0.20751847 |
| hsa-miR-4324     | 6 | 3.46593186 | 1.39E-04 | 0.28852269 | 0.19174312 |
| hsa-miR-5590-3p  | 6 | 3.2762191  | 1.26E-04 | 0.30522989 | 0.21851852 |
| hsa-miR-5581-5p  | 6 | 3.49599198 | 3.19E-05 | 0.28604185 | 0.24153117 |
| hsa-miR-1202     | 6 | 3.34502338 | 9.73E-05 | 0.29895157 | 0.21468531 |
| hsa-miR-519d-5p  | 6 | 3.3249833  | 1.29E-04 | 0.30075339 | 0.21151272 |
| hsa-miR-3194-5p  | 6 | 3.7738811  | 4.45E-05 | 0.2649792  | 0.19105691 |
| hsa-miR-4301     | 6 | 3.50334001 | 7.37E-05 | 0.28544189 | 0.19139566 |
| hsa-miR-4260     | 6 | 3.63760855 | 5.94E-05 | 0.27490589 | 0.19262721 |
| hsa-miR-6846-5p  | 6 | 3.52137609 | 6.68E-05 | 0.28397989 | 0.20393812 |
| hsa-miR-6848-5p  | 6 | 3.52137609 | 6.68E-05 | 0.28397989 | 0.20393812 |
| hsa-miR-4665-5p  | 6 | 3.56947228 | 5.40E-05 | 0.28015346 | 0.20783373 |
| hsa-miR-153-5p   | 6 | 3.56947228 | 4.12E-05 | 0.28015346 | 0.19160432 |
| hsa-miR-4488     | 6 | 3.5761523  | 4.93E-05 | 0.27963015 | 0.20119352 |
| hsa-miR-4672     | 6 | 3.28557114 | 1.16E-04 | 0.30436109 | 0.22357724 |
| hsa-miR-4697-5p  | 6 | 3.5761523  | 4.93E-05 | 0.27963015 | 0.20119352 |
| hsa-miR-2681-5p  | 6 | 3.36239145 | 6.37E-05 | 0.29740737 | 0.21873479 |
| hsa-miR-8076     | 6 | 3.41249165 | 1.26E-04 | 0.29304101 | 0.21525516 |
| hsa-miR-3127-5p  | 6 | 3.62692051 | 4.16E-05 | 0.275716   | 0.1965812  |
| hsa-miR-6836-3p  | 6 | 3.68904476 | 8.46E-05 | 0.27107288 | 0.19376694 |
| hsa-miR-3144-5p  | 6 | 3.50801603 | 7.31E-05 | 0.28506141 | 0.20560109 |
| hsa-miR-6795-5p  | 6 | 3.67100868 | 5.54E-05 | 0.27240469 | 0.1942446  |
| hsa-miR-634      | 6 | 3.3009352  | 1.09E-04 | 0.30294445 | 0.21323846 |
| hsa-miR-6722-3p  | 6 | 3.60621242 | 4.28E-05 | 0.27729925 | 0.20224719 |
| hsa-miR-1909-3p  | 6 | 3.60621242 | 4.28E-05 | 0.27729925 | 0.20224719 |
| hsa-miR-4530     | 6 | 3.58350033 | 9.28E-05 | 0.27905676 | 0.19650469 |
| hsa-miR-6887-5p  | 6 | 3.67100868 | 5.54E-05 | 0.27240469 | 0.1942446  |
| hsa-miR-4756-3p  | 6 | 3.46392786 | 6.31E-05 | 0.28868962 | 0.19922342 |
| hsa-miR-4311     | 6 | 3.3991316  | 7.90E-05 | 0.29419279 | 0.20514862 |
| hsa-miR-1233-3p  | 6 | 3.59752839 | 9.04E-05 | 0.27796862 | 0.1928839  |
| hsa-miR-3619-3p  | 6 | 3.58416834 | 5.26E-05 | 0.27900475 | 0.20206093 |
| hsa-miR-5001-3p  | 6 | 3.70307281 | 9.35E-05 | 0.270046   | 0.18741894 |
| hsa-miR-4455     | 6 | 3.44789579 | 1.34E-04 | 0.29003197 | 0.20581257 |
| hsa-miR-507      | 6 | 3.56947228 | 5.73E-05 | 0.28015346 | 0.19891122 |
| hsa-miR-4302     | 6 | 3.37842351 | 1.04E-04 | 0.29599605 | 0.22100922 |
| hsa-miR-656-3p   | 6 | 3.31229125 | 1.43E-04 | 0.30190582 | 0.21618674 |
| hsa-miR-661      | 6 | 3.5260521  | 1.28E-04 | 0.2836033  | 0.19414317 |

|                  |   |            |          |            |            |
|------------------|---|------------|----------|------------|------------|
| hsa-miR-4731-5p  | 6 | 3.32030728 | 1.07E-04 | 0.30117694 | 0.22925079 |
| hsa-miR-4643     | 6 | 3.41917168 | 1.30E-04 | 0.2924685  | 0.19916667 |
| hsa-miR-323a-3p  | 6 | 3.47327989 | 6.26E-05 | 0.2879123  | 0.20238095 |
| hsa-miR-302c-5p  | 6 | 3.53340013 | 5.53E-05 | 0.28301352 | 0.20730798 |
| hsa-miR-944      | 6 | 3.35905144 | 6.89E-05 | 0.29770309 | 0.22238443 |
| hsa-miR-5683     | 6 | 3.45791583 | 1.04E-04 | 0.28919154 | 0.19002849 |
| hsa-miR-4325     | 6 | 3.40781563 | 1.60E-04 | 0.2934431  | 0.21265284 |
| hsa-miR-5197-3p  | 6 | 3.30561122 | 1.13E-04 | 0.30251591 | 0.21468927 |
| hsa-miR-500a-5p  | 6 | 3.38977956 | 7.69E-05 | 0.29500443 | 0.21350932 |
| hsa-miR-1281     | 6 | 3.4498998  | 2.35E-04 | 0.28986349 | 0.19872906 |
| hsa-miR-3202     | 6 | 3.27889112 | 1.25E-04 | 0.30498116 | 0.22305141 |
| hsa-miR-676-5p   | 6 | 3.32899132 | 7.79E-05 | 0.30039129 | 0.22435897 |
| hsa-miR-4735-3p  | 6 | 3.24014696 | 1.05E-04 | 0.30862798 | 0.23522596 |
| hsa-miR-3973     | 6 | 3.33901136 | 8.42E-05 | 0.29948985 | 0.23310023 |
| hsa-miR-6885-3p  | 6 | 3.42117568 | 8.72E-05 | 0.29229718 | 0.19202899 |
| hsa-miR-4733-3p  | 6 | 3.46593186 | 7.54E-05 | 0.28852269 | 0.20235878 |
| hsa-miR-525-5p   | 6 | 3.50935204 | 8.81E-05 | 0.28495289 | 0.20462388 |
| hsa-miR-1263     | 6 | 3.36372745 | 8.79E-05 | 0.29728925 | 0.22092457 |
| hsa-miR-6507-5p  | 6 | 3.47327989 | 8.13E-05 | 0.2879123  | 0.21676301 |
| hsa-miR-514b-3p  | 6 | 3.48062792 | 4.88E-05 | 0.28730448 | 0.2081749  |
| hsa-miR-1273g-3p | 6 | 3.59485638 | 5.70E-05 | 0.27817523 | 0.1902921  |
| hsa-miR-3185     | 6 | 3.52338009 | 1.23E-04 | 0.28381837 | 0.20787746 |
| hsa-miR-1285-3p  | 6 | 3.54141617 | 1.31E-04 | 0.28237291 | 0.19042232 |
| hsa-miR-548s     | 6 | 3.45791583 | 1.34E-04 | 0.28919154 | 0.19489008 |
| CNTFR down       | 6 | 3.25517702 | 1.65E-05 | 0.30720296 | 0.19791667 |
| hsa-miR-7855-5p  | 6 | 3.54742819 | 1.04E-04 | 0.28189436 | 0.18736383 |
| hsa-miR-33b-3p   | 6 | 3.499332   | 3.33E-05 | 0.28576883 | 0.22597137 |
| hsa-miR-4659b-3p | 6 | 3.57748831 | 1.71E-04 | 0.27952572 | 0.18993232 |
| hsa-miR-133b     | 6 | 3.52738811 | 4.40E-05 | 0.28349588 | 0.21879433 |
| hsa-miR-376c-3p  | 6 | 3.49732799 | 7.97E-05 | 0.28593258 | 0.20505051 |
| hsa-miR-6833-3p  | 6 | 3.64094856 | 8.15E-05 | 0.2746537  | 0.1811828  |
| hsa-miR-4768-5p  | 6 | 3.64094856 | 8.15E-05 | 0.2746537  | 0.1811828  |
| CYSLTR1 down     | 6 | 3.21710087 | 1.00E-04 | 0.31083887 | 0.19607843 |
| hsa-miR-4772-5p  | 6 | 3.46259185 | 9.45E-05 | 0.288801   | 0.20377242 |
| hsa-miR-6798-5p  | 6 | 3.63293253 | 5.60E-05 | 0.27525972 | 0.18981481 |
| hsa-miR-542-5p   | 6 | 3.52738811 | 1.42E-04 | 0.28349588 | 0.21212121 |
| hsa-miR-5002-5p  | 6 | 3.40581162 | 8.70E-05 | 0.29361577 | 0.20753715 |
| hsa-miR-6857-5p  | 6 | 3.54074816 | 6.40E-05 | 0.28242619 | 0.21292049 |
| hsa-miR-223-3p   | 6 | 3.59819639 | 4.36E-05 | 0.27791701 | 0.20786517 |
| hsa-miR-4279     | 6 | 3.59151637 | 7.60E-05 | 0.27843393 | 0.20578231 |
| hsa-miR-4443     | 6 | 3.45323981 | 5.87E-05 | 0.28958313 | 0.20337478 |
| hsa-miR-193a-5p  | 6 | 3.48997996 | 6.00E-05 | 0.2865346  | 0.21428571 |
| hsa-miR-4528     | 6 | 3.43052772 | 8.43E-05 | 0.29150034 | 0.21171171 |
| hsa-miR-4786-5p  | 6 | 3.5        | 6.91E-05 | 0.28571429 | 0.20515395 |
| hsa-miR-500b-5p  | 6 | 3.57080828 | 3.55E-05 | 0.28004864 | 0.20389171 |
| hsa-miR-23a-5p   | 6 | 3.55143621 | 5.62E-05 | 0.28157622 | 0.20606777 |
| hsa-miR-3614-5p  | 6 | 3.5741483  | 4.78E-05 | 0.27978694 | 0.192827   |

|                  |   |            |          |            |            |
|------------------|---|------------|----------|------------|------------|
| hsa-miR-6764-5p  | 6 | 3.53941216 | 1.06E-04 | 0.28253279 | 0.20526696 |
| hsa-miR-7113-5p  | 6 | 3.55210421 | 8.92E-05 | 0.28152327 | 0.2        |
| hsa-miR-3180     | 6 | 3.62090848 | 6.24E-05 | 0.27617378 | 0.20808383 |
| hsa-miR-6816-5p  | 6 | 3.62090848 | 6.24E-05 | 0.27617378 | 0.20808383 |
| hsa-miR-663a     | 6 | 3.56813627 | 8.65E-05 | 0.28025835 | 0.20310078 |
| hsa-miR-6813-5p  | 6 | 3.40380762 | 9.40E-05 | 0.29378864 | 0.21180556 |
| hsa-miR-6721-5p  | 6 | 3.2989312  | 1.39E-04 | 0.30312848 | 0.21829477 |
| hsa-miR-6085     | 6 | 3.40380762 | 9.40E-05 | 0.29378864 | 0.21180556 |
| hsa-miR-3196     | 6 | 3.62090848 | 6.24E-05 | 0.27617378 | 0.20808383 |
| hsa-miR-7150     | 6 | 3.54408818 | 8.26E-05 | 0.28216002 | 0.21128909 |
| hsa-miR-3180-5p  | 6 | 3.38777555 | 1.30E-04 | 0.29517894 | 0.20591233 |
| hsa-miR-499b-5p  | 6 | 3.58350033 | 6.17E-05 | 0.27905676 | 0.1946533  |
| hsa-miR-362-5p   | 6 | 3.48730795 | 5.52E-05 | 0.28675414 | 0.22813938 |
| hsa-miR-3189-3p  | 6 | 3.33633935 | 1.27E-04 | 0.2997297  | 0.2260929  |
| hsa-miR-509-5p   | 6 | 3.32965932 | 7.37E-05 | 0.30033103 | 0.2281773  |
| hsa-miR-6513-3p  | 6 | 3.50133601 | 1.18E-04 | 0.28560527 | 0.20649264 |
| hsa-miR-3617-5p  | 6 | 3.58416834 | 6.40E-05 | 0.27900475 | 0.20177778 |
| hsa-miR-4773     | 6 | 3.54542418 | 3.92E-05 | 0.2820537  | 0.21103118 |
| IL18 down        | 6 | 3.19706079 | 5.14E-05 | 0.3127873  | 0.28425358 |
| IL1RN down       | 6 | 3.17368069 | 3.72E-05 | 0.31509156 | 0.21666667 |
| hsa-miR-4276     | 6 | 3.48931196 | 5.02E-05 | 0.28658945 | 0.226      |
| KRT78 down       | 6 | 4.2251169  | 9.92E-06 | 0.23667984 | 0.25757576 |
| hsa-miR-4690-3p  | 6 | 3.5995324  | 5.86E-05 | 0.27781386 | 0.18543956 |
| hsa-miR-5685     | 6 | 3.5995324  | 5.86E-05 | 0.27781386 | 0.18543956 |
| LGI3 down        | 6 | 3.61589846 | 3.20E-05 | 0.27655644 | 0.20833333 |
| hsa-miR-6754-5p  | 6 | 3.41649967 | 9.54E-05 | 0.29269723 | 0.2129329  |
| hsa-miR-4270     | 6 | 3.41649967 | 9.54E-05 | 0.29269723 | 0.2129329  |
| hsa-miR-4441     | 6 | 3.41649967 | 9.54E-05 | 0.29269723 | 0.2129329  |
| hsa-miR-3074-5p  | 6 | 3.44321977 | 5.92E-05 | 0.29042584 | 0.20972466 |
| hsa-miR-6866-3p  | 6 | 3.46659987 | 1.40E-04 | 0.2884671  | 0.19758813 |
| hsa-miR-6780b-3p | 6 | 3.40247161 | 9.39E-05 | 0.293904   | 0.20466059 |
| PKIB down        | 6 | 3.17100868 | 1.01E-05 | 0.31535707 | 0.32531194 |
| hsa-miR-4762-3p  | 6 | 3.53607214 | 2.81E-04 | 0.28279966 | 0.19421199 |
| hsa-miR-99b-5p   | 6 | 3.38109552 | 6.58E-05 | 0.29576213 | 0.24054463 |
| hsa-miR-4507     | 6 | 3.52672011 | 6.90E-05 | 0.28354958 | 0.1888412  |
| SH3YL1 down      | 6 | 3.3500334  | 2.90E-05 | 0.29850449 | 0.19025157 |
| SLC6A14 up       | 6 | 3.1503006  | 1.52E-05 | 0.31743003 | 0.23268921 |
| TRAPPC6A down    | 6 | 3.35136941 | 8.71E-05 | 0.29838549 | 0.184      |
| AAMDC down       | 5 | 3.1750167  | 1.42E-05 | 0.31495897 | 0.2679803  |
| hsa-miR-154-3p   | 5 | 3.53473614 | 2.44E-05 | 0.28290655 | 0.24885845 |
| hsa-miR-6892-3p  | 5 | 3.68303273 | 4.35E-05 | 0.27151537 | 0.22039474 |
| hsa-miR-4999-5p  | 5 | 3.48263193 | 5.48E-05 | 0.28713916 | 0.24169742 |
| hsa-miR-873-3p   | 5 | 3.38977956 | 5.78E-05 | 0.29500443 | 0.26500778 |
| hsa-miR-18b-3p   | 5 | 3.63226453 | 2.76E-05 | 0.27531034 | 0.24083045 |
| hsa-miR-5196-3p  | 5 | 3.53473614 | 5.92E-05 | 0.28290655 | 0.23160271 |
| hsa-miR-4314     | 5 | 3.67635271 | 5.09E-05 | 0.27200872 | 0.23150685 |
| hsa-miR-4266     | 5 | 3.3991316  | 8.06E-05 | 0.29419279 | 0.25434439 |



|                  |   |            |          |            |            |
|------------------|---|------------|----------|------------|------------|
| hsa-miR-6794-3p  | 5 | 3.66032064 | 3.02E-05 | 0.27320011 | 0.22124542 |
| hsa-miR-6514-5p  | 5 | 3.54008016 | 3.83E-05 | 0.28247948 | 0.25656109 |
| hsa-miR-5699-5p  | 5 | 3.46125585 | 9.00E-05 | 0.28891248 | 0.22619926 |
| hsa-miR-3656     | 5 | 3.70574482 | 5.01E-05 | 0.26985128 | 0.22682927 |
| hsa-miR-6745     | 5 | 3.48530394 | 7.91E-05 | 0.28691902 | 0.22234848 |
| hsa-miR-3165     | 5 | 3.53607214 | 5.44E-05 | 0.28279966 | 0.25339367 |
| hsa-miR-151b     | 5 | 3.79726119 | 2.81E-05 | 0.2633477  | 0.21212121 |
| hsa-miR-3140-3p  | 5 | 3.64094856 | 5.01E-05 | 0.2746537  | 0.21369048 |
| hsa-miR-1238-3p  | 5 | 3.63760855 | 6.07E-05 | 0.27490589 | 0.22125    |
| hsa-miR-329-5p   | 5 | 3.59084836 | 6.46E-05 | 0.27848572 | 0.21932367 |
| hsa-miR-654-5p   | 5 | 3.51670007 | 2.87E-05 | 0.28435749 | 0.27327586 |
| hsa-miR-5087     | 5 | 3.44455578 | 8.61E-05 | 0.2903132  | 0.23993232 |
| hsa-miR-6780a-3p | 5 | 3.61623246 | 4.32E-05 | 0.27653089 | 0.21839763 |
| hsa-miR-6089     | 5 | 3.54408818 | 5.40E-05 | 0.28216002 | 0.23109049 |
| hsa-miR-5195-3p  | 5 | 3.39712759 | 1.06E-04 | 0.29436634 | 0.23962264 |
| hsa-miR-5582-5p  | 5 | 3.4004676  | 9.94E-05 | 0.2940772  | 0.24336973 |
| hsa-miR-6845-3p  | 5 | 3.60487642 | 7.89E-05 | 0.27740202 | 0.22549575 |
| hsa-miR-3136-5p  | 5 | 3.4512358  | 6.06E-05 | 0.28975128 | 0.24894366 |
| hsa-miR-1255a    | 5 | 3.70307281 | 1.86E-05 | 0.270046   | 0.22681992 |
| hsa-miR-4251     | 5 | 3.53072812 | 6.00E-05 | 0.2832277  | 0.22863071 |
| hsa-miR-129-1-3p | 5 | 3.59084836 | 5.99E-05 | 0.27848572 | 0.23693931 |
| hsa-miR-4668-3p  | 5 | 3.46259185 | 6.95E-05 | 0.288801   | 0.24184397 |
| hsa-miR-924      | 5 | 3.43453574 | 5.98E-05 | 0.29116017 | 0.24528302 |
| hsa-miR-8063     | 5 | 3.46593186 | 1.06E-04 | 0.28852269 | 0.23258232 |
| hsa-miR-6865-3p  | 5 | 3.55611222 | 6.87E-05 | 0.28120597 | 0.22600897 |
| hsa-miR-6784-3p  | 5 | 3.52271209 | 5.52E-05 | 0.28387219 | 0.23706897 |
| hsa-miR-5088-5p  | 5 | 3.54141617 | 4.87E-05 | 0.28237291 | 0.23529412 |
| hsa-miR-8065     | 5 | 3.53006012 | 5.52E-05 | 0.28328129 | 0.23230088 |
| hsa-miR-6862-3p  | 5 | 3.52271209 | 5.52E-05 | 0.28387219 | 0.23706897 |
| hsa-miR-2116-3p  | 5 | 3.31897128 | 1.80E-04 | 0.30129818 | 0.25389696 |
| hsa-miR-4646-5p  | 5 | 3.41315965 | 8.09E-05 | 0.29298366 | 0.23642072 |
| hsa-miR-4448     | 5 | 3.48597194 | 6.86E-05 | 0.28686404 | 0.24329502 |
| hsa-miR-218-1-3p | 5 | 3.53340013 | 3.50E-05 | 0.28301352 | 0.25381166 |
| hsa-miR-3679-3p  | 5 | 3.63293253 | 4.08E-05 | 0.27525972 | 0.22619808 |
| hsa-miR-4473     | 5 | 3.55678023 | 2.44E-05 | 0.28115316 | 0.24164649 |
| hsa-miR-3156-3p  | 5 | 3.49131597 | 7.45E-05 | 0.28642495 | 0.22656827 |
| hsa-miR-3658     | 5 | 3.49398798 | 3.35E-05 | 0.28620591 | 0.25588822 |
| hsa-miR-7109-5p  | 5 | 3.65230461 | 2.94E-05 | 0.27379973 | 0.22693603 |
| hsa-miR-95-5p    | 5 | 3.61022044 | 3.12E-05 | 0.2769914  | 0.23857567 |
| hsa-miR-15b-3p   | 5 | 3.54809619 | 2.00E-05 | 0.28184129 | 0.26198547 |
| hsa-miR-490-5p   | 5 | 3.35971944 | 1.33E-04 | 0.2976439  | 0.24804631 |
| hsa-miR-155-3p   | 5 | 3.39645959 | 5.03E-05 | 0.29442423 | 0.27241379 |
| hsa-miR-3152-5p  | 5 | 3.6496326  | 5.79E-05 | 0.27400018 | 0.2239726  |
| hsa-miR-4755-3p  | 5 | 3.43720775 | 1.44E-04 | 0.29093383 | 0.24200323 |
| hsa-miR-6829-3p  | 5 | 3.74248497 | 5.20E-05 | 0.26720214 | 0.22883721 |
| hsa-miR-3616-3p  | 5 | 3.67301269 | 3.28E-05 | 0.27225607 | 0.23692308 |
| hsa-miR-6791-3p  | 5 | 3.74248497 | 5.20E-05 | 0.26720214 | 0.22883721 |

|                  |   |            |          |            |            |
|------------------|---|------------|----------|------------|------------|
| hsa-miR-5583-3p  | 5 | 3.65698063 | 1.34E-04 | 0.27344963 | 0.22789116 |
| hsa-miR-224-3p   | 5 | 3.32832331 | 1.13E-04 | 0.30045158 | 0.23951286 |
| hsa-miR-1185-5p  | 5 | 3.61623246 | 3.98E-05 | 0.27653089 | 0.23055556 |
| hsa-miR-4789-5p  | 5 | 3.72244489 | 1.68E-05 | 0.26864065 | 0.24093023 |
| hsa-miR-6828-5p  | 5 | 3.68770875 | 2.26E-05 | 0.27117109 | 0.22406639 |
| hsa-miR-646      | 5 | 3.38109552 | 6.36E-05 | 0.29576213 | 0.25884146 |
| hsa-miR-2113     | 5 | 3.49064796 | 1.01E-04 | 0.28647976 | 0.23897638 |
| hsa-miR-1248     | 5 | 3.65764863 | 2.30E-05 | 0.27339969 | 0.23024055 |
| hsa-miR-26a-2-3p | 5 | 3.43119572 | 4.36E-05 | 0.29144359 | 0.24939551 |
| hsa-miR-1323     | 5 | 3.49532398 | 5.12E-05 | 0.28609651 | 0.21979798 |
| hsa-miR-26a-1-3p | 5 | 3.43119572 | 4.36E-05 | 0.29144359 | 0.24939551 |
| hsa-miR-635      | 5 | 3.6743487  | 2.51E-05 | 0.27215708 | 0.2234375  |
| hsa-miR-106a-3p  | 5 | 3.45791583 | 7.94E-05 | 0.28919154 | 0.24216216 |
| hsa-miR-644a     | 5 | 3.43453574 | 8.26E-05 | 0.29116017 | 0.24190801 |
| hsa-miR-510-3p   | 5 | 3.46058784 | 4.79E-05 | 0.28896825 | 0.25255474 |
| hsa-miR-499a-5p  | 5 | 3.65764863 | 3.09E-05 | 0.27339969 | 0.23709091 |
| hsa-miR-5581-3p  | 5 | 3.42251169 | 6.19E-05 | 0.29218308 | 0.23894389 |
| hsa-miR-5571-5p  | 5 | 3.5507682  | 3.73E-05 | 0.2816292  | 0.23775281 |
| hsa-miR-1273d    | 5 | 3.499332   | 2.53E-05 | 0.28576883 | 0.24547284 |
| hsa-miR-5089-5p  | 5 | 3.40981964 | 9.98E-05 | 0.29327064 | 0.23547881 |
| hsa-miR-5589-5p  | 5 | 3.38376754 | 5.57E-05 | 0.29552858 | 0.27166922 |
| hsa-miR-4685-5p  | 5 | 3.76386106 | 3.36E-05 | 0.26568462 | 0.21555556 |
| hsa-miR-1236-5p  | 5 | 3.35771543 | 9.87E-05 | 0.29782155 | 0.24403409 |
| hsa-miR-6837-5p  | 5 | 3.76386106 | 3.36E-05 | 0.26568462 | 0.21555556 |
| hsa-miR-548as-3p | 5 | 3.39779559 | 7.00E-05 | 0.29430846 | 0.24461778 |
| hsa-miR-4700-3p  | 5 | 3.47661991 | 4.42E-05 | 0.2876357  | 0.23598485 |
| hsa-miR-6765-5p  | 5 | 3.6503006  | 4.26E-05 | 0.27395004 | 0.23086817 |
| hsa-miR-6728-3p  | 5 | 3.71910488 | 3.75E-05 | 0.2688819  | 0.21944444 |
| hsa-miR-1825     | 5 | 3.61289245 | 1.30E-05 | 0.27678654 | 0.25329341 |
| hsa-miR-3663-5p  | 5 | 3.49331997 | 7.60E-05 | 0.28626064 | 0.24007634 |
| hsa-miR-369-3p   | 5 | 3.24215097 | 1.06E-04 | 0.30843721 | 0.27409988 |
| hsa-miR-6500-3p  | 5 | 3.48263193 | 3.61E-05 | 0.28713916 | 0.23647059 |
| hsa-miR-5692b    | 5 | 3.34635939 | 1.07E-04 | 0.29883222 | 0.26195191 |
| hsa-miR-4524b-5p | 5 | 3.36706747 | 7.10E-05 | 0.29699435 | 0.26303387 |
| hsa-miR-625-3p   | 5 | 3.37374749 | 7.35E-05 | 0.2964063  | 0.24917044 |
| hsa-miR-5692c    | 5 | 3.34635939 | 1.07E-04 | 0.29883222 | 0.26195191 |
| hsa-miR-8069     | 5 | 3.26820307 | 1.72E-04 | 0.30597854 | 0.26180049 |
| hsa-miR-5001-5p  | 5 | 3.61356045 | 4.50E-05 | 0.27673537 | 0.24345404 |
| hsa-miR-4795-5p  | 5 | 3.3997996  | 1.11E-04 | 0.29413498 | 0.24647676 |
| hsa-miR-4693-3p  | 5 | 3.47995992 | 4.65E-05 | 0.28735963 | 0.2370229  |
| hsa-miR-762      | 5 | 3.61356045 | 4.50E-05 | 0.27673537 | 0.24345404 |
| hsa-miR-4492     | 5 | 3.61356045 | 4.50E-05 | 0.27673537 | 0.24345404 |
| hsa-miR-4498     | 5 | 3.61356045 | 4.50E-05 | 0.27673537 | 0.24345404 |
| hsa-miR-3688-3p  | 5 | 3.64562458 | 4.49E-05 | 0.27430142 | 0.22237288 |
| hsa-miR-642b-3p  | 5 | 3.46526386 | 5.15E-05 | 0.28857831 | 0.24103512 |
| hsa-miR-6804-5p  | 5 | 3.48797595 | 2.12E-04 | 0.28669922 | 0.22885375 |
| hsa-miR-892c-5p  | 5 | 3.44856379 | 1.07E-04 | 0.28997579 | 0.22442244 |

|                  |   |            |          |            |            |
|------------------|---|------------|----------|------------|------------|
| hsa-miR-4695-3p  | 5 | 3.53206413 | 6.77E-05 | 0.28312057 | 0.22647059 |
| hsa-miR-6793-3p  | 5 | 3.55210421 | 6.02E-05 | 0.28152327 | 0.23916084 |
| hsa-miR-4703-5p  | 5 | 3.65564462 | 5.06E-05 | 0.27354957 | 0.22160279 |
| hsa-miR-3942-5p  | 5 | 3.65564462 | 5.06E-05 | 0.27354957 | 0.22160279 |
| hsa-miR-4264     | 5 | 3.54342017 | 5.32E-05 | 0.28221322 | 0.23589744 |
| hsa-miR-3191-3p  | 5 | 3.51736807 | 5.57E-05 | 0.28430348 | 0.24505263 |
| hsa-miR-631      | 5 | 3.51670007 | 6.35E-05 | 0.28435749 | 0.24212766 |
| hsa-miR-4652-5p  | 5 | 3.51736807 | 5.57E-05 | 0.28430348 | 0.24505263 |
| hsa-miR-624-5p   | 5 | 3.61088844 | 1.79E-05 | 0.27694015 | 0.26547619 |
| hsa-miR-4650-3p  | 5 | 3.42317969 | 2.42E-04 | 0.29212606 | 0.24597701 |
| hsa-miR-6755-5p  | 5 | 3.7257849  | 1.02E-04 | 0.26839982 | 0.21047619 |
| hsa-let-7i-3p    | 5 | 3.41182365 | 5.07E-05 | 0.29309838 | 0.24983923 |
| hsa-miR-6729-3p  | 5 | 3.7010688  | 3.51E-05 | 0.27019222 | 0.21930502 |
| hsa-miR-6809-3p  | 5 | 3.5741483  | 8.71E-05 | 0.27978694 | 0.24069479 |
| hsa-miR-4766-3p  | 5 | 3.55410822 | 2.91E-05 | 0.28136453 | 0.2601432  |
| hsa-miR-802      | 5 | 3.4245157  | 3.47E-05 | 0.29201209 | 0.24974958 |
| hsa-miR-1233-5p  | 5 | 3.63894456 | 4.07E-05 | 0.27480496 | 0.25823529 |
| hsa-miR-3529-3p  | 5 | 3.51603206 | 4.11E-05 | 0.28441151 | 0.24161616 |
| hsa-miR-6778-5p  | 5 | 3.63894456 | 4.07E-05 | 0.27480496 | 0.25823529 |
| hsa-miR-4287     | 5 | 3.62959252 | 2.91E-05 | 0.27551302 | 0.23897764 |
| ECM1 down        | 5 | 3.23914496 | 1.33E-05 | 0.30872345 | 0.23068182 |
| hsa-miR-99a-3p   | 5 | 3.66566466 | 5.29E-05 | 0.27280182 | 0.22424242 |
| hsa-miR-6839-3p  | 5 | 3.53006012 | 3.69E-05 | 0.28328129 | 0.22462203 |
| hsa-miR-6870-3p  | 5 | 3.58283233 | 3.90E-05 | 0.27910879 | 0.23010204 |
| hsa-miR-4433b-3p | 5 | 3.43921176 | 8.67E-05 | 0.2907643  | 0.23288136 |
| hsa-miR-3663-3p  | 5 | 3.54342017 | 6.00E-05 | 0.28221322 | 0.2276644  |
| hsa-miR-4674     | 5 | 3.50400802 | 6.25E-05 | 0.28538747 | 0.22186235 |
| hsa-miR-6727-3p  | 5 | 3.57348029 | 3.78E-05 | 0.27983924 | 0.25326877 |
| hsa-miR-6747-3p  | 5 | 3.57348029 | 3.78E-05 | 0.27983924 | 0.25326877 |
| hsa-miR-4722-3p  | 5 | 3.57348029 | 3.78E-05 | 0.27983924 | 0.25326877 |
| hsa-miR-3937     | 5 | 3.53406814 | 6.52E-05 | 0.28296002 | 0.22745098 |
| hsa-miR-4265     | 5 | 3.55210421 | 6.27E-05 | 0.28152327 | 0.23627685 |
| hsa-miR-6868-3p  | 5 | 3.75651303 | 1.69E-05 | 0.26620432 | 0.22613636 |
| hsa-miR-1237-3p  | 5 | 3.50200401 | 5.21E-05 | 0.28555079 | 0.23313131 |
| hsa-miR-4536-5p  | 5 | 3.52805611 | 4.82E-05 | 0.2834422  | 0.2356044  |
| hsa-miR-19b-2-5p | 5 | 3.56813627 | 2.47E-05 | 0.28025835 | 0.25012407 |
| hsa-miR-770-5p   | 5 | 3.55878424 | 8.60E-05 | 0.28099484 | 0.25083135 |
| hsa-miR-4505     | 5 | 3.59418838 | 4.96E-05 | 0.27822693 | 0.24384236 |
| hsa-miR-4283     | 5 | 3.62358049 | 4.30E-05 | 0.27597014 | 0.2280597  |
| hsa-miR-4749-5p  | 5 | 3.61690047 | 6.54E-05 | 0.27647982 | 0.22971429 |
| hsa-miR-4706     | 5 | 3.61690047 | 6.54E-05 | 0.27647982 | 0.22971429 |
| hsa-miR-5787     | 5 | 3.59418838 | 4.96E-05 | 0.27822693 | 0.24384236 |
| hsa-miR-6787-5p  | 5 | 3.67368069 | 5.00E-05 | 0.27220656 | 0.23486842 |
| hsa-miR-4769-5p  | 5 | 3.52338009 | 6.42E-05 | 0.28381837 | 0.23119658 |
| hsa-miR-4654     | 5 | 3.52338009 | 6.42E-05 | 0.28381837 | 0.23119658 |
| hsa-miR-3671     | 5 | 3.45791583 | 1.50E-04 | 0.28919154 | 0.22638146 |
| hsa-miR-7847-3p  | 5 | 3.38309953 | 9.24E-05 | 0.29558693 | 0.24119403 |

|                 |   |            |          |            |            |
|-----------------|---|------------|----------|------------|------------|
| hsa-miR-6880-5p | 5 | 3.42251169 | 7.29E-05 | 0.29218308 | 0.24983713 |
| hsa-miR-4262    | 5 | 3.6255845  | 2.81E-05 | 0.2758176  | 0.24925816 |
| hsa-miR-1205    | 5 | 3.41048764 | 7.19E-05 | 0.2932132  | 0.24772727 |
| hsa-miR-6783-5p | 5 | 3.57882432 | 3.94E-05 | 0.27942137 | 0.24145078 |
| hsa-miR-6773-3p | 5 | 3.69505678 | 5.24E-05 | 0.27063184 | 0.21755725 |
| hsa-miR-764     | 5 | 3.46927188 | 1.03E-04 | 0.28824492 | 0.24156306 |
| hsa-miR-146a-3p | 5 | 3.50400802 | 1.01E-04 | 0.28538747 | 0.22891566 |
| hsa-miR-5703    | 5 | 3.44054776 | 6.04E-05 | 0.29065139 | 0.24591304 |
| hsa-miR-4516    | 5 | 3.44054776 | 6.04E-05 | 0.29065139 | 0.24591304 |
| hsa-miR-4434    | 5 | 3.44054776 | 6.04E-05 | 0.29065139 | 0.24591304 |
| hsa-miR-617     | 5 | 3.63426854 | 3.63E-05 | 0.27515853 | 0.23181818 |
| hsa-miR-425-3p  | 5 | 3.49265197 | 8.88E-05 | 0.28631539 | 0.25203252 |
| hsa-miR-652-5p  | 5 | 3.70173681 | 4.69E-05 | 0.27014346 | 0.22918455 |
| ISLR down       | 5 | 3.4248497  | 5.05E-06 | 0.29198362 | 0.425      |
| hsa-miR-4305    | 5 | 3.48463594 | 8.05E-05 | 0.28697402 | 0.24285714 |
| hsa-miR-506-5p  | 5 | 3.35704743 | 1.05E-04 | 0.29788081 | 0.25       |
| hsa-miR-5585-3p | 5 | 3.57348029 | 2.40E-05 | 0.27983924 | 0.24910486 |
| hsa-miR-4474-3p | 5 | 3.48263193 | 6.75E-05 | 0.28713916 | 0.24689922 |
| hsa-miR-6761-5p | 5 | 3.46793587 | 5.52E-05 | 0.28835597 | 0.23222222 |
| hsa-miR-4447    | 5 | 3.66366065 | 3.55E-05 | 0.27295104 | 0.24309764 |
| hsa-miR-4472    | 5 | 3.66366065 | 3.55E-05 | 0.27295104 | 0.24309764 |
| hsa-miR-219b-3p | 5 | 3.66900468 | 2.63E-05 | 0.27255348 | 0.2381295  |
| hsa-miR-5586-3p | 5 | 3.39378758 | 6.69E-05 | 0.29465604 | 0.24653313 |
| POLB up         | 5 | 3.24782899 | 1.02E-05 | 0.30789798 | 0.24054054 |
| hsa-miR-4764-5p | 5 | 3.36105544 | 7.74E-05 | 0.29752559 | 0.25446686 |
| PTHLH up        | 5 | 3.10888444 | 1.19E-05 | 0.32165879 | 0.28744589 |
| hsa-miR-520f-3p | 5 | 3.48931196 | 4.45E-05 | 0.28658945 | 0.25833333 |
| SLC16A2 down    | 5 | 3.2244489  | 1.48E-05 | 0.31013052 | 0.25798817 |
| SLC31A2 down    | 5 | 3.22645291 | 6.27E-06 | 0.30993789 | 0.3075     |
| hsa-miR-658     | 4 | 3.70574482 | 2.59E-05 | 0.26985128 | 0.27631579 |
| hsa-miR-1180-3p | 4 | 3.5260521  | 1.61E-05 | 0.2836033  | 0.33218391 |
| hsa-miR-3115    | 4 | 3.66032064 | 7.97E-06 | 0.27320011 | 0.28832753 |
| hsa-miR-125b    | 4 | 3.71042084 | 8.75E-06 | 0.26951121 | 0.2815534  |
| hsa-miR-4793-5p | 4 | 3.64562458 | 1.59E-05 | 0.27430142 | 0.28852201 |
| hsa-miR-95-3p   | 4 | 3.50668003 | 6.01E-05 | 0.28517002 | 0.2877551  |
| hsa-miR-8082    | 4 | 3.61289245 | 2.32E-05 | 0.27678654 | 0.30981183 |
| hsa-miR-3149    | 4 | 3.64094856 | 2.12E-05 | 0.2746537  | 0.27306548 |
| hsa-miR-5689    | 4 | 3.53740815 | 6.61E-05 | 0.28269285 | 0.28249476 |
| hsa-miR-1272    | 4 | 3.71643287 | 2.12E-05 | 0.26907522 | 0.26184834 |
| hsa-miR-1250-3p | 4 | 3.57682031 | 3.09E-05 | 0.27957793 | 0.285      |
| hsa-miR-365b-5p | 4 | 3.66766867 | 2.88E-05 | 0.27265276 | 0.27739726 |
| hsa-miR-300     | 4 | 3.55878424 | 2.26E-05 | 0.28099484 | 0.30434783 |
| hsa-miR-4758-3p | 4 | 3.54208417 | 3.65E-05 | 0.28231966 | 0.27207506 |
| hsa-miR-3189-5p | 4 | 3.54208417 | 3.65E-05 | 0.28231966 | 0.27207506 |
| hsa-miR-6805-5p | 4 | 3.78189713 | 2.00E-05 | 0.26441756 | 0.27736318 |
| hsa-miR-4670-3p | 4 | 3.63226453 | 3.07E-05 | 0.27531034 | 0.27229299 |
| hsa-miR-660-5p  | 4 | 3.57949232 | 1.96E-05 | 0.27936923 | 0.30385638 |

|                  |   |            |          |            |            |
|------------------|---|------------|----------|------------|------------|
| hsa-miR-4748     | 4 | 3.3496994  | 6.71E-05 | 0.29853425 | 0.31214286 |
| hsa-miR-3177-5p  | 4 | 3.64228457 | 2.41E-05 | 0.27455296 | 0.27981651 |
| hsa-miR-4464     | 4 | 3.3496994  | 6.71E-05 | 0.29853425 | 0.31214286 |
| hsa-miR-3975     | 4 | 3.36506346 | 7.58E-05 | 0.29717122 | 0.29522431 |
| hsa-miR-6509-5p  | 4 | 3.48597194 | 4.56E-05 | 0.28686404 | 0.28367159 |
| hsa-miR-655-3p   | 4 | 3.55277221 | 4.52E-05 | 0.28147034 | 0.28089245 |
| hsa-miR-938      | 4 | 3.66900468 | 1.87E-05 | 0.27255348 | 0.28220339 |
| hsa-miR-7850-5p  | 4 | 3.59352037 | 4.38E-05 | 0.27827865 | 0.26938503 |
| hsa-miR-380-3p   | 4 | 3.54809619 | 3.41E-05 | 0.28184129 | 0.29232506 |
| hsa-miR-3188     | 4 | 3.46593186 | 6.00E-05 | 0.28852269 | 0.28415301 |
| hsa-miR-1470     | 4 | 3.63827655 | 3.32E-05 | 0.27485541 | 0.2829582  |
| hsa-miR-3942-3p  | 4 | 3.52204409 | 4.84E-05 | 0.28392603 | 0.28678038 |
| hsa-miR-6733-3p  | 4 | 3.45457582 | 4.49E-05 | 0.28947114 | 0.32437276 |
| hsa-miR-4794     | 4 | 3.58884436 | 2.56E-05 | 0.27864123 | 0.29495913 |
| hsa-miR-648      | 4 | 3.5741483  | 2.67E-05 | 0.27978694 | 0.31089744 |
| hsa-miR-4439     | 4 | 3.48663995 | 4.32E-05 | 0.28680908 | 0.29158607 |
| hsa-miR-3940-3p  | 4 | 3.62892452 | 4.59E-05 | 0.27556374 | 0.28515625 |
| hsa-miR-4468     | 4 | 3.60821643 | 4.07E-05 | 0.27714524 | 0.27661064 |
| hsa-miR-3714     | 4 | 3.40180361 | 6.35E-05 | 0.29396171 | 0.29778287 |
| hsa-miR-302b-5p  | 4 | 3.56680027 | 5.08E-05 | 0.28036333 | 0.28289474 |
| hsa-miR-3183     | 4 | 3.72912492 | 2.88E-05 | 0.26815943 | 0.27578475 |
| hsa-miR-3160-5p  | 4 | 3.41583166 | 4.62E-05 | 0.29275447 | 0.31598361 |
| hsa-miR-4723-3p  | 4 | 3.72912492 | 2.88E-05 | 0.26815943 | 0.27578475 |
| hsa-miR-6769b-3p | 4 | 3.72912492 | 2.88E-05 | 0.26815943 | 0.27578475 |
| hsa-miR-6856-3p  | 4 | 3.70440882 | 2.70E-05 | 0.26994861 | 0.27217742 |
| hsa-miR-1253     | 4 | 3.50334001 | 4.94E-05 | 0.28544189 | 0.27250489 |
| hsa-miR-7704     | 4 | 3.67969272 | 2.33E-05 | 0.27176182 | 0.26930147 |
| hsa-miR-4504     | 4 | 3.67768871 | 1.83E-05 | 0.27190991 | 0.29135338 |
| hsa-miR-205-3p   | 4 | 3.66098864 | 5.25E-05 | 0.27315026 | 0.25932203 |
| hsa-miR-8084     | 4 | 3.53072812 | 4.58E-05 | 0.2832277  | 0.29368421 |
| hsa-miR-539-3p   | 4 | 3.57080828 | 2.64E-05 | 0.28004864 | 0.29345088 |
| hsa-miR-187-5p   | 4 | 3.66967268 | 1.45E-04 | 0.27250387 | 0.28571429 |
| hsa-miR-6848-3p  | 4 | 3.53473614 | 3.17E-05 | 0.28290655 | 0.27429806 |
| hsa-miR-6878-3p  | 4 | 3.63493654 | 3.19E-05 | 0.27510797 | 0.28895184 |
| hsa-miR-6843-3p  | 4 | 3.53473614 | 3.17E-05 | 0.28290655 | 0.27429806 |
| hsa-miR-1324     | 4 | 3.74048096 | 2.06E-05 | 0.2673453  | 0.26941748 |
| hsa-miR-3591-5p  | 4 | 3.74649299 | 1.25E-05 | 0.26691629 | 0.27763158 |
| hsa-miR-6753-5p  | 4 | 3.47728791 | 4.54E-05 | 0.28758044 | 0.28977273 |
| hsa-miR-1911-3p  | 4 | 3.4759519  | 3.21E-05 | 0.28769098 | 0.28853383 |
| hsa-miR-3677-5p  | 4 | 3.43987976 | 4.73E-05 | 0.29070784 | 0.29868421 |
| hsa-miR-4782-5p  | 4 | 3.38443554 | 5.95E-05 | 0.29547025 | 0.30645161 |
| hsa-miR-6748-3p  | 4 | 3.50801603 | 5.26E-05 | 0.28506141 | 0.27744511 |
| hsa-miR-4774-3p  | 4 | 3.65764863 | 3.52E-05 | 0.27339969 | 0.27758007 |
| hsa-miR-4421     | 4 | 3.7257849  | 3.12E-05 | 0.26839982 | 0.26847826 |
| hsa-miR-5706     | 4 | 3.38443554 | 5.95E-05 | 0.29547025 | 0.30645161 |
| hsa-miR-3167     | 4 | 3.53340013 | 5.31E-05 | 0.28301352 | 0.28076923 |
| hsa-miR-7152-5p  | 4 | 3.69572478 | 1.34E-05 | 0.27058292 | 0.29042553 |

|                  |   |            |          |            |            |
|------------------|---|------------|----------|------------|------------|
| hsa-miR-578      | 4 | 3.67368069 | 1.35E-05 | 0.27220656 | 0.28388278 |
| hsa-miR-6811-5p  | 4 | 3.60287241 | 5.48E-05 | 0.27755632 | 0.26558442 |
| hsa-miR-4781-5p  | 4 | 3.62959252 | 4.57E-05 | 0.27551302 | 0.26224784 |
| hsa-miR-6511b-5p | 4 | 3.60287241 | 5.48E-05 | 0.27755632 | 0.26558442 |
| BBOX1 down       | 4 | 4.09686039 | 9.73E-06 | 0.24408935 | 0.26470588 |
| hsa-miR-4477a    | 4 | 3.72110888 | 8.55E-05 | 0.2687371  | 0.27057613 |
| hsa-miR-6885-5p  | 4 | 3.8239813  | 8.95E-06 | 0.26150756 | 0.29318182 |
| hsa-miR-328-5p   | 4 | 3.8239813  | 8.95E-06 | 0.26150756 | 0.29318182 |
| hsa-miR-522-3p   | 4 | 3.5501002  | 4.71E-05 | 0.28168219 | 0.27483444 |
| hsa-miR-4694-3p  | 4 | 3.47327989 | 4.97E-05 | 0.2879123  | 0.27783019 |
| hsa-miR-580-5p   | 4 | 3.5988644  | 1.56E-05 | 0.27786543 | 0.28928571 |
| hsa-miR-3650     | 4 | 3.77722111 | 3.18E-05 | 0.26474489 | 0.255      |
| hsa-miR-127-3p   | 4 | 3.58016032 | 1.48E-05 | 0.2793171  | 0.29745989 |
| hsa-miR-6511a-3p | 4 | 3.68503674 | 1.63E-05 | 0.27136772 | 0.28958333 |
| hsa-miR-6792-5p  | 4 | 3.53139613 | 4.26E-05 | 0.28317412 | 0.28363229 |
| hsa-miR-1247-3p  | 4 | 3.63026052 | 6.47E-05 | 0.27546232 | 0.27852853 |
| hsa-miR-3622a-3p | 4 | 3.53540414 | 2.77E-05 | 0.28285309 | 0.29382022 |
| hsa-miR-6511b-3p | 4 | 3.68503674 | 1.63E-05 | 0.27136772 | 0.28958333 |
| hsa-miR-4778-3p  | 4 | 3.69438878 | 1.30E-05 | 0.27068077 | 0.2877551  |
| hsa-miR-3681-5p  | 4 | 3.50467602 | 6.99E-05 | 0.28533308 | 0.28967495 |
| hsa-miR-4688     | 4 | 3.62358049 | 3.22E-05 | 0.27597014 | 0.29255319 |
| hsa-miR-6849-5p  | 4 | 3.50467602 | 6.99E-05 | 0.28533308 | 0.28967495 |
| hsa-miR-2682-3p  | 4 | 3.80126921 | 1.53E-05 | 0.26307003 | 0.27639752 |
| hsa-miR-6743-5p  | 4 | 3.62358049 | 3.22E-05 | 0.27597014 | 0.29255319 |
| hsa-miR-6781-3p  | 4 | 3.80126921 | 1.53E-05 | 0.26307003 | 0.27639752 |
| hsa-miR-6877-3p  | 4 | 3.7237809  | 4.20E-05 | 0.26854426 | 0.26556017 |
| hsa-miR-7109-3p  | 4 | 3.54141617 | 2.90E-05 | 0.28237291 | 0.28444444 |
| hsa-miR-4727-5p  | 4 | 3.7745491  | 3.84E-05 | 0.26493231 | 0.26891892 |
| hsa-miR-6738-3p  | 4 | 3.7745491  | 3.84E-05 | 0.26493231 | 0.26891892 |
| hsa-miR-4790-3p  | 4 | 3.56279225 | 2.46E-05 | 0.28067873 | 0.28802993 |
| hsa-miR-3159     | 4 | 3.51202405 | 5.12E-05 | 0.28473609 | 0.28669276 |
| hsa-miR-503-3p   | 4 | 3.54275217 | 3.05E-05 | 0.28226643 | 0.27783613 |
| hsa-miR-6871-5p  | 4 | 3.54074816 | 2.12E-05 | 0.28242619 | 0.29256466 |
| hsa-miR-6861-5p  | 4 | 3.56947228 | 5.42E-05 | 0.28015346 | 0.27448747 |
| hsa-miR-1273h-3p | 4 | 3.43520374 | 5.36E-05 | 0.29110355 | 0.30390492 |
| hsa-miR-3680-3p  | 4 | 3.71910488 | 3.93E-05 | 0.2688819  | 0.27031802 |
| hsa-miR-638      | 4 | 3.48663995 | 3.65E-05 | 0.28680908 | 0.29046243 |
| hsa-miR-450b-3p  | 4 | 3.42184369 | 4.15E-05 | 0.29224012 | 0.31125828 |
| hsa-miR-653-3p   | 4 | 3.42050768 | 5.05E-05 | 0.29235426 | 0.29785479 |
| hsa-miR-708-3p   | 4 | 3.65297261 | 1.82E-05 | 0.27374966 | 0.29371166 |
| hsa-miR-3116     | 4 | 3.49665999 | 6.76E-05 | 0.2859872  | 0.3083004  |
| hsa-miR-4263     | 4 | 3.43186373 | 8.92E-05 | 0.29138686 | 0.28403361 |
| hsa-miR-1283     | 4 | 3.35370741 | 6.19E-05 | 0.29817747 | 0.31975921 |
| hsa-miR-4252     | 4 | 3.74448898 | 1.51E-05 | 0.26705914 | 0.26712329 |
| hsa-miR-2355-3p  | 4 | 3.57214429 | 2.63E-05 | 0.2799439  | 0.27309469 |
| CALB2 down       | 4 | 3.18303273 | 3.60E-05 | 0.31416579 | 0.30430328 |
| hsa-miR-6814-5p  | 4 | 3.72044088 | 1.08E-04 | 0.26878535 | 0.26104418 |

|                  |   |            |          |            |            |
|------------------|---|------------|----------|------------|------------|
| hsa-miR-1972     | 4 | 3.68637275 | 4.70E-05 | 0.27126937 | 0.26090909 |
| hsa-miR-548at-3p | 4 | 3.59418838 | 2.21E-05 | 0.27822693 | 0.28436658 |
| hsa-miR-548ay-3p | 4 | 3.59418838 | 2.21E-05 | 0.27822693 | 0.28436658 |
| hsa-miR-621      | 4 | 3.60955244 | 2.26E-05 | 0.27704266 | 0.283241   |
| hsa-miR-5197-5p  | 4 | 3.55544422 | 3.24E-05 | 0.28125881 | 0.2947494  |
| hsa-miR-496      | 4 | 3.65831663 | 5.01E-05 | 0.27334977 | 0.26962457 |
| hsa-miR-6809-5p  | 4 | 3.48530394 | 4.85E-05 | 0.28691902 | 0.29190476 |
| hsa-miR-146a     | 4 | 3.77655311 | 6.40E-06 | 0.26479172 | 0.27205882 |
| hsa-miR-6835-3p  | 4 | 3.54809619 | 1.65E-05 | 0.28184129 | 0.28002309 |
| hsa-miR-145      | 4 | 3.70507682 | 1.75E-05 | 0.26989994 | 0.2767094  |
| hsa-miR-518a-3p  | 4 | 3.61289245 | 2.04E-05 | 0.27678654 | 0.29191617 |
| hsa-miR-4709-5p  | 4 | 3.49131597 | 3.51E-05 | 0.28642495 | 0.29182331 |
| hsa-miR-558      | 4 | 3.3757515  | 5.96E-05 | 0.29623034 | 0.30113636 |
| hsa-miR-7703     | 4 | 3.58884436 | 1.50E-05 | 0.27864123 | 0.31233062 |
| hsa-miR-7107-5p  | 4 | 3.46259185 | 3.37E-05 | 0.288801   | 0.30294659 |
| hsa-miR-6794-5p  | 4 | 3.44722779 | 5.41E-05 | 0.29008817 | 0.29117148 |
| hsa-miR-4261     | 4 | 3.51736807 | 2.11E-05 | 0.28430348 | 0.27789934 |
| hsa-miR-216b-3p  | 4 | 3.53473614 | 1.93E-04 | 0.28290655 | 0.27107062 |
| hsa-miR-454-5p   | 4 | 3.30961924 | 6.59E-05 | 0.30214956 | 0.32730263 |
| hsa-miR-548av-5p | 4 | 3.40781563 | 4.41E-05 | 0.2934431  | 0.33131068 |
| hsa-miR-5009-3p  | 4 | 3.44188377 | 1.10E-04 | 0.29053857 | 0.29307432 |
| hsa-miR-6818-5p  | 4 | 3.34235137 | 5.95E-05 | 0.29919057 | 0.33976157 |
| hsa-miR-8068     | 4 | 3.47127589 | 3.95E-05 | 0.28807851 | 0.3115942  |
| hsa-miR-541-5p   | 4 | 3.48663995 | 6.86E-05 | 0.28680908 | 0.27532833 |
| hsa-miR-323a-5p  | 4 | 3.50801603 | 2.15E-05 | 0.28506141 | 0.29279749 |
| hsa-miR-8054     | 4 | 3.40781563 | 4.41E-05 | 0.2934431  | 0.33131068 |
| hsa-miR-4537     | 4 | 3.43653975 | 3.13E-05 | 0.29099038 | 0.30565217 |
| hsa-miR-4716-3p  | 4 | 3.44722779 | 5.41E-05 | 0.29008817 | 0.29117148 |
| hsa-miR-5010-5p  | 4 | 3.73647295 | 1.66E-05 | 0.26763207 | 0.29442149 |
| hsa-miR-4417     | 4 | 3.50935204 | 4.80E-05 | 0.28495289 | 0.29390496 |
| hsa-miR-1298-3p  | 4 | 3.36840347 | 7.26E-05 | 0.29687655 | 0.30600293 |
| hsa-miR-25-5p    | 4 | 3.69305277 | 2.42E-05 | 0.27077869 | 0.28358209 |
| hsa-miR-4656     | 4 | 3.61690047 | 4.29E-05 | 0.27647982 | 0.28223496 |
| hsa-miR-544b     | 4 | 3.53139613 | 5.84E-05 | 0.28317412 | 0.27878465 |
| hsa-miR-6079     | 4 | 3.51736807 | 2.89E-05 | 0.28430348 | 0.28237052 |
| hsa-miR-3158-5p  | 4 | 3.63961256 | 3.00E-05 | 0.27475452 | 0.27795527 |
| hsa-miR-3187-5p  | 4 | 3.72778891 | 3.77E-05 | 0.26825553 | 0.27830189 |
| hsa-miR-3166     | 4 | 3.50400802 | 4.95E-05 | 0.28538747 | 0.28939394 |
| hsa-miR-5189-5p  | 4 | 3.72778891 | 3.77E-05 | 0.26825553 | 0.27830189 |
| hsa-miR-6860     | 4 | 3.72778891 | 3.77E-05 | 0.26825553 | 0.27830189 |
| CNFN down        | 4 | 3.09285237 | 2.62E-05 | 0.32332613 | 0.33623693 |
| hsa-miR-4496     | 4 | 3.78390114 | 1.63E-05 | 0.26427752 | 0.27631579 |
| hsa-miR-7159-5p  | 4 | 3.44722779 | 3.40E-05 | 0.29008817 | 0.30442478 |
| hsa-miR-136-3p   | 4 | 3.59619238 | 3.39E-05 | 0.27807189 | 0.27605634 |
| hsa-miR-1291     | 4 | 3.74716099 | 1.37E-05 | 0.2668687  | 0.28292683 |
| hsa-miR-4451     | 4 | 3.55744823 | 3.74E-05 | 0.28110037 | 0.28867713 |
| hsa-miR-152-5p   | 4 | 3.50267201 | 5.20E-05 | 0.28549633 | 0.28792415 |

|                   |   |            |          |            |            |
|-------------------|---|------------|----------|------------|------------|
| hsa-miR-182-3p    | 4 | 3.77254509 | 1.75E-05 | 0.26507304 | 0.28963415 |
| hsa-miR-195-3p    | 4 | 3.54275217 | 4.89E-05 | 0.28226643 | 0.29130435 |
| hsa-miR-4290      | 4 | 3.53874415 | 2.18E-05 | 0.28258613 | 0.2808296  |
| hsa-miR-4292      | 4 | 3.78657315 | 3.74E-05 | 0.26409103 | 0.26315789 |
| hsa-miR-5093      | 4 | 3.61556446 | 3.13E-05 | 0.27658199 | 0.2845092  |
| hsa-miR-4308      | 4 | 3.82732131 | 2.38E-05 | 0.26127934 | 0.27040816 |
| hsa-miR-6791-5p   | 4 | 3.78657315 | 3.74E-05 | 0.26409103 | 0.26315789 |
| hsa-miR-3690      | 4 | 3.54676019 | 4.27E-05 | 0.28194745 | 0.26749436 |
| hsa-miR-516a-3p   | 4 | 3.76252505 | 2.12E-05 | 0.26577896 | 0.2745098  |
| hsa-miR-202-5p    | 4 | 3.77120908 | 1.82E-05 | 0.26516695 | 0.27095808 |
| hsa-miR-218-2-3p  | 4 | 3.56613226 | 2.27E-05 | 0.28041585 | 0.28580247 |
| hsa-miR-1228-3p   | 4 | 3.67167669 | 6.41E-05 | 0.27235514 | 0.271777   |
| hsa-miR-4502      | 4 | 3.69438878 | 1.95E-05 | 0.27068077 | 0.28251121 |
| DPT down          | 4 | 3.44355377 | 4.13E-06 | 0.29039767 | 0.30120482 |
| hsa-miR-4701-5p   | 4 | 3.57949232 | 8.72E-05 | 0.27936923 | 0.26315789 |
| hsa-miR-6740-3p   | 4 | 3.6503006  | 4.12E-05 | 0.27395004 | 0.26507937 |
| hsa-miR-4428      | 4 | 3.78256513 | 2.28E-05 | 0.26437086 | 0.2607362  |
| hsa-miR-3622a-5p  | 4 | 3.54208417 | 3.91E-05 | 0.28231966 | 0.27134831 |
| hsa-miR-6515-5p   | 4 | 3.49265197 | 2.73E-05 | 0.28631539 | 0.29598826 |
| hsa-miR-3143      | 4 | 3.63827655 | 2.39E-05 | 0.27485541 | 0.28814935 |
| hsa-miR-203a-5p   | 4 | 3.55678023 | 4.52E-05 | 0.28115316 | 0.28932584 |
| hsa-miR-2054      | 4 | 3.38643955 | 5.54E-05 | 0.29529539 | 0.31402439 |
| hsa-miR-3126-3p   | 4 | 3.40781563 | 5.53E-05 | 0.2934431  | 0.3012     |
| hsa-miR-4662a-5p  | 4 | 3.47929192 | 6.10E-05 | 0.2874148  | 0.28001876 |
| FAM221A down      | 4 | 3.250501   | 6.27E-06 | 0.30764488 | 0.33385093 |
| hsa-miR-4647      | 4 | 3.59619238 | 1.15E-04 | 0.27807189 | 0.26236264 |
| hsa-miR-4662b     | 4 | 3.59619238 | 1.15E-04 | 0.27807189 | 0.26236264 |
| hsa-miR-4426      | 4 | 3.59619238 | 1.15E-04 | 0.27807189 | 0.26236264 |
| hsa-miR-409-3p    | 4 | 3.51202405 | 2.43E-05 | 0.28473609 | 0.31751055 |
| hsa-miR-7157-5p   | 4 | 3.39178357 | 7.10E-05 | 0.29483013 | 0.2835131  |
| hsa-miR-4310      | 4 | 3.39178357 | 7.10E-05 | 0.29483013 | 0.2835131  |
| hsa-miR-548v      | 4 | 3.6503006  | 2.90E-05 | 0.27395004 | 0.28571429 |
| hsa-miR-8083      | 4 | 3.51336005 | 5.32E-05 | 0.28462782 | 0.28527607 |
| hsa-miR-4726-5p   | 4 | 3.69772879 | 5.02E-05 | 0.27043627 | 0.27164502 |
| hsa-miR-4640-5p   | 4 | 3.69772879 | 5.02E-05 | 0.27043627 | 0.27164502 |
| hsa-miR-3622b-5p  | 4 | 3.62291249 | 3.69E-05 | 0.27602102 | 0.27627628 |
| hsa-miR-133a-5p   | 4 | 3.64495658 | 4.39E-05 | 0.27435169 | 0.27306548 |
| hsa-miR-6801-5p   | 4 | 3.72645291 | 1.16E-05 | 0.26835171 | 0.26913876 |
| hsa-miR-4489      | 4 | 3.62358049 | 3.37E-05 | 0.27597014 | 0.28450704 |
| hsa-miR-4673      | 4 | 3.55945224 | 5.08E-05 | 0.2809421  | 0.2816092  |
| hsa-miR-184       | 4 | 3.56746827 | 4.40E-05 | 0.28031083 | 0.28056235 |
| hsa-miR-4322      | 4 | 3.41783567 | 6.33E-05 | 0.29258282 | 0.30213465 |
| hsa-miR-513c-3p   | 4 | 3.71442886 | 1.47E-05 | 0.26922039 | 0.27305825 |
| hsa-miR-125b-1-3p | 4 | 3.42050768 | 7.37E-05 | 0.29235426 | 0.28927987 |
| hsa-miR-548m      | 4 | 3.56212425 | 3.21E-05 | 0.28073136 | 0.27328431 |
| hsa-miR-3606-3p   | 4 | 3.71442886 | 1.47E-05 | 0.26922039 | 0.27305825 |
| hsa-miR-513a-3p   | 4 | 3.71442886 | 1.47E-05 | 0.26922039 | 0.27305825 |



|                 |   |            |          |            |            |
|-----------------|---|------------|----------|------------|------------|
| hsa-miR-4513    | 4 | 3.48864395 | 5.31E-05 | 0.28664433 | 0.2901354  |
| hsa-miR-4494    | 4 | 3.83066132 | 1.39E-05 | 0.26105153 | 0.275      |
| hsa-miR-6855-3p | 4 | 3.48864395 | 5.31E-05 | 0.28664433 | 0.2901354  |
| hsa-miR-4424    | 4 | 3.47661991 | 1.17E-04 | 0.2876357  | 0.28429603 |
| hsa-miR-8071    | 4 | 3.50601202 | 4.81E-05 | 0.28522435 | 0.27997967 |
| hsa-miR-6857-3p | 4 | 3.29692719 | 9.32E-05 | 0.30331273 | 0.31447535 |
| hsa-miR-3925-3p | 4 | 3.62090848 | 3.35E-05 | 0.27617378 | 0.28324468 |
| hsa-miR-376a-5p | 4 | 3.64829659 | 1.55E-05 | 0.27410052 | 0.27173913 |
| hsa-miR-1184    | 4 | 3.62892452 | 2.11E-05 | 0.27556374 | 0.27912621 |
| hsa-miR-215-3p  | 4 | 3.79592518 | 2.44E-05 | 0.26344039 | 0.27218935 |
| hsa-miR-3672    | 4 | 3.53740815 | 4.10E-05 | 0.28269285 | 0.29002193 |
| hsa-miR-6864-3p | 4 | 3.53740815 | 4.10E-05 | 0.28269285 | 0.29002193 |
| hsa-miR-4485-5p | 4 | 3.69639279 | 6.11E-05 | 0.27053402 | 0.27385496 |
| hsa-miR-1288-3p | 4 | 3.45323981 | 4.30E-05 | 0.28958313 | 0.3088488  |
| hsa-miR-5190    | 4 | 3.5754843  | 2.41E-05 | 0.27968239 | 0.29253927 |
| hsa-miR-4307    | 4 | 3.54141617 | 4.22E-05 | 0.28237291 | 0.28571429 |
| hsa-miR-4328    | 4 | 3.56613226 | 3.03E-05 | 0.28041585 | 0.29272959 |
| hsa-miR-3190-3p | 4 | 3.44789579 | 4.67E-05 | 0.29003197 | 0.30067568 |
| hsa-miR-135b-3p | 4 | 3.66299265 | 5.70E-06 | 0.27300082 | 0.29395604 |
| hsa-miR-6787-3p | 4 | 3.69572478 | 1.57E-05 | 0.27058292 | 0.28735632 |
| KRT31 down      | 4 | 3.62124248 | 5.09E-06 | 0.27614831 | 0.32986111 |
| hsa-miR-483-5p  | 4 | 3.66098864 | 2.69E-05 | 0.27315026 | 0.2712963  |
| hsa-miR-3913-3p | 4 | 3.57014028 | 2.89E-05 | 0.28010104 | 0.28606965 |
| hsa-miR-649     | 4 | 3.35237141 | 6.18E-05 | 0.2982963  | 0.30414909 |
| hsa-miR-3659    | 4 | 3.36305945 | 7.32E-05 | 0.2973483  | 0.29377713 |
| hsa-miR-3200-5p | 4 | 3.65698063 | 1.36E-05 | 0.27344963 | 0.27857143 |
| hsa-miR-6730-5p | 4 | 3.47327989 | 4.58E-05 | 0.2879123  | 0.28634752 |
| hsa-miR-3688-5p | 4 | 3.53807615 | 2.49E-05 | 0.28263948 | 0.29509132 |
| hsa-miR-4303    | 4 | 3.68169673 | 4.05E-05 | 0.2716139  | 0.26958955 |
| hsa-miR-8079    | 4 | 3.5487642  | 4.59E-05 | 0.28178824 | 0.29230769 |
| hsa-miR-1245a   | 4 | 3.5487642  | 4.59E-05 | 0.28178824 | 0.29230769 |
| hsa-miR-6777-5p | 4 | 3.60487642 | 5.19E-05 | 0.27740202 | 0.26765537 |
| hsa-miR-6889-5p | 4 | 3.60487642 | 5.19E-05 | 0.27740202 | 0.26765537 |
| MAMDC2 down     | 4 | 3.3500334  | 4.13E-06 | 0.29850449 | 0.30454545 |
| hsa-miR-1262    | 4 | 3.61222445 | 1.78E-05 | 0.27683773 | 0.28455882 |
| hsa-miR-6736-5p | 4 | 3.61222445 | 1.78E-05 | 0.27683773 | 0.28455882 |
| hsa-miR-4701-3p | 4 | 3.61222445 | 1.78E-05 | 0.27683773 | 0.28455882 |
| hsa-miR-4725-5p | 4 | 3.46392786 | 5.02E-05 | 0.28868962 | 0.29528986 |
| hsa-miR-6751-3p | 4 | 3.74181697 | 4.05E-05 | 0.26724984 | 0.26309524 |
| hsa-miR-1199-5p | 4 | 3.74181697 | 4.05E-05 | 0.26724984 | 0.26309524 |
| hsa-miR-513c-5p | 4 | 3.3510354  | 3.11E-04 | 0.29841523 | 0.2993007  |
| hsa-miR-6128    | 4 | 3.52738811 | 2.56E-05 | 0.28349588 | 0.28871681 |
| OSR1 down       | 4 | 3.31596526 | 1.68E-05 | 0.30157131 | 0.32438017 |
| hsa-miR-7156-3p | 4 | 3.54141617 | 4.52E-05 | 0.28237291 | 0.29119639 |
| hsa-miR-3976    | 4 | 3.64696059 | 2.40E-05 | 0.27420093 | 0.28267477 |
| PLEKHG6 down    | 4 | 3.21576486 | 6.90E-06 | 0.31096801 | 0.2875     |
| hsa-miR-1537-3p | 4 | 3.53807615 | 3.15E-05 | 0.28263948 | 0.30769231 |

|                    |   |            |          |            |            |
|--------------------|---|------------|----------|------------|------------|
| hsa-miR-3686       | 4 | 3.67835671 | 2.35E-05 | 0.27186053 | 0.28529412 |
| hsa-miR-3606-5p    | 4 | 3.56947228 | 2.62E-05 | 0.28015346 | 0.29052369 |
| hsa-miR-4780       | 4 | 3.49465598 | 3.63E-05 | 0.2861512  | 0.30250929 |
| hsa-miR-7843-3p    | 4 | 3.58216433 | 2.94E-05 | 0.27916084 | 0.28497409 |
| hsa-miR-487b-3p    | 4 | 3.62825651 | 1.51E-05 | 0.27561447 | 0.28303303 |
| SUSD4 down         | 4 | 3.34335337 | 1.69E-06 | 0.2991009  | 0.502      |
| UPK3B down         | 4 | 3.29392118 | 4.50E-06 | 0.30358954 | 0.31395349 |
| ZNF365 down        | 4 | 3.38410154 | 9.73E-06 | 0.29549941 | 0.3125     |
| hsa-miR-139-3p     | 3 | 3.749833   | 7.00E-06 | 0.26667854 | 0.34219858 |
| hsa-miR-1269b      | 3 | 3.56880428 | 1.10E-05 | 0.2802059  | 0.38106603 |
| hsa-miR-409-5p     | 3 | 3.52070808 | 1.38E-05 | 0.28403377 | 0.37571839 |
| hsa-miR-4804-5p    | 3 | 3.66833667 | 2.01E-05 | 0.27260311 | 0.35423926 |
| hsa-miR-1227-3p    | 3 | 3.58750835 | 2.34E-05 | 0.278745   | 0.36642454 |
| hsa-miR-1255b-2-3p | 3 | 3.58684035 | 2.12E-05 | 0.27879691 | 0.35238095 |
| hsa-miR-605-3p     | 3 | 3.71576486 | 1.01E-05 | 0.2691236  | 0.36944444 |
| hsa-miR-8052       | 3 | 3.78256513 | 1.01E-05 | 0.26437086 | 0.35867446 |
| hsa-miR-6514-3p    | 3 | 3.85203741 | 1.72E-05 | 0.25960288 | 0.33834586 |
| hsa-miR-6769b-5p   | 3 | 3.64094856 | 2.32E-05 | 0.2746537  | 0.35576923 |
| hsa-miR-6769a-5p   | 3 | 3.64094856 | 2.32E-05 | 0.2746537  | 0.35576923 |
| hsa-miR-633        | 3 | 3.45323981 | 4.96E-05 | 0.28958313 | 0.37320044 |
| hsa-miR-675-3p     | 3 | 3.62825651 | 1.12E-05 | 0.27561447 | 0.36334405 |
| hsa-miR-3616-5p    | 3 | 3.50467602 | 2.70E-05 | 0.28533308 | 0.36539746 |
| hsa-miR-500b-3p    | 3 | 3.76786907 | 1.79E-05 | 0.265402   | 0.33716475 |
| hsa-miR-921        | 3 | 3.89011356 | 6.72E-04 | 0.2570619  | 0.33615819 |
| AGAP5 down         | 3 | 3.35871743 | 8.90E-07 | 0.2977327  | 0.61419753 |
| hsa-miR-5100       | 3 | 3.58884436 | 2.19E-05 | 0.27864123 | 0.37712243 |
| hsa-miR-4660       | 3 | 3.63092852 | 1.68E-05 | 0.27541165 | 0.38338658 |
| hsa-miR-6818-3p    | 3 | 3.70774883 | 1.07E-05 | 0.26970543 | 0.36       |
| hsa-miR-5585-5p    | 3 | 3.63159653 | 2.96E-05 | 0.27536099 | 0.3598369  |
| hsa-miR-548ao-5p   | 3 | 3.6756847  | 1.36E-05 | 0.27205816 | 0.38521401 |
| hsa-miR-1244       | 3 | 3.79592518 | 1.31E-05 | 0.26344039 | 0.3655914  |
| ALOX12 down        | 3 | 3.499666   | 5.42E-06 | 0.28574155 | 0.36585366 |
| hsa-miR-450a-5p    | 3 | 3.64094856 | 1.33E-05 | 0.2746537  | 0.36803365 |
| hsa-miR-4645-3p    | 3 | 3.67702071 | 1.12E-05 | 0.27195931 | 0.36785714 |
| hsa-miR-135a-3p    | 3 | 3.65430862 | 1.56E-05 | 0.27364957 | 0.37725225 |
| hsa-miR-4446-3p    | 3 | 3.67368069 | 2.27E-05 | 0.27220656 | 0.36092715 |
| hsa-miR-6772-3p    | 3 | 3.65230461 | 1.94E-05 | 0.27379973 | 0.36429309 |
| hsa-miR-4713-5p    | 3 | 3.67635271 | 1.68E-05 | 0.27200872 | 0.3649635  |
| hsa-miR-4732-3p    | 3 | 3.51135605 | 3.11E-05 | 0.28479026 | 0.3780573  |
| hsa-miR-6752-3p    | 3 | 3.94555778 | 1.37E-05 | 0.25344959 | 0.33660131 |
| hsa-miR-3170       | 3 | 3.52672011 | 2.64E-05 | 0.28354958 | 0.36047321 |
| hsa-miR-345-3p     | 3 | 3.71509686 | 2.85E-05 | 0.26917199 | 0.3503268  |
| hsa-miR-4501       | 3 | 3.76720107 | 1.02E-05 | 0.26544906 | 0.37089202 |
| hsa-miR-6855-5p    | 3 | 3.52672011 | 2.64E-05 | 0.28354958 | 0.36047321 |
| hsa-miR-138-1-3p   | 3 | 3.70240481 | 2.85E-06 | 0.27009472 | 0.37369208 |
| ANXA3 down         | 3 | 3.17034068 | 9.54E-06 | 0.31542351 | 0.39719626 |
| hsa-miR-20b-3p     | 3 | 3.69038076 | 1.30E-05 | 0.27097475 | 0.35714286 |

|                  |   |            |          |            |            |
|------------------|---|------------|----------|------------|------------|
| hsa-miR-1199-3p  | 3 | 3.55945224 | 2.16E-05 | 0.2809421  | 0.34971335 |
| hsa-miR-204      | 3 | 3.75851703 | 4.50E-06 | 0.26606238 | 0.3556797  |
| hsa-miR-606      | 3 | 3.48597194 | 1.88E-05 | 0.28686404 | 0.38740458 |
| hsa-miR-6839-5p  | 3 | 3.5741483  | 2.22E-05 | 0.27978694 | 0.36925647 |
| hsa-miR-518f-5p  | 3 | 3.71376086 | 6.35E-06 | 0.26926882 | 0.3836478  |
| hsa-miR-3918     | 3 | 3.80193721 | 2.42E-05 | 0.26302381 | 0.33858268 |
| hsa-miR-154-5p   | 3 | 3.749833   | 1.67E-05 | 0.26667854 | 0.34542314 |
| hsa-miR-520c-5p  | 3 | 3.71376086 | 6.35E-06 | 0.26926882 | 0.3836478  |
| hsa-miR-4721     | 3 | 3.71710087 | 1.32E-05 | 0.26902687 | 0.36111111 |
| hsa-miR-6779-3p  | 3 | 3.65631263 | 3.67E-05 | 0.27349959 | 0.35632184 |
| hsa-miR-518d-5p  | 3 | 3.71376086 | 6.35E-06 | 0.26926882 | 0.3836478  |
| hsa-miR-1914-5p  | 3 | 3.68236473 | 1.22E-05 | 0.27156463 | 0.36817654 |
| hsa-miR-519a-5p  | 3 | 3.71376086 | 6.35E-06 | 0.26926882 | 0.3836478  |
| hsa-miR-526a     | 3 | 3.71376086 | 6.35E-06 | 0.26926882 | 0.3836478  |
| hsa-miR-6834-5p  | 3 | 3.67034068 | 1.71E-05 | 0.27245427 | 0.37090909 |
| hsa-miR-378j     | 3 | 3.5741483  | 2.22E-05 | 0.27978694 | 0.36925647 |
| hsa-miR-1268b    | 3 | 3.83066132 | 1.15E-05 | 0.26105153 | 0.35384615 |
| hsa-miR-1268a    | 3 | 3.83066132 | 1.15E-05 | 0.26105153 | 0.35384615 |
| hsa-miR-7853-5p  | 3 | 3.72712091 | 9.37E-06 | 0.26830361 | 0.35866667 |
| hsa-miR-933      | 3 | 3.78857715 | 7.88E-06 | 0.26395134 | 0.34819533 |
| hsa-miR-636      | 3 | 3.6743487  | 1.36E-05 | 0.27215708 | 0.35521236 |
| hsa-miR-1911-5p  | 3 | 3.60220441 | 2.68E-05 | 0.27760779 | 0.35996327 |
| hsa-miR-4677-3p  | 3 | 3.67234469 | 2.74E-05 | 0.27230559 | 0.34994069 |
| hsa-miR-6765-3p  | 3 | 3.62692051 | 7.55E-05 | 0.275716   | 0.3564257  |
| hsa-miR-4490     | 3 | 3.73714095 | 5.93E-06 | 0.26758423 | 0.34954955 |
| hsa-miR-3622b-3p | 3 | 3.59352037 | 1.36E-05 | 0.27827865 | 0.37086685 |
| hsa-miR-3138     | 3 | 3.86606546 | 9.39E-06 | 0.25866091 | 0.34432234 |
| hsa-miR-221      | 3 | 3.75584502 | 4.48E-06 | 0.26625167 | 0.37037037 |
| hsa-miR-4713-3p  | 3 | 3.51068804 | 1.86E-05 | 0.28484445 | 0.38095238 |
| hsa-miR-6847-3p  | 3 | 3.74248497 | 1.05E-05 | 0.26720214 | 0.3538175  |
| hsa-miR-8064     | 3 | 4.05177021 | 1.41E-05 | 0.2468057  | 0.34408602 |
| hsa-miR-4436b-5p | 3 | 3.87875752 | 2.37E-05 | 0.25781452 | 0.33691756 |
| hsa-miR-3692-3p  | 3 | 3.80594522 | 2.86E-05 | 0.26274682 | 0.34052758 |
| hsa-miR-6509-3p  | 3 | 3.94221777 | 1.42E-05 | 0.25366432 | 0.34285714 |
| hsa-miR-6757-3p  | 3 | 3.80260521 | 2.67E-05 | 0.2629776  | 0.33834586 |
| hsa-miR-4799-5p  | 3 | 3.75450902 | 7.53E-06 | 0.26634641 | 0.35763889 |
| hsa-miR-6894-3p  | 3 | 3.69706079 | 8.28E-06 | 0.27048514 | 0.36603774 |
| hsa-miR-7844-5p  | 3 | 3.83667335 | 4.57E-06 | 0.26064247 | 0.34328358 |
| hsa-miR-5589-3p  | 3 | 3.66299265 | 1.22E-05 | 0.27300082 | 0.3713355  |
| hsa-miR-937-3p   | 3 | 3.73380094 | 8.46E-06 | 0.2678236  | 0.36636637 |
| hsa-miR-1295b-3p | 3 | 3.63961256 | 2.43E-05 | 0.27475452 | 0.35364728 |
| hsa-miR-4661-5p  | 3 | 3.80126921 | 6.27E-06 | 0.26307003 | 0.34825871 |
| hsa-miR-4515     | 3 | 3.57682031 | 1.57E-05 | 0.27957793 | 0.37380952 |
| hsa-miR-3169     | 3 | 3.72912492 | 1.41E-05 | 0.26815943 | 0.35526316 |
| hsa-miR-4719     | 3 | 3.5995324  | 2.89E-05 | 0.27781386 | 0.36936937 |
| hsa-miR-7151-5p  | 3 | 3.81262525 | 2.07E-05 | 0.26228647 | 0.34437086 |
| hsa-miR-382-3p   | 3 | 3.76586506 | 9.07E-06 | 0.26554324 | 0.35619048 |

|                 |   |            |          |            |            |
|-----------------|---|------------|----------|------------|------------|
| hsa-miR-4503    | 3 | 3.68436874 | 1.92E-05 | 0.27141692 | 0.36139169 |
| hsa-miR-585-5p  | 3 | 3.70507682 | 1.34E-05 | 0.26989994 | 0.36601307 |
| CCL19 up        | 3 | 3.25517702 | 1.03E-05 | 0.30720296 | 0.37870855 |
| hsa-miR-488-5p  | 3 | 3.67100868 | 1.06E-05 | 0.27240469 | 0.36599099 |
| hsa-miR-3145-5p | 3 | 3.67034068 | 8.97E-06 | 0.27245427 | 0.375      |
| hsa-miR-1257    | 3 | 3.47261189 | 7.52E-05 | 0.28796768 | 0.37642586 |
| hsa-miR-7845-5p | 3 | 3.52738811 | 2.90E-05 | 0.28349588 | 0.35649123 |
| hsa-miR-6500-5p | 3 | 3.34368737 | 5.28E-05 | 0.29907102 | 0.40626461 |
| hsa-miR-6884-3p | 3 | 3.4759519  | 5.13E-05 | 0.28769098 | 0.35764555 |
| hsa-miR-323b-3p | 3 | 3.43520374 | 3.31E-05 | 0.29110355 | 0.384171   |
| hsa-miR-4483    | 3 | 3.45457582 | 3.04E-05 | 0.28947114 | 0.40131187 |
| hsa-miR-6875-5p | 3 | 3.47929192 | 2.90E-05 | 0.2874148  | 0.38352638 |
| hsa-miR-892b    | 3 | 3.45390782 | 2.87E-05 | 0.28952713 | 0.39430894 |
| hsa-miR-4633-3p | 3 | 3.34368737 | 5.28E-05 | 0.29907102 | 0.40626461 |
| hsa-miR-668-3p  | 3 | 3.49599198 | 1.28E-05 | 0.28604185 | 0.3962017  |
| hsa-miR-3126-5p | 3 | 3.47929192 | 2.90E-05 | 0.2874148  | 0.38352638 |
| hsa-miR-3147    | 3 | 3.56279225 | 1.39E-05 | 0.28067873 | 0.34751773 |
| hsa-miR-1193    | 3 | 3.38443554 | 4.92E-05 | 0.29547025 | 0.40621814 |
| hsa-miR-7706    | 3 | 3.50133601 | 4.00E-05 | 0.28560527 | 0.35170068 |
| hsa-miR-19a     | 3 | 3.45390782 | 2.08E-05 | 0.28952713 | 0.40805604 |
| hsa-miR-5587-5p | 3 | 3.48597194 | 2.18E-05 | 0.28686404 | 0.39200999 |
| hsa-miR-563     | 3 | 3.4004676  | 4.69E-05 | 0.2940772  | 0.38845956 |
| hsa-miR-3907    | 3 | 3.53740815 | 4.77E-05 | 0.28269285 | 0.35384615 |
| hsa-miR-6762-3p | 3 | 3.49064796 | 3.39E-05 | 0.28647976 | 0.38730159 |
| hsa-miR-6829-5p | 3 | 3.69038076 | 1.94E-05 | 0.27097475 | 0.36758893 |
| hsa-miR-4791    | 3 | 3.71175685 | 1.40E-05 | 0.2694142  | 0.34970238 |
| CDH3 up         | 3 | 3.31730127 | 1.36E-05 | 0.30144986 | 0.36470588 |
| hsa-miR-6810-3p | 3 | 3.89478958 | 5.74E-06 | 0.25675328 | 0.35820896 |
| hsa-miR-6801-3p | 3 | 3.89478958 | 5.74E-06 | 0.25675328 | 0.35820896 |
| hsa-miR-7641    | 3 | 3.76386106 | 1.02E-05 | 0.26568462 | 0.3556797  |
| hsa-miR-4797-3p | 3 | 3.62692051 | 1.06E-05 | 0.275716   | 0.38322718 |
| hsa-miR-6808-3p | 3 | 3.64762859 | 1.31E-05 | 0.27415072 | 0.3721393  |
| hsa-miR-6800-3p | 3 | 3.76987308 | 1.65E-05 | 0.26526092 | 0.35323383 |
| hsa-miR-4711-3p | 3 | 3.5260521  | 2.58E-05 | 0.2836033  | 0.37061404 |
| hsa-miR-626     | 3 | 3.73914496 | 4.65E-06 | 0.26744082 | 0.36163522 |
| hsa-miR-7108-3p | 3 | 3.84535738 | 3.85E-06 | 0.26005385 | 0.36862745 |
| hsa-miR-8070    | 3 | 3.62625251 | 1.49E-05 | 0.27576679 | 0.38733706 |
| hsa-miR-4693-5p | 3 | 3.72778891 | 1.09E-05 | 0.26825553 | 0.35211268 |
| hsa-miR-147b    | 3 | 3.85337341 | 1.38E-05 | 0.25951287 | 0.34666667 |
| hsa-miR-6844    | 3 | 3.6743487  | 1.47E-05 | 0.27215708 | 0.36616162 |
| hsa-miR-3927-3p | 3 | 3.61155645 | 1.90E-05 | 0.27688893 | 0.36759259 |
| hsa-miR-6831-5p | 3 | 3.61155645 | 1.90E-05 | 0.27688893 | 0.36759259 |
| hsa-miR-671-3p  | 3 | 3.69505678 | 7.34E-06 | 0.27063184 | 0.34828102 |
| hsa-miR-197-5p  | 3 | 3.71843687 | 8.26E-05 | 0.26893021 | 0.34487734 |
| hsa-miR-610     | 3 | 3.41048764 | 5.13E-05 | 0.2932132  | 0.37003058 |
| CYP2C9 down     | 3 | 3.31863727 | 1.12E-06 | 0.3013285  | 0.42222222 |
| hsa-miR-3161    | 3 | 3.64562458 | 2.04E-05 | 0.27430142 | 0.36666667 |

|                 |   |            |          |            |            |
|-----------------|---|------------|----------|------------|------------|
| hsa-miR-7162-5p | 3 | 3.88009352 | 7.50E-06 | 0.25772575 | 0.36324786 |
| hsa-miR-516b-3p | 3 | 3.88009352 | 7.50E-06 | 0.25772575 | 0.36324786 |
| hsa-miR-4523    | 3 | 3.71843687 | 5.26E-06 | 0.26893021 | 0.36086957 |
| hsa-miR-299-3p  | 3 | 3.71977288 | 1.11E-05 | 0.26883362 | 0.36173393 |
| hsa-miR-664b-3p | 3 | 3.78323313 | 1.63E-05 | 0.26432418 | 0.36706349 |
| hsa-miR-376b-5p | 3 | 3.50801603 | 2.27E-05 | 0.28506141 | 0.3926499  |
| hsa-miR-376c-5p | 3 | 3.50801603 | 2.27E-05 | 0.28506141 | 0.3926499  |
| hsa-miR-1295a   | 3 | 3.64495658 | 7.18E-06 | 0.27435169 | 0.36933798 |
| hsa-miR-4453    | 3 | 3.67368069 | 3.28E-05 | 0.27220656 | 0.35740072 |
| hsa-miR-4538    | 3 | 3.67368069 | 3.28E-05 | 0.27220656 | 0.35740072 |
| hsa-miR-4744    | 3 | 3.76118904 | 4.13E-06 | 0.26587337 | 0.35959596 |
| hsa-miR-4707-5p | 3 | 3.72712091 | 1.33E-05 | 0.26830361 | 0.35887097 |
| hsa-miR-6827-5p | 3 | 3.84468938 | 7.36E-06 | 0.26009904 | 0.35135135 |
| hsa-miR-4776-3p | 3 | 3.77989312 | 5.30E-06 | 0.26455774 | 0.3562341  |
| hsa-miR-3664-3p | 3 | 3.71643287 | 8.09E-06 | 0.26907522 | 0.3902439  |
| hsa-miR-5584-5p | 3 | 3.74248497 | 1.25E-05 | 0.26720214 | 0.34328358 |
| hsa-miR-627-3p  | 3 | 3.83132933 | 1.77E-05 | 0.26100602 | 0.33585859 |
| hsa-miR-510-5p  | 3 | 3.71042084 | 2.07E-05 | 0.26951121 | 0.35131397 |
| hsa-miR-512-5p  | 3 | 3.82865731 | 3.80E-06 | 0.26118817 | 0.36049383 |
| hsa-miR-601     | 3 | 3.74248497 | 3.20E-06 | 0.26720214 | 0.37356322 |
| ECHDC2 down     | 3 | 3.47027388 | 1.70E-06 | 0.28816169 | 0.375      |
| hsa-miR-4255    | 3 | 3.71376086 | 3.93E-06 | 0.26926882 | 0.37480064 |
| hsa-miR-3151-5p | 3 | 3.67167669 | 1.90E-05 | 0.27235514 | 0.35696517 |
| hsa-miR-1256    | 3 | 3.59352037 | 2.76E-05 | 0.27827865 | 0.35165794 |
| hsa-miR-4423-3p | 3 | 3.59686039 | 4.47E-05 | 0.27802024 | 0.35008818 |
| EPHB6 down      | 3 | 3.1756847  | 6.87E-06 | 0.31489272 | 0.40298507 |
| EPPK1 up        | 3 | 3.56980628 | 3.69E-06 | 0.28012725 | 0.36363636 |
| hsa-miR-3923    | 3 | 3.64228457 | 1.14E-05 | 0.27455296 | 0.37419355 |
| hsa-miR-4471    | 3 | 3.8006012  | 1.71E-05 | 0.26311627 | 0.35416667 |
| hsa-miR-6501-3p | 3 | 3.71576486 | 1.32E-05 | 0.2691236  | 0.35209235 |
| hsa-miR-8059    | 3 | 3.8006012  | 1.71E-05 | 0.26311627 | 0.35416667 |
| hsa-miR-3977    | 3 | 3.73112892 | 5.67E-06 | 0.2680154  | 0.35460993 |
| hsa-miR-4683    | 3 | 3.78657315 | 5.13E-06 | 0.26409103 | 0.37753223 |
| hsa-miR-5695    | 3 | 3.74782899 | 6.63E-06 | 0.26682114 | 0.35294118 |
| hsa-miR-4663    | 3 | 3.80594522 | 1.42E-05 | 0.26274682 | 0.3415978  |
| hsa-miR-1       | 3 | 3.78456914 | 4.02E-06 | 0.26423087 | 0.36458333 |
| hsa-miR-3674    | 3 | 3.86740147 | 1.11E-05 | 0.25857155 | 0.34218289 |
| hsa-miR-200b-5p | 3 | 3.49064796 | 3.30E-05 | 0.28647976 | 0.380085   |
| FLG down        | 3 | 3.4749499  | 8.44E-06 | 0.28777393 | 0.36507937 |
| hsa-miR-887-3p  | 3 | 3.81128925 | 6.99E-06 | 0.26237841 | 0.34079602 |
| hsa-miR-3118    | 3 | 3.49532398 | 2.26E-05 | 0.28609651 | 0.39489194 |
| hsa-miR-3607-5p | 3 | 3.70774883 | 8.84E-06 | 0.26970543 | 0.38415546 |
| hsa-miR-6872-3p | 3 | 3.73714095 | 1.56E-05 | 0.26758423 | 0.36720143 |
| hsa-miR-222     | 3 | 3.53674015 | 2.02E-05 | 0.28274625 | 0.36807095 |
| hsa-miR-630     | 3 | 3.88009352 | 5.99E-06 | 0.25772575 | 0.33333333 |
| hsa-miR-4296    | 3 | 3.5741483  | 2.23E-05 | 0.27978694 | 0.37606838 |
| hsa-miR-6802-3p | 3 | 3.71175685 | 1.85E-05 | 0.2694142  | 0.36100629 |

|                 |   |            |          |            |            |
|-----------------|---|------------|----------|------------|------------|
| hsa-miR-1468-5p | 3 | 3.90414162 | 1.13E-05 | 0.25613825 | 0.34035088 |
| GATSL3 down     | 3 | 3.28456914 | 8.88E-06 | 0.30445394 | 0.37301587 |
| hsa-miR-4499    | 3 | 3.750501   | 1.97E-05 | 0.26663104 | 0.34150327 |
| hsa-miR-3162-3p | 3 | 3.83734135 | 1.75E-05 | 0.26059709 | 0.33568075 |
| hsa-miR-6815-5p | 3 | 3.61890448 | 1.08E-05 | 0.27632672 | 0.38423154 |
| hsa-miR-6746-5p | 3 | 3.66633267 | 1.65E-05 | 0.27275212 | 0.37299035 |
| hsa-miR-6802-5p | 3 | 3.59686039 | 1.41E-05 | 0.27802024 | 0.39814815 |
| hsa-miR-6865-5p | 3 | 3.61890448 | 1.08E-05 | 0.27632672 | 0.38423154 |
| hsa-miR-4696    | 3 | 3.6750167  | 1.73E-05 | 0.27210761 | 0.38300221 |
| hsa-miR-4519    | 3 | 3.66432866 | 3.80E-05 | 0.27290129 | 0.34793187 |
| hsa-miR-196b-3p | 3 | 3.76386106 | 3.15E-06 | 0.26568462 | 0.36746988 |
| hsa-miR-1225-5p | 3 | 3.74048096 | 6.28E-06 | 0.2673453  | 0.35416667 |
| hsa-miR-584-3p  | 3 | 3.77321309 | 7.42E-06 | 0.26502611 | 0.35810811 |
| hsa-miR-200c-5p | 3 | 3.5487642  | 1.75E-05 | 0.28178824 | 0.3744186  |
| hsa-miR-6841-3p | 3 | 3.79792919 | 1.45E-05 | 0.26330138 | 0.35477583 |
| hsa-miR-4418    | 3 | 3.56412826 | 9.20E-06 | 0.28057352 | 0.40890008 |
| hsa-miR-6879-3p | 3 | 3.82865731 | 9.86E-06 | 0.26118817 | 0.39552239 |
| hsa-miR-5189-3p | 3 | 3.5507682  | 3.04E-05 | 0.2816292  | 0.35516739 |
| hsa-miR-4712-3p | 3 | 3.78456914 | 8.48E-05 | 0.26423087 | 0.37962963 |
| hsa-miR-4758-5p | 3 | 3.61556446 | 9.68E-06 | 0.27658199 | 0.38638639 |
| hsa-miR-8057    | 3 | 3.67768871 | 1.19E-05 | 0.27190991 | 0.35670357 |
| hsa-miR-1238-5p | 3 | 3.61556446 | 9.68E-06 | 0.27658199 | 0.38638639 |
| hsa-miR-4645-5p | 3 | 3.64228457 | 2.21E-05 | 0.27455296 | 0.35009862 |
| hsa-miR-4289    | 3 | 3.59285237 | 2.54E-05 | 0.27833039 | 0.34089001 |
| hsa-miR-5003-5p | 3 | 3.65898464 | 2.17E-05 | 0.27329986 | 0.36165577 |
| hsa-miR-6817-3p | 3 | 3.77054108 | 1.23E-05 | 0.26521393 | 0.35542169 |
| hsa-miR-144-5p  | 3 | 3.47728791 | 3.22E-05 | 0.28758044 | 0.37413685 |
| hsa-miR-6836-5p | 3 | 3.64495658 | 2.28E-05 | 0.27435169 | 0.35037879 |
| hsa-miR-6132    | 3 | 3.64495658 | 2.28E-05 | 0.27435169 | 0.35037879 |
| hsa-miR-3529-5p | 3 | 3.59151637 | 2.06E-05 | 0.27843393 | 0.37226277 |
| hsa-miR-4774-5p | 3 | 3.75183701 | 6.13E-06 | 0.2665361  | 0.36683417 |
| hsa-miR-1909-5p | 3 | 3.60220441 | 6.73E-06 | 0.27760779 | 0.40842491 |
| hsa-miR-3928-5p | 3 | 3.5260521  | 1.70E-05 | 0.2836033  | 0.36637298 |
| hsa-miR-6882-5p | 3 | 3.50200401 | 1.79E-05 | 0.28555079 | 0.3814433  |
| hsa-miR-6830-3p | 3 | 3.750501   | 3.93E-05 | 0.26663104 | 0.33486239 |
| hsa-miR-6806-3p | 3 | 3.5260521  | 1.70E-05 | 0.2836033  | 0.36637298 |
| hsa-miR-6740-5p | 3 | 3.67969272 | 2.20E-05 | 0.27176182 | 0.33809524 |
| hsa-miR-4531    | 3 | 3.47194389 | 2.53E-05 | 0.28802309 | 0.38983051 |
| hsa-miR-4652-3p | 3 | 3.71042084 | 1.15E-05 | 0.26951121 | 0.35330261 |
| hsa-miR-607     | 3 | 3.48263193 | 5.31E-05 | 0.28713916 | 0.36654135 |
| hsa-miR-5700    | 3 | 3.6756847  | 2.26E-05 | 0.27205816 | 0.35301353 |
| hsa-miR-4708-3p | 3 | 3.56479626 | 1.28E-05 | 0.28052094 | 0.37439614 |
| hsa-miR-7155-3p | 3 | 3.78991316 | 1.13E-05 | 0.26385829 | 0.35281385 |
| hsa-miR-3675-3p | 3 | 3.73380094 | 1.15E-05 | 0.2678236  | 0.35333333 |
| hsa-miR-3136-3p | 3 | 3.78991316 | 1.13E-05 | 0.26385829 | 0.35281385 |
| hsa-miR-1203    | 3 | 3.71108884 | 1.05E-05 | 0.26946269 | 0.35185185 |
| KRT14 up        | 3 | 3.30928524 | 4.92E-06 | 0.30218006 | 0.38297872 |

|                   |      |   |            |          |            |            |
|-------------------|------|---|------------|----------|------------|------------|
| KRT4              | down | 3 | 3.12291249 | 2.28E-05 | 0.3202139  | 0.40184453 |
| hsa-miR-4732-5p   |      | 3 | 3.64362057 | 2.78E-05 | 0.27445229 | 0.3442623  |
| hsa-miR-190b      |      | 3 | 3.70774883 | 7.07E-06 | 0.26970543 | 0.34795322 |
| hsa-miR-6715b-5p  |      | 3 | 3.76118904 | 1.17E-05 | 0.26587337 | 0.35714286 |
| hsa-miR-4269      |      | 3 | 3.76118904 | 1.17E-05 | 0.26587337 | 0.35714286 |
| hsa-miR-8060      |      | 3 | 3.53941216 | 6.37E-05 | 0.28253279 | 0.36383442 |
| hsa-miR-4738-5p   |      | 3 | 3.5754843  | 2.02E-05 | 0.27968239 | 0.35703364 |
| hsa-miR-378f      |      | 3 | 3.5260521  | 1.76E-05 | 0.2836033  | 0.38830162 |
| hsa-miR-378b      |      | 3 | 3.4759519  | 3.51E-05 | 0.28769098 | 0.39483395 |
| hsa-miR-5006-5p   |      | 3 | 3.500668   | 3.63E-05 | 0.28565977 | 0.38301887 |
| hsa-miR-6757-5p   |      | 3 | 3.42785571 | 5.60E-05 | 0.29172757 | 0.36677116 |
| hsa-miR-5191      |      | 3 | 3.40714763 | 5.00E-05 | 0.29350064 | 0.36676647 |
| hsa-miR-7974      |      | 3 | 3.50801603 | 2.29E-05 | 0.28506141 | 0.37423313 |
| hsa-miR-5681a     |      | 3 | 3.71042084 | 9.93E-06 | 0.26951121 | 0.3572327  |
| hsa-miR-613       |      | 3 | 3.72110888 | 6.42E-06 | 0.2687371  | 0.38861789 |
| hsa-miR-4491      |      | 3 | 3.57147629 | 2.10E-05 | 0.27999626 | 0.35933806 |
| hsa-miR-8062      |      | 3 | 3.74782899 | 7.24E-06 | 0.26682114 | 0.39553429 |
| hsa-miR-211-3p    |      | 3 | 3.61756847 | 1.18E-05 | 0.27642877 | 0.38888889 |
| hsa-miR-4712-5p   |      | 3 | 3.63627255 | 1.80E-05 | 0.27500689 | 0.40625    |
| hsa-miR-4742-5p   |      | 3 | 3.51870407 | 4.80E-05 | 0.28419554 | 0.35334714 |
| hsa-miR-4291      |      | 3 | 3.92885772 | 5.55E-06 | 0.25452691 | 0.35390947 |
| hsa-miR-6748-5p   |      | 3 | 3.75584502 | 3.21E-05 | 0.26625167 | 0.33980583 |
| hsa-miR-4435      |      | 3 | 3.52137609 | 5.79E-05 | 0.28397989 | 0.36231884 |
| MXRA5             | down | 3 | 3.67134269 | 2.81E-06 | 0.27237991 | 0.35658915 |
| hsa-miR-5007-5p   |      | 3 | 3.77722111 | 9.61E-06 | 0.26474489 | 0.36231884 |
| hsa-miR-3691-3p   |      | 3 | 3.53941216 | 2.63E-05 | 0.28253279 | 0.35996956 |
| hsa-miR-1185-2-3p |      | 3 | 3.45925184 | 2.80E-05 | 0.28907985 | 0.38146168 |
| hsa-miR-1185-1-3p |      | 3 | 3.45925184 | 2.80E-05 | 0.28907985 | 0.38146168 |
| hsa-miR-3130-3p   |      | 3 | 3.55811623 | 2.35E-05 | 0.28104759 | 0.35736434 |
| NOV               | down | 3 | 3.33132933 | 1.07E-06 | 0.30018047 | 0.42016807 |
| hsa-miR-4313      |      | 3 | 3.83533734 | 6.59E-06 | 0.26073326 | 0.33760684 |
| hsa-miR-1183      |      | 3 | 3.74649299 | 8.68E-06 | 0.26691629 | 0.36095764 |
| hsa-miR-451a      |      | 3 | 3.7257849  | 1.08E-05 | 0.26839982 | 0.3663522  |
| PAMR1             | down | 3 | 3.66933868 | 1.33E-06 | 0.27252867 | 0.44444444 |
| hsa-miR-203b-3p   |      | 3 | 3.69372077 | 2.81E-05 | 0.27072972 | 0.34578147 |
| hsa-miR-6165      |      | 3 | 3.63293253 | 1.76E-05 | 0.27525972 | 0.38358974 |
| hsa-miR-128-2-5p  |      | 3 | 3.78189713 | 1.37E-05 | 0.26441756 | 0.36231884 |
| hsa-miR-128-1-5p  |      | 3 | 3.78189713 | 1.37E-05 | 0.26441756 | 0.36231884 |
| hsa-miR-1227-5p   |      | 3 | 3.78189713 | 1.37E-05 | 0.26441756 | 0.36231884 |
| hsa-miR-6852-3p   |      | 3 | 3.82732131 | 6.08E-06 | 0.26127934 | 0.3604336  |
| hsa-miR-3909      |      | 3 | 3.82732131 | 6.08E-06 | 0.26127934 | 0.3604336  |
| hsa-miR-609       |      | 3 | 3.76920508 | 1.15E-05 | 0.26530793 | 0.34259259 |
| hsa-miR-1285-5p   |      | 3 | 3.54609218 | 6.08E-05 | 0.28200057 | 0.3503909  |
| PLEK2             | up   | 3 | 3.41082164 | 3.90E-06 | 0.29318449 | 0.39365079 |
| hsa-miR-5047      |      | 3 | 3.56012024 | 1.94E-05 | 0.28088939 | 0.38888889 |
| hsa-miR-1322      |      | 3 | 3.80861723 | 8.75E-06 | 0.26256248 | 0.34772182 |
| hsa-miR-370-5p    |      | 3 | 3.6249165  | 2.38E-05 | 0.27586842 | 0.37704918 |

|                  |      |   |            |          |            |            |
|------------------|------|---|------------|----------|------------|------------|
| PTN              | down | 3 | 3.56913828 | 1.46E-05 | 0.28017967 | 0.35028249 |
| hsa-miR-6504-5p  |      | 3 | 3.500668   | 1.59E-05 | 0.28565977 | 0.40591398 |
| hsa-miR-3064-5p  |      | 3 | 3.500668   | 1.59E-05 | 0.28565977 | 0.40591398 |
| hsa-miR-643      |      | 3 | 3.44388778 | 3.57E-05 | 0.29036951 | 0.40906483 |
| hsa-miR-6776-5p  |      | 3 | 3.60354041 | 2.52E-05 | 0.27750487 | 0.35635359 |
| hsa-miR-3192-3p  |      | 3 | 3.76052104 | 1.44E-05 | 0.2659206  | 0.3490701  |
| SERPINB7         | down | 3 | 3.79692719 | 2.45E-06 | 0.26337087 | 0.33333333 |
| hsa-miR-4753-3p  |      | 3 | 3.70374081 | 8.56E-06 | 0.26999729 | 0.37944664 |
| hsa-miR-2115-3p  |      | 3 | 3.62291249 | 8.95E-06 | 0.27602102 | 0.35996055 |
| hsa-miR-4765     |      | 3 | 3.55544422 | 1.70E-05 | 0.28125881 | 0.36296296 |
| hsa-miR-561-5p   |      | 3 | 3.31229125 | 6.20E-05 | 0.30190582 | 0.41894828 |
| TCAP             | down | 3 | 3.95925184 | 1.38E-06 | 0.25257297 | 0.48611111 |
| TNFRSF6B         | up   | 3 | 3.20841683 | 8.03E-06 | 0.3116802  | 0.4021164  |
| TREX2            | down | 3 | 3.53173013 | 5.22E-06 | 0.28314734 | 0.34057971 |
| hsa-miR-4680-3p  |      | 3 | 3.50334001 | 1.90E-05 | 0.28544189 | 0.39918534 |
| TSTA3            | up   | 3 | 3.46292585 | 2.03E-05 | 0.28877315 | 0.34556575 |
| WNK4             | down | 3 | 3.60721443 | 2.02E-06 | 0.27722222 | 0.36612022 |
| ABLIM3           | down | 2 | 3.47294589 | 1.10E-06 | 0.28793999 | 0.5375     |
| hsa-miR-6854-3p  |      | 2 | 3.70841683 | 3.15E-06 | 0.26965685 | 0.52439024 |
| hsa-miR-581      |      | 2 | 3.72912492 | 3.39E-06 | 0.26815943 | 0.55392157 |
| hsa-miR-875-5p   |      | 2 | 3.58750835 | 1.09E-05 | 0.278745   | 0.53102625 |
| hsa-miR-6126     |      | 2 | 3.84535738 | 3.82E-06 | 0.26005385 | 0.50384615 |
| hsa-miR-3144-3p  |      | 2 | 3.58750835 | 1.09E-05 | 0.278745   | 0.53102625 |
| hsa-miR-4715-3p  |      | 2 | 3.83867735 | 3.85E-06 | 0.2605064  | 0.51102941 |
| hsa-miR-7153-3p  |      | 2 | 4.04843019 | 1.69E-06 | 0.24700932 | 0.5        |
| hsa-miR-365a-5p  |      | 2 | 3.8493654  | 4.30E-06 | 0.25978308 | 0.51785714 |
| hsa-miR-568      |      | 2 | 3.97027388 | 1.05E-06 | 0.25187179 | 0.51351351 |
| hsa-miR-4280     |      | 2 | 3.73580494 | 4.14E-06 | 0.26767993 | 0.51440329 |
| hsa-miR-6811-3p  |      | 2 | 4.0744823  | 1.30E-06 | 0.24542995 | 0.52       |
| hsa-miR-3174     |      | 2 | 3.74114896 | 9.27E-06 | 0.26729756 | 0.51068376 |
| hsa-miR-4462     |      | 2 | 3.84268537 | 4.88E-06 | 0.26023468 | 0.50961538 |
| hsa-miR-4456     |      | 2 | 3.79258517 | 4.23E-06 | 0.26367239 | 0.50852273 |
| hsa-miR-7108-5p  |      | 2 | 3.75317301 | 4.15E-06 | 0.26644122 | 0.51923077 |
| hsa-miR-663b     |      | 2 | 3.73380094 | 7.08E-06 | 0.2678236  | 0.5122549  |
| hsa-miR-3614-3p  |      | 2 | 3.5988644  | 1.47E-05 | 0.27786543 | 0.51621622 |
| hsa-miR-662      |      | 2 | 3.80728123 | 1.43E-06 | 0.26265462 | 0.50813008 |
| hsa-miR-6895-3p  |      | 2 | 3.73446894 | 5.01E-06 | 0.26777569 | 0.53645833 |
| hsa-miR-3974     |      | 2 | 3.79458918 | 4.04E-06 | 0.26353314 | 0.50684932 |
| hsa-miR-6827-3p  |      | 2 | 3.84669339 | 7.96E-06 | 0.25996353 | 0.50917431 |
| hsa-miR-4457     |      | 2 | 3.749165   | 4.13E-06 | 0.26672606 | 0.56578947 |
| hsa-miR-7515     |      | 2 | 3.93954576 | 1.34E-06 | 0.25383637 | 0.52586207 |
| hsa-miR-325      |      | 2 | 3.87675351 | 4.29E-06 | 0.25794779 | 0.5106383  |
| hsa-miR-6864-5p  |      | 2 | 3.90748163 | 3.66E-06 | 0.25591931 | 0.50609756 |
| hsa-miR-943      |      | 2 | 3.95758183 | 1.20E-06 | 0.25267955 | 0.51785714 |
| hsa-miR-1255b-5p |      | 2 | 3.83667335 | 1.76E-06 | 0.26064247 | 0.51145038 |
| hsa-miR-4662a-3p |      | 2 | 3.751169   | 3.84E-06 | 0.26658356 | 0.51843318 |
| hsa-miR-3660     |      | 2 | 3.75450902 | 9.12E-06 | 0.26634641 | 0.50913242 |



|                  |   |            |          |            |            |
|------------------|---|------------|----------|------------|------------|
| hsa-miR-4526     | 2 | 3.75450902 | 9.12E-06 | 0.26634641 | 0.50913242 |
| hsa-miR-1251-3p  | 2 | 3.76987308 | 4.13E-06 | 0.26526092 | 0.52806122 |
| AMY2B down       | 2 | 3.52705411 | 1.17E-05 | 0.28352273 | 0.5        |
| hsa-miR-3173-5p  | 2 | 3.85671343 | 3.17E-06 | 0.25928813 | 0.54724409 |
| hsa-miR-1249-3p  | 2 | 3.92017368 | 4.70E-06 | 0.25509074 | 0.5        |
| hsa-miR-4724-5p  | 2 | 3.85136941 | 4.54E-06 | 0.25964791 | 0.5037594  |
| hsa-miR-4275     | 2 | 3.80728123 | 5.97E-06 | 0.26265462 | 0.53642384 |
| hsa-miR-6799-3p  | 2 | 3.85671343 | 3.17E-06 | 0.25928813 | 0.54724409 |
| hsa-miR-1250-5p  | 2 | 3.75384102 | 5.26E-06 | 0.26639381 | 0.50789474 |
| hsa-miR-3936     | 2 | 3.75718103 | 1.17E-05 | 0.26615699 | 0.51229508 |
| hsa-miR-7976     | 2 | 3.85671343 | 3.17E-06 | 0.25928813 | 0.54724409 |
| hsa-miR-670-5p   | 2 | 3.62959252 | 1.14E-05 | 0.27551302 | 0.52662722 |
| hsa-miR-448      | 2 | 3.55611222 | 1.54E-05 | 0.28120597 | 0.525      |
| hsa-miR-4319     | 2 | 3.62959252 | 1.14E-05 | 0.27551302 | 0.52662722 |
| ANKRD37 down     | 2 | 4.18904476 | 1.31E-06 | 0.23871791 | 0.5        |
| hsa-miR-4632-3p  | 2 | 3.86406146 | 1.93E-06 | 0.25879506 | 0.52083333 |
| hsa-miR-4671-3p  | 2 | 3.83600534 | 1.29E-06 | 0.26068785 | 0.54411765 |
| hsa-miR-7705     | 2 | 3.86339345 | 1.51E-06 | 0.2588398  | 0.50694444 |
| hsa-miR-6751-5p  | 2 | 3.71843687 | 2.24E-06 | 0.26893021 | 0.52927928 |
| hsa-miR-6803-5p  | 2 | 3.71843687 | 2.24E-06 | 0.26893021 | 0.52927928 |
| hsa-miR-384      | 2 | 3.79859719 | 9.00E-06 | 0.26325508 | 0.51470588 |
| hsa-miR-4746-3p  | 2 | 3.53473614 | 6.53E-06 | 0.28290655 | 0.54891304 |
| hsa-miR-4777-5p  | 2 | 3.82264529 | 2.16E-06 | 0.26159895 | 0.55769231 |
| hsa-miR-518e-5p  | 2 | 3.82264529 | 2.16E-06 | 0.26159895 | 0.55769231 |
| hsa-miR-519b-5p  | 2 | 3.82264529 | 2.16E-06 | 0.26159895 | 0.55769231 |
| hsa-miR-523-5p   | 2 | 3.82264529 | 2.16E-06 | 0.26159895 | 0.55769231 |
| hsa-miR-519c-5p  | 2 | 3.82264529 | 2.16E-06 | 0.26159895 | 0.55769231 |
| B3GNT3 up        | 2 | 3.31796927 | 4.50E-06 | 0.30138917 | 0.55191257 |
| hsa-miR-6505-5p  | 2 | 3.89345357 | 3.23E-05 | 0.25684138 | 0.5        |
| hsa-miR-6510-5p  | 2 | 3.72645291 | 3.63E-06 | 0.26835171 | 0.51507538 |
| hsa-miR-187-3p   | 2 | 3.81997328 | 9.70E-07 | 0.26178194 | 0.52173913 |
| hsa-miR-4703-3p  | 2 | 3.75784903 | 2.37E-06 | 0.26610968 | 0.52469136 |
| hsa-miR-4679     | 2 | 3.75183701 | 4.42E-06 | 0.2665361  | 0.50578035 |
| hsa-miR-2053     | 2 | 3.64228457 | 6.76E-06 | 0.27455296 | 0.54662379 |
| hsa-miR-4716-5p  | 2 | 3.72712091 | 3.07E-06 | 0.26830361 | 0.53076923 |
| hsa-miR-4659a-5p | 2 | 3.80394122 | 1.07E-05 | 0.26288524 | 0.50632911 |
| hsa-miR-4769-3p  | 2 | 3.9495658  | 5.21E-06 | 0.25319239 | 0.52597403 |
| hsa-miR-6817-5p  | 2 | 3.9495658  | 5.21E-06 | 0.25319239 | 0.52597403 |
| hsa-miR-4659b-5p | 2 | 3.80394122 | 1.07E-05 | 0.26288524 | 0.50632911 |
| hsa-miR-4714-3p  | 2 | 3.59285237 | 5.37E-06 | 0.27833039 | 0.54545455 |
| hsa-miR-6717-5p  | 2 | 3.59285237 | 5.37E-06 | 0.27833039 | 0.54545455 |
| hsa-miR-8053     | 2 | 3.59285237 | 5.37E-06 | 0.27833039 | 0.54545455 |
| hsa-miR-4529-5p  | 2 | 3.75384102 | 7.35E-06 | 0.26639381 | 0.51794872 |
| hsa-miR-7978     | 2 | 3.93353373 | 6.72E-06 | 0.25422434 | 0.5        |
| hsa-miR-4795-3p  | 2 | 3.8253173  | 1.91E-06 | 0.26141622 | 0.52985075 |
| hsa-miR-3128     | 2 | 3.77722111 | 2.80E-06 | 0.26474489 | 0.52890173 |
| hsa-miR-3064-3p  | 2 | 3.71242485 | 6.94E-06 | 0.26936572 | 0.52583026 |

|                  |   |            |          |            |            |
|------------------|---|------------|----------|------------|------------|
| hsa-miR-3186-5p  | 2 | 3.75851703 | 5.15E-06 | 0.26606238 | 0.5212766  |
| CA3 down         | 2 | 3.40547762 | 6.06E-06 | 0.29364457 | 0.53125    |
| CALML5 down      | 2 | 3.36673347 | 4.14E-06 | 0.29702381 | 0.53821656 |
| hsa-miR-562      | 2 | 3.8493654  | 2.22E-06 | 0.25978308 | 0.50952381 |
| hsa-miR-6719-3p  | 2 | 3.94154977 | 1.48E-06 | 0.25370731 | 0.52631579 |
| CAPN14 up        | 2 | 3.8490314  | 5.00E-07 | 0.25980562 | 0.57142857 |
| hsa-miR-645      | 2 | 3.64161657 | 1.59E-05 | 0.27460332 | 0.51490515 |
| hsa-miR-7856-5p  | 2 | 3.69305277 | 8.75E-06 | 0.27077869 | 0.52739726 |
| hsa-miR-4317     | 2 | 3.88877756 | 4.71E-06 | 0.25715022 | 0.5        |
| hsa-miR-3074-3p  | 2 | 3.76386106 | 1.07E-05 | 0.26568462 | 0.5257732  |
| hsa-miR-6869-5p  | 2 | 3.8507014  | 6.90E-06 | 0.25969295 | 0.50480769 |
| hsa-miR-3692-5p  | 2 | 3.61356045 | 1.29E-05 | 0.27673537 | 0.51553672 |
| CCL14 down       | 2 | 3.40547762 | 6.06E-06 | 0.29364457 | 0.53125    |
| hsa-miR-4649-5p  | 2 | 3.76519706 | 3.95E-06 | 0.26559035 | 0.51794872 |
| hsa-miR-6729-5p  | 2 | 3.76519706 | 3.95E-06 | 0.26559035 | 0.51794872 |
| hsa-miR-4293     | 2 | 3.76653307 | 3.62E-06 | 0.26549614 | 0.51794872 |
| hsa-miR-1278     | 2 | 3.71442886 | 4.80E-06 | 0.26922039 | 0.5242915  |
| hsa-miR-3160-3p  | 2 | 3.65631263 | 6.32E-06 | 0.27349959 | 0.55555556 |
| hsa-miR-4425     | 2 | 3.58283233 | 5.03E-06 | 0.27910879 | 0.51507538 |
| hsa-miR-3153     | 2 | 3.43119572 | 2.70E-05 | 0.29144359 | 0.55528455 |
| hsa-miR-3591-3p  | 2 | 3.53674015 | 8.12E-06 | 0.28274625 | 0.53804348 |
| hsa-miR-6739-5p  | 2 | 3.43119572 | 2.70E-05 | 0.29144359 | 0.55528455 |
| hsa-miR-7112-3p  | 2 | 3.54609218 | 1.02E-05 | 0.28200057 | 0.53403756 |
| hsa-miR-138-2-3p | 2 | 3.5240481  | 9.14E-06 | 0.28376457 | 0.52857143 |
| hsa-miR-4666a-5p | 2 | 3.40981964 | 2.12E-05 | 0.29327064 | 0.57374392 |
| hsa-miR-491-3p   | 2 | 3.5494322  | 6.56E-06 | 0.2817352  | 0.52828054 |
| hsa-miR-3922-5p  | 2 | 3.56613226 | 3.33E-05 | 0.28041585 | 0.50125313 |
| hsa-miR-891b     | 2 | 3.5494322  | 1.02E-05 | 0.2817352  | 0.52908277 |
| hsa-miR-4715-5p  | 2 | 3.52738811 | 1.49E-05 | 0.28349588 | 0.52783964 |
| hsa-miR-4720-3p  | 2 | 3.57882432 | 3.99E-06 | 0.27942137 | 0.52125    |
| hsa-miR-3191-5p  | 2 | 3.55811623 | 3.08E-05 | 0.28104759 | 0.5        |
| hsa-miR-592      | 2 | 3.57214429 | 1.47E-05 | 0.2799439  | 0.50239808 |
| hsa-miR-6874-5p  | 2 | 3.40981964 | 2.12E-05 | 0.29327064 | 0.57374392 |
| hsa-miR-16       | 2 | 3.57281229 | 8.32E-06 | 0.27989156 | 0.50512821 |
| hsa-miR-2861     | 2 | 3.40981964 | 2.12E-05 | 0.29327064 | 0.57374392 |
| hsa-miR-2392     | 2 | 3.44255177 | 1.77E-05 | 0.2904822  | 0.58596491 |
| hsa-miR-6733-5p  | 2 | 3.43119572 | 2.70E-05 | 0.29144359 | 0.55528455 |
| hsa-miR-6853-5p  | 2 | 3.60354041 | 1.56E-05 | 0.27750487 | 0.52469136 |
| hsa-miR-4675     | 2 | 3.75651303 | 4.98E-06 | 0.26620432 | 0.54568528 |
| hsa-miR-1587     | 2 | 3.75651303 | 4.98E-06 | 0.26620432 | 0.54568528 |
| hsa-miR-3620-5p  | 2 | 3.75651303 | 4.98E-06 | 0.26620432 | 0.54568528 |
| hsa-miR-219b-5p  | 2 | 3.78724115 | 8.21E-06 | 0.26404445 | 0.50903614 |
| hsa-miR-4741     | 2 | 3.75651303 | 4.98E-06 | 0.26620432 | 0.54568528 |
| hsa-miR-3713     | 2 | 3.81329325 | 1.59E-05 | 0.26224052 | 0.50304878 |
| CD177 up         | 2 | 3.50367401 | 4.85E-06 | 0.28541468 | 0.50704225 |
| hsa-miR-7854-3p  | 2 | 3.85203741 | 1.53E-05 | 0.25960288 | 0.5045045  |
| hsa-miR-3201     | 2 | 3.86005344 | 4.13E-06 | 0.25906377 | 0.50854701 |

|                   |   |            |          |            |            |
|-------------------|---|------------|----------|------------|------------|
| hsa-miR-6744-5p   | 2 | 3.77120908 | 4.81E-06 | 0.26516695 | 0.51587302 |
| hsa-miR-642a-3p   | 2 | 3.58884436 | 1.12E-05 | 0.27864123 | 0.51937984 |
| hsa-miR-6728-5p   | 2 | 3.70374081 | 5.60E-06 | 0.26999729 | 0.54166667 |
| hsa-miR-585-3p    | 2 | 3.84201737 | 8.30E-07 | 0.26027993 | 0.54385965 |
| hsa-miR-1200      | 2 | 3.77855711 | 6.96E-06 | 0.26465129 | 0.51226994 |
| hsa-miR-5186      | 2 | 3.78456914 | 4.67E-06 | 0.26423087 | 0.50606061 |
| hsa-miR-4474-5p   | 2 | 3.57348029 | 6.26E-06 | 0.27983924 | 0.52619048 |
| hsa-miR-3129-5p   | 2 | 3.57348029 | 6.26E-06 | 0.27983924 | 0.52619048 |
| hsa-miR-7973      | 2 | 3.69639279 | 4.42E-06 | 0.27053402 | 0.52360515 |
| hsa-miR-5583-5p   | 2 | 3.8760855  | 1.84E-06 | 0.25799224 | 0.51271186 |
| hsa-miR-3129-3p   | 2 | 3.8760855  | 1.84E-06 | 0.25799224 | 0.51271186 |
| CLCA2 up          | 2 | 3.39078156 | 9.20E-07 | 0.29491726 | 0.54022989 |
| CLDN23 down       | 2 | 3.49699399 | 4.00E-07 | 0.28595989 | 0.57142857 |
| CLEC3B down       | 2 | 3.22979292 | 8.74E-06 | 0.30961737 | 0.54040404 |
| hsa-miR-210-5p    | 2 | 3.96960588 | 3.69E-06 | 0.25191418 | 0.51351351 |
| hsa-miR-4272      | 2 | 3.58617234 | 6.87E-06 | 0.27884884 | 0.54447115 |
| hsa-miR-4318      | 2 | 3.82999332 | 2.63E-06 | 0.26109706 | 0.51923077 |
| hsa-miR-6871-3p   | 2 | 3.78657315 | 1.84E-06 | 0.26409103 | 0.55277778 |
| hsa-miR-29c       | 2 | 3.81596526 | 7.00E-07 | 0.26205689 | 0.58203125 |
| hsa-miR-6715a-3p  | 2 | 3.7752171  | 2.17E-06 | 0.26488543 | 0.54285714 |
| hsa-miR-5000-3p   | 2 | 3.5995324  | 9.37E-06 | 0.27781386 | 0.50808625 |
| hsa-miR-4436a     | 2 | 3.5995324  | 9.37E-06 | 0.27781386 | 0.50808625 |
| hsa-miR-2116-5p   | 2 | 3.7752171  | 2.17E-06 | 0.26488543 | 0.54285714 |
| hsa-miR-597-3p    | 2 | 3.83667335 | 1.21E-06 | 0.26064247 | 0.58119658 |
| CRYAB down        | 2 | 3.50501002 | 1.46E-06 | 0.28530589 | 0.50833333 |
| hsa-miR-3132      | 2 | 4.03440214 | 1.13E-05 | 0.2478682  | 0.51086957 |
| CST6 down         | 2 | 3.22979292 | 8.74E-06 | 0.30961737 | 0.54040404 |
| hsa-miR-889-3p    | 2 | 3.79124916 | 1.63E-06 | 0.26376531 | 0.54362416 |
| hsa-miR-18a       | 2 | 3.67100868 | 2.51E-06 | 0.27240469 | 0.55714286 |
| hsa-miR-3139      | 2 | 3.87675351 | 1.43E-06 | 0.25794779 | 0.52272727 |
| hsa-miR-7152-3p   | 2 | 3.88209753 | 6.32E-06 | 0.2575927  | 0.5        |
| hsa-miR-4740-5p   | 2 | 3.62892452 | 1.04E-05 | 0.27556374 | 0.50696379 |
| hsa-miR-7153-5p   | 2 | 3.81663327 | 9.10E-07 | 0.26201103 | 0.54867257 |
| hsa-miR-599       | 2 | 3.85537742 | 4.46E-06 | 0.25937798 | 0.51149425 |
| DBP down          | 2 | 3.81496326 | 7.60E-07 | 0.26212572 | 0.52272727 |
| hsa-miR-5696      | 2 | 3.82331329 | 9.10E-07 | 0.26155325 | 0.56349206 |
| hsa-miR-376a-2-5p | 2 | 3.71776887 | 5.82E-06 | 0.26897853 | 0.53294574 |
| hsa-miR-1261      | 2 | 3.82331329 | 7.49E-06 | 0.26155325 | 0.51587302 |
| hsa-miR-3910      | 2 | 3.71776887 | 5.82E-06 | 0.26897853 | 0.53294574 |
| hsa-miR-5008-3p   | 2 | 3.66299265 | 2.17E-06 | 0.27300082 | 0.55805243 |
| hsa-miR-3908      | 2 | 3.73847695 | 2.75E-06 | 0.26748861 | 0.51704545 |
| DEFB4A up         | 2 | 3.24048096 | 1.11E-05 | 0.30859617 | 0.54726368 |
| DEFB4B up         | 2 | 3.24048096 | 1.11E-05 | 0.30859617 | 0.54726368 |
| DKK4 down         | 2 | 3.38276553 | 3.46E-06 | 0.29561611 | 0.525      |
| hsa-miR-374c-3p   | 2 | 3.65364061 | 2.44E-06 | 0.27369961 | 0.52525253 |
| hsa-miR-4678      | 2 | 3.59485638 | 5.78E-06 | 0.27817523 | 0.54567901 |
| hsa-miR-3121-5p   | 2 | 3.7999332  | 2.65E-06 | 0.26316252 | 0.52515723 |

|                  |   |            |          |            |            |
|------------------|---|------------|----------|------------|------------|
| hsa-miR-3912-5p  | 2 | 3.68971276 | 1.83E-06 | 0.27102381 | 0.54791667 |
| hsa-miR-7702     | 2 | 3.76920508 | 9.70E-07 | 0.26530793 | 0.53481013 |
| hsa-miR-6715b-3p | 2 | 3.79726119 | 1.92E-06 | 0.2633477  | 0.54511278 |
| hsa-miR-6822-5p  | 2 | 3.81262525 | 8.30E-06 | 0.26228647 | 0.50757576 |
| hsa-miR-6750-5p  | 2 | 3.81262525 | 8.30E-06 | 0.26228647 | 0.50757576 |
| hsa-miR-6867-3p  | 2 | 3.79525718 | 4.40E-06 | 0.26348676 | 0.52413793 |
| hsa-miR-6502-3p  | 2 | 3.85203741 | 2.25E-06 | 0.25960288 | 0.54       |
| hsa-miR-6821-5p  | 2 | 3.66633267 | 1.06E-05 | 0.27275212 | 0.50884956 |
| hsa-miR-508-3p   | 2 | 3.83800935 | 1.03E-06 | 0.26055174 | 0.52       |
| hsa-miR-8077     | 2 | 3.82932532 | 4.55E-06 | 0.26114261 | 0.51485149 |
| hsa-miR-6732-3p  | 2 | 3.71108884 | 5.73E-06 | 0.26946269 | 0.51605505 |
| hsa-miR-4684-5p  | 2 | 3.79325317 | 2.76E-06 | 0.26362596 | 0.53846154 |
| hsa-miR-4475     | 2 | 3.84402138 | 3.17E-06 | 0.26014423 | 0.50840336 |
| FAM189A2 down    | 2 | 3.72144289 | 8.00E-08 | 0.26871298 | 0.84259259 |
| hsa-miR-337-3p   | 2 | 3.97227789 | 2.44E-06 | 0.25174472 | 0.5        |
| hsa-miR-3164     | 2 | 3.70708083 | 3.49E-06 | 0.26975403 | 0.54440154 |
| hsa-miR-96-3p    | 2 | 3.84736139 | 1.67E-06 | 0.2599184  | 0.53043478 |
| hsa-miR-6820-3p  | 2 | 3.70708083 | 3.49E-06 | 0.26975403 | 0.54440154 |
| hsa-miR-4704-5p  | 2 | 3.76386106 | 2.96E-06 | 0.26568462 | 0.52662722 |
| hsa-miR-937-5p   | 2 | 3.68904476 | 5.92E-06 | 0.27107288 | 0.52272727 |
| hsa-miR-5586-5p  | 2 | 3.71242485 | 5.87E-06 | 0.26936572 | 0.52173913 |
| hsa-miR-5089-3p  | 2 | 3.82064128 | 3.42E-06 | 0.26173617 | 0.50438596 |
| hsa-miR-6816-3p  | 2 | 3.55544422 | 1.24E-05 | 0.28125881 | 0.52459016 |
| hsa-miR-6508-3p  | 2 | 3.84402138 | 1.31E-05 | 0.26014423 | 0.51075269 |
| hsa-miR-4681     | 2 | 3.69372077 | 8.28E-06 | 0.27072972 | 0.53736655 |
| hsa-miR-133a     | 2 | 3.83266533 | 6.74E-06 | 0.26091503 | 0.51736111 |
| hsa-miR-6746-3p  | 2 | 3.81462926 | 2.07E-06 | 0.26214867 | 0.51886792 |
| hsa-miR-548ba    | 2 | 3.71175685 | 3.15E-06 | 0.2694142  | 0.52477477 |
| hsa-miR-548ag    | 2 | 3.71175685 | 3.15E-06 | 0.2694142  | 0.52477477 |
| hsa-miR-5579-5p  | 2 | 3.72845691 | 4.81E-06 | 0.26820747 | 0.51282051 |
| hsa-miR-548ai    | 2 | 3.71175685 | 3.15E-06 | 0.2694142  | 0.52477477 |
| hsa-miR-570-5p   | 2 | 3.71175685 | 3.15E-06 | 0.2694142  | 0.52477477 |
| hsa-miR-7113-3p  | 2 | 3.89612558 | 7.80E-06 | 0.25666524 | 0.52112676 |
| hsa-miR-6781-5p  | 2 | 3.88276553 | 3.80E-06 | 0.25754839 | 0.50581395 |
| GADD45G down     | 2 | 3.51169005 | 1.59E-06 | 0.28476317 | 0.51298701 |
| hsa-miR-5702     | 2 | 3.78924516 | 1.02E-05 | 0.2639048  | 0.50931677 |
| hsa-miR-6796-3p  | 2 | 3.85404142 | 1.56E-05 | 0.25946789 | 0.5        |
| hsa-miR-1287-3p  | 2 | 3.97294589 | 4.27E-06 | 0.2517024  | 0.5        |
| hsa-miR-4669     | 2 | 3.72244489 | 5.78E-06 | 0.26864065 | 0.51632653 |
| hsa-miR-4253     | 2 | 3.751169   | 2.90E-06 | 0.26658356 | 0.52094241 |
| hsa-miR-767-3p   | 2 | 3.74448898 | 4.12E-06 | 0.26705914 | 0.52879581 |
| hsa-miR-6862-5p  | 2 | 3.751169   | 2.90E-06 | 0.26658356 | 0.52094241 |
| GSTM2 down       | 2 | 3.41148965 | 1.18E-06 | 0.29312708 | 0.55714286 |
| H19 down         | 2 | 3.56579826 | 7.20E-07 | 0.28044211 | 0.53246753 |
| hsa-miR-574-3p   | 2 | 3.67702071 | 6.08E-06 | 0.27195931 | 0.52777778 |
| hsa-miR-1298-5p  | 2 | 3.70908484 | 3.38E-06 | 0.26960828 | 0.5390625  |
| hsa-miR-323b-5p  | 2 | 3.73112892 | 2.50E-06 | 0.2680154  | 0.55116279 |

|                 |   |            |          |            |            |
|-----------------|---|------------|----------|------------|------------|
| hsa-miR-4760-5p | 2 | 3.61022044 | 6.67E-06 | 0.2769914  | 0.53824363 |
| hsa-miR-410-5p  | 2 | 3.73112892 | 2.50E-06 | 0.2680154  | 0.55116279 |
| hsa-miR-494-5p  | 2 | 3.73112892 | 2.50E-06 | 0.2680154  | 0.55116279 |
| hsa-miR-8061    | 2 | 3.61022044 | 6.67E-06 | 0.2769914  | 0.53824363 |
| hsa-miR-4684-3p | 2 | 3.54074816 | 8.47E-06 | 0.28242619 | 0.55605381 |
| hsa-miR-6824-5p | 2 | 3.6750167  | 5.76E-06 | 0.27210761 | 0.53442029 |
| hsa-miR-4486    | 2 | 3.8500334  | 3.68E-06 | 0.25973801 | 0.53571429 |
| hsa-miR-6822-3p | 2 | 3.7244489  | 5.49E-06 | 0.2684961  | 0.53       |
| hsa-miR-548g-3p | 2 | 3.78790915 | 1.31E-06 | 0.26399788 | 0.54362416 |
| hsa-miR-4766-5p | 2 | 3.73112892 | 3.44E-06 | 0.2680154  | 0.53632479 |
| hsa-miR-4658    | 2 | 3.75183701 | 1.75E-06 | 0.2665361  | 0.53296703 |
| hsa-miR-6790-5p | 2 | 3.75183701 | 1.75E-06 | 0.2665361  | 0.53296703 |
| hsa-miR-6798-3p | 2 | 3.86806947 | 2.21E-06 | 0.2585269  | 0.51724138 |
| hsa-miR-6796-5p | 2 | 3.68770875 | 8.47E-06 | 0.27117109 | 0.52819549 |
| hsa-miR-7114-3p | 2 | 3.61088844 | 7.98E-06 | 0.27694015 | 0.52762431 |
| hsa-miR-1180-5p | 2 | 3.61088844 | 7.98E-06 | 0.27694015 | 0.52762431 |
| hsa-miR-3922-3p | 2 | 3.7257849  | 6.85E-06 | 0.26839982 | 0.51304348 |
| hsa-miR-7156-5p | 2 | 3.73513694 | 3.38E-06 | 0.2677278  | 0.53791469 |
| hsa-miR-1182    | 2 | 3.82264529 | 2.32E-06 | 0.26159895 | 0.54166667 |
| hsa-miR-5587-3p | 2 | 3.80193721 | 4.29E-06 | 0.26302381 | 0.51360544 |
| hsa-miR-6881-5p | 2 | 3.77321309 | 4.74E-06 | 0.26502611 | 0.51522843 |
| hsa-miR-4728-3p | 2 | 3.6002004  | 8.56E-06 | 0.27776232 | 0.54027778 |
| hsa-miR-371b-3p | 2 | 3.82331329 | 9.10E-07 | 0.26155325 | 0.52232143 |
| hsa-miR-3925-5p | 2 | 3.66232465 | 4.17E-06 | 0.27305062 | 0.5451505  |
| hsa-miR-5000-5p | 2 | 3.750501   | 6.66E-06 | 0.26663104 | 0.50454545 |
| hsa-miR-1264    | 2 | 3.74114896 | 4.54E-06 | 0.26729756 | 0.52192982 |
| hsa-miR-6842-3p | 2 | 3.7010688  | 4.22E-06 | 0.27019222 | 0.54089219 |
| hsa-miR-517-5p  | 2 | 3.85404142 | 1.01E-05 | 0.25946789 | 0.5        |
| hsa-miR-4484    | 2 | 3.80861723 | 3.38E-06 | 0.26256248 | 0.51481481 |
| hsa-miR-4258    | 2 | 3.80995324 | 2.62E-06 | 0.26247041 | 0.5        |
| KLK6 up         | 2 | 3.54241817 | 6.68E-04 | 0.28229304 | 0.5        |
| KRT16 up        | 2 | 3.8750835  | 5.70E-07 | 0.25805896 | 0.52857143 |
| KRT6B up        | 2 | 3.38343353 | 5.40E-07 | 0.29555775 | 0.57070707 |
| hsa-miR-1288-5p | 2 | 3.80728123 | 5.44E-06 | 0.26265462 | 0.50746269 |
| hsa-miR-4466    | 2 | 3.7999332  | 1.46E-06 | 0.26316252 | 0.52651515 |
| hsa-miR-942-3p  | 2 | 3.74649299 | 3.46E-06 | 0.26691629 | 0.52777778 |
| hsa-miR-6886-5p | 2 | 3.64161657 | 8.59E-06 | 0.27460332 | 0.54005525 |
| hsa-miR-378e    | 2 | 3.55344021 | 1.11E-05 | 0.28141743 | 0.5516055  |
| hsa-miR-4520-5p | 2 | 3.60354041 | 8.15E-06 | 0.27750487 | 0.55216285 |
| hsa-miR-3184-3p | 2 | 3.6743487  | 9.42E-06 | 0.27215708 | 0.50630915 |
| hsa-miR-6842-5p | 2 | 3.55344021 | 1.11E-05 | 0.28141743 | 0.5516055  |
| hsa-miR-6752-5p | 2 | 3.55344021 | 1.11E-05 | 0.28141743 | 0.5516055  |
| hsa-miR-219a-5p | 2 | 3.60420842 | 1.12E-05 | 0.27745343 | 0.51747312 |
| hsa-miR-4727-3p | 2 | 3.47261189 | 2.39E-05 | 0.28796768 | 0.53624535 |
| hsa-miR-1197    | 2 | 3.5995324  | 8.73E-06 | 0.27781386 | 0.52021563 |
| hsa-miR-6893-3p | 2 | 3.66833667 | 1.32E-05 | 0.27260311 | 0.50445104 |
| hsa-miR-7110-5p | 2 | 3.55344021 | 1.11E-05 | 0.28141743 | 0.5516055  |

|                 |   |            |          |            |            |
|-----------------|---|------------|----------|------------|------------|
| hsa-miR-4444    | 2 | 3.57949232 | 3.30E-05 | 0.27936923 | 0.50731707 |
| LNX1 down       | 2 | 3.35938544 | 1.77E-06 | 0.29767349 | 0.54918033 |
| hsa-miR-2052    | 2 | 3.76720107 | 2.10E-06 | 0.26544906 | 0.51226994 |
| hsa-miR-3117-3p | 2 | 3.77989312 | 8.32E-06 | 0.26455774 | 0.50641026 |
| hsa-miR-4802-3p | 2 | 3.80995324 | 5.90E-07 | 0.26247041 | 0.54065041 |
| hsa-miR-4749-3p | 2 | 3.88877756 | 3.60E-06 | 0.25715022 | 0.5047619  |
| hsa-miR-6756-3p | 2 | 3.9001336  | 3.59E-06 | 0.25640147 | 0.51578947 |
| hsa-miR-4522    | 2 | 3.83066132 | 3.32E-06 | 0.26105153 | 0.54545455 |
| hsa-miR-4682    | 2 | 3.57815631 | 7.34E-06 | 0.27947354 | 0.51772152 |
| hsa-miR-6072    | 2 | 3.83266533 | 3.10E-06 | 0.26091503 | 0.525      |
| hsa-miR-6891-3p | 2 | 3.83266533 | 3.10E-06 | 0.26091503 | 0.525      |
| hsa-miR-6887-3p | 2 | 3.76252505 | 3.38E-06 | 0.26577896 | 0.50828729 |
| hsa-miR-29c-5p  | 2 | 3.91015364 | 3.68E-06 | 0.25574443 | 0.50595238 |
| hsa-miR-6754-3p | 2 | 3.64295257 | 8.57E-06 | 0.27450261 | 0.51424051 |
| MAP1LC3A down   | 2 | 3.27187709 | 5.34E-06 | 0.30563495 | 0.52824859 |
| hsa-miR-6841-5p | 2 | 3.79325317 | 5.82E-06 | 0.26362596 | 0.52068966 |
| hsa-miR-6895-5p | 2 | 3.78991316 | 2.48E-06 | 0.26385829 | 0.53424658 |
| hsa-miR-1266-5p | 2 | 3.73179693 | 2.94E-06 | 0.26796742 | 0.52870813 |
| hsa-miR-4518    | 2 | 3.64362057 | 6.29E-06 | 0.27445229 | 0.54180064 |
| hsa-miR-3934-3p | 2 | 3.749833   | 3.61E-06 | 0.26667854 | 0.51197605 |
| MB down         | 2 | 3.18637275 | 4.03E-06 | 0.31383648 | 0.57352941 |
| hsa-miR-6826-3p | 2 | 3.75651303 | 6.33E-06 | 0.26620432 | 0.50867052 |
| MFAP4 down      | 2 | 3.46359385 | 6.90E-07 | 0.28871745 | 0.54255319 |
| hsa-miR-515-3p  | 2 | 3.60955244 | 4.41E-06 | 0.27704266 | 0.57162921 |
| hsa-miR-519e-3p | 2 | 3.60955244 | 4.41E-06 | 0.27704266 | 0.57162921 |
| hsa-miR-6830-5p | 2 | 3.63827655 | 1.54E-05 | 0.27485541 | 0.52155172 |
| hsa-miR-920     | 2 | 3.69171677 | 3.79E-06 | 0.27087669 | 0.52419355 |
| hsa-miR-6508-5p | 2 | 3.60621242 | 2.14E-05 | 0.27729925 | 0.50632911 |
| hsa-miR-8067    | 2 | 3.60621242 | 2.14E-05 | 0.27729925 | 0.50632911 |
| hsa-miR-5684    | 2 | 3.85671343 | 9.31E-06 | 0.25928813 | 0.5        |
| hsa-miR-2117    | 2 | 3.77054108 | 8.53E-06 | 0.26521393 | 0.50546448 |
| hsa-miR-301b-5p | 2 | 3.57815631 | 1.01E-05 | 0.27947354 | 0.53482587 |
| MYEOV down      | 2 | 3.49832999 | 7.30E-07 | 0.28585068 | 0.55555556 |
| hsa-miR-4731-3p | 2 | 3.79258517 | 2.55E-06 | 0.26367239 | 0.52058824 |
| hsa-miR-4801    | 2 | 3.79258517 | 2.55E-06 | 0.26367239 | 0.52058824 |
| hsa-miR-1266-3p | 2 | 3.67100868 | 1.57E-05 | 0.27240469 | 0.51433692 |
| hsa-miR-3145-3p | 2 | 3.66366065 | 3.18E-06 | 0.27295104 | 0.51877133 |
| NDUFA4L2 down   | 2 | 3.49365397 | 6.10E-06 | 0.28623327 | 0.50362319 |
| hsa-miR-4323    | 2 | 3.79325317 | 1.20E-05 | 0.26362596 | 0.51226994 |
| hsa-miR-4648    | 2 | 3.93553774 | 2.30E-06 | 0.25409488 | 0.52238806 |
| hsa-miR-6515-3p | 2 | 3.62291249 | 3.17E-05 | 0.27602102 | 0.50134771 |
| hsa-miR-1236-3p | 2 | 4.01636607 | 4.88E-06 | 0.24898129 | 0.5        |
| hsa-miR-6731-3p | 2 | 3.61823647 | 8.11E-06 | 0.27637773 | 0.51058201 |
| hsa-miR-3938    | 2 | 3.72845691 | 4.62E-06 | 0.26820747 | 0.51028807 |
| hsa-miR-5580-5p | 2 | 3.62892452 | 1.14E-05 | 0.27556374 | 0.50588235 |
| hsa-miR-7851-3p | 2 | 4.08383434 | 5.45E-06 | 0.24486792 | 0.5        |
| hsa-miR-3120-5p | 2 | 3.89545758 | 1.33E-05 | 0.25670925 | 0.50485437 |

|                 |   |            |          |            |            |
|-----------------|---|------------|----------|------------|------------|
| hsa-miR-6888-3p | 2 | 3.89545758 | 1.33E-05 | 0.25670925 | 0.50485437 |
| hsa-miR-4480    | 2 | 3.89412158 | 1.01E-06 | 0.25679732 | 0.54545455 |
| PDLIM2 down     | 2 | 3.28924516 | 1.18E-06 | 0.30402112 | 0.55864198 |
| hsa-miR-4680-5p | 2 | 3.86406146 | 6.61E-06 | 0.25879506 | 0.50458716 |
| PDLIM4 down     | 2 | 3.54642619 | 3.64E-06 | 0.28197401 | 0.51503759 |
| hsa-miR-6750-3p | 2 | 3.74382098 | 1.08E-05 | 0.26710679 | 0.51190476 |
| hsa-miR-6776-3p | 2 | 3.69639279 | 6.91E-06 | 0.27053402 | 0.55060729 |
| hsa-miR-3195    | 2 | 3.7999332  | 8.32E-06 | 0.26316252 | 0.50352113 |
| hsa-miR-614     | 2 | 3.53473614 | 3.03E-05 | 0.28290655 | 0.52051836 |
| hsa-miR-3607-3p | 2 | 3.75517702 | 4.51E-06 | 0.26629903 | 0.52319588 |
| hsa-miR-4532    | 2 | 3.9248497  | 9.37E-06 | 0.25478683 | 0.5        |
| hsa-miR-620     | 2 | 3.78256513 | 1.16E-06 | 0.26437086 | 0.51893939 |
| hsa-miR-431-3p  | 2 | 3.82732131 | 1.97E-06 | 0.26127934 | 0.51685393 |
| hsa-miR-4259    | 2 | 3.69706079 | 5.58E-06 | 0.27048514 | 0.5083682  |
| hsa-miR-1265    | 2 | 3.61088844 | 1.10E-05 | 0.27694015 | 0.50516796 |
| hsa-miR-632     | 2 | 3.84201737 | 1.64E-06 | 0.26027993 | 0.5245098  |
| PSCA down       | 2 | 3.47695391 | 9.20E-07 | 0.28760807 | 0.53125    |
| hsa-miR-3670    | 2 | 3.58550434 | 4.78E-06 | 0.27890079 | 0.53856041 |
| hsa-miR-3117-5p | 2 | 3.79124916 | 4.89E-06 | 0.26376531 | 0.52403846 |
| hsa-miR-487b-5p | 2 | 3.73847695 | 2.49E-06 | 0.26748861 | 0.5136612  |
| hsa-miR-487a-5p | 2 | 3.73847695 | 2.49E-06 | 0.26748861 | 0.5136612  |
| hsa-miR-431-5p  | 2 | 3.66299265 | 5.23E-06 | 0.27300082 | 0.54982818 |
| hsa-miR-5094    | 2 | 3.5260521  | 8.85E-06 | 0.2836033  | 0.54051173 |
| hsa-miR-3182    | 2 | 4.01369405 | 3.22E-06 | 0.24914704 | 0.50847458 |
| hsa-miR-4634    | 2 | 3.76519706 | 1.39E-05 | 0.26559035 | 0.51515152 |
| hsa-miR-1302    | 2 | 3.47728791 | 1.48E-05 | 0.28758044 | 0.55223881 |
| hsa-miR-4641    | 2 | 3.66366065 | 3.76E-06 | 0.27295104 | 0.55409836 |
| hsa-miR-7848-3p | 2 | 3.66633267 | 4.57E-06 | 0.27275212 | 0.5088968  |
| hsa-miR-3171    | 2 | 3.59686039 | 1.02E-05 | 0.27802024 | 0.55813953 |
| hsa-miR-8086    | 2 | 3.5487642  | 8.88E-06 | 0.28178824 | 0.58735632 |
| hsa-miR-449c-3p | 2 | 3.5487642  | 8.88E-06 | 0.28178824 | 0.58735632 |
| hsa-miR-7161-3p | 2 | 3.66032064 | 1.44E-05 | 0.27320011 | 0.50506757 |
| hsa-miR-4450    | 2 | 3.67234469 | 5.23E-06 | 0.27230559 | 0.52241379 |
| hsa-miR-4802-5p | 2 | 3.65898464 | 6.92E-06 | 0.27329986 | 0.53968254 |
| hsa-miR-6512-5p | 2 | 3.71710087 | 5.17E-06 | 0.26902687 | 0.52165354 |
| hsa-miR-3654    | 2 | 3.70641283 | 4.10E-06 | 0.26980265 | 0.52542373 |
| hsa-miR-548q    | 2 | 3.77054108 | 2.29E-06 | 0.26521393 | 0.50331126 |
| hsa-miR-367-5p  | 2 | 3.76920508 | 4.75E-06 | 0.26530793 | 0.54126214 |
| hsa-miR-4638-3p | 2 | 3.50734803 | 1.45E-05 | 0.2851157  | 0.547      |
| hsa-miR-889-5p  | 2 | 3.53340013 | 1.12E-05 | 0.28301352 | 0.54880694 |
| hsa-miR-495-5p  | 2 | 3.68637275 | 5.64E-06 | 0.27126937 | 0.55212355 |
| hsa-miR-4743-3p | 2 | 3.81329325 | 2.33E-06 | 0.26224052 | 0.51785714 |
| hsa-miR-6815-3p | 2 | 3.61623246 | 1.11E-05 | 0.27653089 | 0.52631579 |
| hsa-miR-6771-5p | 2 | 3.71710087 | 3.01E-06 | 0.26902687 | 0.51904762 |
| SFRP2 down      | 2 | 3.47628591 | 3.20E-07 | 0.28766334 | 0.56547619 |
| hsa-miR-4639-5p | 2 | 3.58216433 | 6.96E-06 | 0.27916084 | 0.53358209 |
| SH3GL3 down     | 2 | 3.67134269 | 1.22E-06 | 0.27237991 | 0.54347826 |

|                 |   |            |          |            |            |
|-----------------|---|------------|----------|------------|------------|
| hsa-miR-376a*   | 2 | 3.75985304 | 2.11E-06 | 0.26596784 | 0.51456311 |
| hsa-miR-208a-5p | 2 | 3.73313293 | 4.78E-06 | 0.26787152 | 0.51033058 |
| hsa-miR-208b-5p | 2 | 3.73313293 | 4.78E-06 | 0.26787152 | 0.51033058 |
| hsa-miR-4752    | 2 | 3.55277221 | 1.05E-05 | 0.28147034 | 0.54849138 |
| hsa-miR-6833-5p | 2 | 3.55277221 | 1.05E-05 | 0.28147034 | 0.54849138 |
| hsa-miR-6758-3p | 2 | 3.56346025 | 1.65E-05 | 0.28062611 | 0.52022472 |
| hsa-miR-5681b   | 2 | 3.54208417 | 1.92E-05 | 0.28231966 | 0.53510638 |
| hsa-miR-6826-5p | 2 | 3.43253173 | 2.19E-05 | 0.29133015 | 0.56916667 |
| SPRR2C up       | 2 | 3.87909152 | 6.68E-04 | 0.25779232 | 0.5        |
| SPRR2E up       | 2 | 3.88042752 | 1.80E-07 | 0.25770356 | 0.70588235 |
| ST3GAL4 down    | 2 | 3.30728123 | 2.17E-06 | 0.30236316 | 0.52547771 |
| hsa-miR-513b-3p | 2 | 3.61422846 | 2.61E-05 | 0.27668423 | 0.5057971  |
| TEKT4P2 down    | 2 | 3.22044088 | 1.03E-05 | 0.31051649 | 0.58119658 |
| hsa-miR-6718-5p | 2 | 3.63360053 | 4.15E-06 | 0.27520912 | 0.54205607 |
| hsa-miR-203b-5p | 2 | 3.63360053 | 4.15E-06 | 0.27520912 | 0.54205607 |
| TPT1-AS1 down   | 2 | 3.22044088 | 1.03E-05 | 0.31051649 | 0.58119658 |
| hsa-miR-4461    | 2 | 3.82197729 | 8.25E-06 | 0.26164467 | 0.50344828 |
| hsa-miR-711     | 2 | 3.60888444 | 1.10E-05 | 0.27709394 | 0.50694444 |
| hsa-miR-4800-5p | 2 | 3.60888444 | 1.10E-05 | 0.27709394 | 0.50694444 |
| hsa-miR-4427    | 2 | 3.69438878 | 2.74E-06 | 0.27068077 | 0.55415162 |
| hsa-miR-5187-3p | 2 | 3.69438878 | 2.74E-06 | 0.27068077 | 0.55415162 |
| hsa-miR-499b-3p | 2 | 3.5748163  | 4.69E-06 | 0.27973465 | 0.5382716  |
| hsa-miR-6854-5p | 2 | 3.60220441 | 7.46E-06 | 0.27760779 | 0.52452316 |
| hsa-miR-4312    | 2 | 3.58817635 | 1.24E-05 | 0.2786931  | 0.54947917 |
| ZNF812 up       | 2 | 3.51503006 | 1.90E-07 | 0.28449259 | 0.72727273 |
| hsa-miR-5009-5p | 1 | 3.7999332  | 0        | 0.26316252 | 0          |
| hsa-miR-4493    | 1 | 3.96092184 | 0        | 0.25246648 | 0          |
| hsa-miR-4694-5p | 1 | 3.96092184 | 0        | 0.25246648 | 0          |
| ADSSL1 down     | 1 | 3.57982632 | 0        | 0.27934316 | 0          |
| hsa-miR-6820-5p | 1 | 3.85871743 | 0        | 0.25915347 | 0          |
| hsa-miR-6069    | 1 | 3.85871743 | 0        | 0.25915347 | 0          |
| hsa-miR-892c-3p | 1 | 4.06379426 | 0        | 0.24607545 | 0          |
| hsa-miR-4676-3p | 1 | 4.06379426 | 0        | 0.24607545 | 0          |
| ALDH3A1 down    | 1 | 3.70340681 | 0        | 0.27002165 | 0          |
| hsa-miR-6716-5p | 1 | 3.81529726 | 0        | 0.26210278 | 0          |
| hsa-miR-3620-3p | 1 | 3.81529726 | 0        | 0.26210278 | 0          |
| ANGPTL1 down    | 1 | 4.88977956 | 0        | 0.2045082  | 0          |
| ANKRD20A1down   | 1 | 3.57982632 | 0        | 0.27934316 | 0          |
| hsa-miR-3677-3p | 1 | 4.01503006 | 0        | 0.24906414 | 0          |
| hsa-miR-1274b   | 1 | 4.09719439 | 0        | 0.24406945 | 0          |
| hsa-miR-1908-3p | 1 | 4.0504342  | 0        | 0.24688711 | 0          |
| ARSI down       | 1 | 3.57982632 | 0        | 0.27934316 | 0          |
| hsa-miR-337-5p  | 1 | 3.81462926 | 0        | 0.26214867 | 0          |
| ATP6V1C2 down   | 1 | 3.83233133 | 0        | 0.26093777 | 0          |
| B3GNT8 down     | 1 | 3.57982632 | 0        | 0.27934316 | 0          |
| hsa-miR-4297    | 1 | 3.80661323 | 0        | 0.26270071 | 0          |
| hsa-miR-4778-5p | 1 | 3.80661323 | 0        | 0.26270071 | 0          |



|                 |   |            |   |            |   |
|-----------------|---|------------|---|------------|---|
| hsa-miR-6080    | 1 | 4.20207081 | 0 | 0.2379779  | 0 |
| hsa-miR-6874-3p | 1 | 4.28623914 | 0 | 0.23330476 | 0 |
| C10orf99 up     | 1 | 3.57982632 | 0 | 0.27934316 | 0 |
| C11orf96 down   | 1 | 3.77287909 | 0 | 0.26504958 | 0 |
| hsa-miR-718     | 1 | 4.33099532 | 0 | 0.23089381 | 0 |
| hsa-miR-6889-3p | 1 | 4.04776219 | 0 | 0.24705009 | 0 |
| hsa-miR-3197    | 1 | 3.93820975 | 0 | 0.25392248 | 0 |
| hsa-miR-4327    | 1 | 3.93820975 | 0 | 0.25392248 | 0 |
| hsa-miR-6071    | 1 | 3.93820975 | 0 | 0.25392248 | 0 |
| hsa-miR-24      | 1 | 3.86406146 | 0 | 0.25879506 | 0 |
| hsa-miR-6764-3p | 1 | 3.59285237 | 0 | 0.27833039 | 0 |
| hsa-miR-6824-3p | 1 | 3.59285237 | 0 | 0.27833039 | 0 |
| hsa-miR-302c    | 1 | 3.59285237 | 0 | 0.27833039 | 0 |
| hsa-miR-758-5p  | 1 | 3.59285237 | 0 | 0.27833039 | 0 |
| hsa-miR-8066    | 1 | 3.59285237 | 0 | 0.27833039 | 0 |
| hsa-miR-15a     | 1 | 3.59285237 | 0 | 0.27833039 | 0 |
| hsa-miR-6735-3p | 1 | 3.59285237 | 0 | 0.27833039 | 0 |
| hsa-miR-3135a   | 1 | 3.59285237 | 0 | 0.27833039 | 0 |
| hsa-miR-503     | 1 | 3.59285237 | 0 | 0.27833039 | 0 |
| hsa-miR-155     | 1 | 3.59285237 | 0 | 0.27833039 | 0 |
| hsa-miR-20a     | 1 | 3.59285237 | 0 | 0.27833039 | 0 |
| hsa-miR-4804-3p | 1 | 3.59285237 | 0 | 0.27833039 | 0 |
| hsa-miR-3648    | 1 | 3.59285237 | 0 | 0.27833039 | 0 |
| hsa-miR-17      | 1 | 3.59285237 | 0 | 0.27833039 | 0 |
| has-miR-16      | 1 | 3.59285237 | 0 | 0.27833039 | 0 |
| hsa-miR-424     | 1 | 3.59285237 | 0 | 0.27833039 | 0 |
| hsa-let-7b      | 1 | 3.59285237 | 0 | 0.27833039 | 0 |
| has-miR-15a     | 1 | 3.59285237 | 0 | 0.27833039 | 0 |
| hsa-miR-195     | 1 | 3.59285237 | 0 | 0.27833039 | 0 |
| hsa-miR-302a    | 1 | 3.59285237 | 0 | 0.27833039 | 0 |
| hsa-miR-34a     | 1 | 3.59285237 | 0 | 0.27833039 | 0 |
| miR-16-1        | 1 | 3.59285237 | 0 | 0.27833039 | 0 |
| hsa-miR-3155a   | 1 | 3.85136941 | 0 | 0.25964791 | 0 |
| hsa-miR-3155b   | 1 | 3.85136941 | 0 | 0.25964791 | 0 |
| hsa-miR-5694    | 1 | 3.85136941 | 0 | 0.25964791 | 0 |
| hsa-miR-4497    | 1 | 3.85136941 | 0 | 0.25964791 | 0 |
| hsa-miR-5739    | 1 | 4.63760855 | 0 | 0.21562838 | 0 |
| hsa-miR-5187-5p | 1 | 3.89746159 | 0 | 0.25657726 | 0 |
| CEACAM1 up      | 1 | 3.59585838 | 0 | 0.27809772 | 0 |
| CES1 down       | 1 | 3.94589178 | 0 | 0.25342814 | 0 |
| CHI3L1 up       | 1 | 4.04275217 | 0 | 0.24735625 | 0 |
| CHMP4C down     | 1 | 3.80494322 | 0 | 0.26281601 | 0 |
| CIART down      | 1 | 3.76619906 | 0 | 0.26551969 | 0 |
| hsa-miR-6838-3p | 1 | 3.9008016  | 0 | 0.25635756 | 0 |
| hsa-miR-4717-5p | 1 | 3.9008016  | 0 | 0.25635756 | 0 |
| hsa-miR-892a    | 1 | 3.8754175  | 0 | 0.25803671 | 0 |
| COMP down       | 1 | 4.40280561 | 0 | 0.2271279  | 0 |

|                  |   |            |   |            |   |
|------------------|---|------------|---|------------|---|
| hsa-miR-4677-5p  | 1 | 3.94355377 | 0 | 0.25357839 | 0 |
| CRISP3 down      | 1 | 4.15831663 | 0 | 0.24048193 | 0 |
| CRNN down        | 1 | 3.57982632 | 0 | 0.27934316 | 0 |
| hsa-miR-569      | 1 | 4.79792919 | 0 | 0.20842325 | 0 |
| hsa-miR-19b      | 1 | 3.85404142 | 0 | 0.25946789 | 0 |
| hsa-miR-4699-3p  | 1 | 3.85404142 | 0 | 0.25946789 | 0 |
| hsa-miR-2681-3p  | 1 | 4.248831   | 0 | 0.23535886 | 0 |
| hsa-miR-1247-5p  | 1 | 3.91416166 | 0 | 0.25548255 | 0 |
| CYSRT1 down      | 1 | 3.35871743 | 0 | 0.2977327  | 0 |
| hsa-miR-4729     | 1 | 3.85470942 | 0 | 0.25942293 | 0 |
| hsa-miR-5571-3p  | 1 | 4.26352705 | 0 | 0.23454759 | 0 |
| hsa-miR-7975     | 1 | 4.26352705 | 0 | 0.23454759 | 0 |
| hsa-miR-6880-3p  | 1 | 4.26553106 | 0 | 0.2344374  | 0 |
| hsa-miR-6806-5p  | 1 | 3.84134937 | 0 | 0.26032519 | 0 |
| hsa-miR-4642     | 1 | 3.87207749 | 0 | 0.25825929 | 0 |
| hsa-miR-5002-3p  | 1 | 3.87207749 | 0 | 0.25825929 | 0 |
| hsa-miR-433-5p   | 1 | 4.01369405 | 0 | 0.24914704 | 0 |
| hsa-miR-4785     | 1 | 4.18871075 | 0 | 0.23873694 | 0 |
| hsa-miR-3680-5p  | 1 | 3.96492986 | 0 | 0.25221127 | 0 |
| FETUB down       | 1 | 3.73146293 | 0 | 0.26799141 | 0 |
| hsa-miR-1292-3p  | 1 | 3.85136941 | 0 | 0.25964791 | 0 |
| hsa-miR-602      | 1 | 3.84335337 | 0 | 0.26018945 | 0 |
| hsa-miR-6877-5p  | 1 | 3.91282565 | 0 | 0.25556978 | 0 |
| hsa-miR-4740-3p  | 1 | 3.98964596 | 0 | 0.25064881 | 0 |
| hsa-miR-8087     | 1 | 4.32164329 | 0 | 0.23139346 | 0 |
| hsa-miR-548u     | 1 | 4.32164329 | 0 | 0.23139346 | 0 |
| hsa-miR-7161-5p  | 1 | 4.32164329 | 0 | 0.23139346 | 0 |
| hsa-miR-1273g-5p | 1 | 3.81796927 | 0 | 0.26191934 | 0 |
| hsa-miR-3140-5p  | 1 | 3.81796927 | 0 | 0.26191934 | 0 |
| hsa-miR-6782-5p  | 1 | 3.81796927 | 0 | 0.26191934 | 0 |
| hsa-miR-7158-5p  | 1 | 3.81796927 | 0 | 0.26191934 | 0 |
| hsa-miR-6828-3p  | 1 | 3.90814963 | 0 | 0.25587557 | 0 |
| hsa-miR-103b     | 1 | 3.90814963 | 0 | 0.25587557 | 0 |
| hsa-miR-6876-3p  | 1 | 3.9001336  | 0 | 0.25640147 | 0 |
| hsa-miR-6789-5p  | 1 | 3.79525718 | 0 | 0.26348676 | 0 |
| hsa-miR-4278     | 1 | 3.79525718 | 0 | 0.26348676 | 0 |
| hsa-miR-2909     | 1 | 3.79525718 | 0 | 0.26348676 | 0 |
| hsa-miR-6503-5p  | 1 | 4.001002   | 0 | 0.24993739 | 0 |
| hsa-miR-4527     | 1 | 4.001002   | 0 | 0.24993739 | 0 |
| HSF4 down        | 1 | 3.56379426 | 0 | 0.28059981 | 0 |
| hsa-miR-8088     | 1 | 4.14261857 | 0 | 0.24139321 | 0 |
| hsa-miR-7849-3p  | 1 | 3.81596526 | 0 | 0.26205689 | 0 |
| hsa-miR-6759-5p  | 1 | 3.81596526 | 0 | 0.26205689 | 0 |
| hsa-miR-6082     | 1 | 3.81596526 | 0 | 0.26205689 | 0 |
| hsa-miR-551a     | 1 | 3.9255177  | 0 | 0.25474347 | 0 |
| hsa-miR-551b-3p  | 1 | 3.9255177  | 0 | 0.25474347 | 0 |
| hsa-miR-4704-3p  | 1 | 3.9255177  | 0 | 0.25474347 | 0 |

|                   |   |            |   |            |   |
|-------------------|---|------------|---|------------|---|
| hsa-miR-6784-5p   | 1 | 4.00901804 | 0 | 0.24943764 | 0 |
| hsa-miR-6078      | 1 | 3.8754175  | 0 | 0.25803671 | 0 |
| hsa-miR-6763-3p   | 1 | 3.8754175  | 0 | 0.25803671 | 0 |
| hsa-miR-4633-5p   | 1 | 3.7752171  | 0 | 0.26488543 | 0 |
| hsa-miR-5705      | 1 | 3.7752171  | 0 | 0.26488543 | 0 |
| IGFBP6 down       | 1 | 3.72277889 | 0 | 0.26861654 | 0 |
| IGFL2 down        | 1 | 3.90313961 | 0 | 0.256204   | 0 |
| hsa-miR-3687      | 1 | 4.3490314  | 0 | 0.22993626 | 0 |
| IL34 down         | 1 | 4.24315297 | 0 | 0.2356738  | 0 |
| IL36G up          | 1 | 3.91048764 | 0 | 0.25572258 | 0 |
| hsa-miR-3682-3p   | 1 | 3.86940548 | 0 | 0.25843763 | 0 |
| hsa-miR-6797-3p   | 1 | 4.06579826 | 0 | 0.24595416 | 0 |
| hsa-miR-6076      | 1 | 4.06579826 | 0 | 0.24595416 | 0 |
| hsa-miR-3162-5p   | 1 | 3.89679359 | 0 | 0.25662124 | 0 |
| hsa-miR-6075      | 1 | 3.89679359 | 0 | 0.25662124 | 0 |
| hsa-miR-1251-5p   | 1 | 3.89679359 | 0 | 0.25662124 | 0 |
| KLK5 up           | 1 | 3.47762191 | 0 | 0.28755282 | 0 |
| hsa-let-7f        | 1 | 4.54208417 | 0 | 0.22016325 | 0 |
| KLK7 up           | 1 | 3.57982632 | 0 | 0.27934316 | 0 |
| KLK9 up           | 1 | 4.69539078 | 0 | 0.21297482 | 0 |
| hsa-miR-5584-3p   | 1 | 3.81730127 | 0 | 0.26196518 | 0 |
| KRT3 down         | 1 | 3.61122244 | 0 | 0.27691454 | 0 |
| KRT6C up          | 1 | 4.19639279 | 0 | 0.2382999  | 0 |
| has-miR-199a*     | 1 | 4.1239145  | 0 | 0.24248805 | 0 |
| hsa-miR-30a       | 1 | 4.1239145  | 0 | 0.24248805 | 0 |
| hsa-miR-4520-2-3p | 1 | 3.99031396 | 0 | 0.25060685 | 0 |
| hsa-miR-4529-3p   | 1 | 3.99031396 | 0 | 0.25060685 | 0 |
| hsa-miR-4776-5p   | 1 | 3.99031396 | 0 | 0.25060685 | 0 |
| hsa-miR-4535      | 1 | 3.99031396 | 0 | 0.25060685 | 0 |
| hsa-miR-424*      | 1 | 4.06446226 | 0 | 0.24603501 | 0 |
| LGALS9B up        | 1 | 3.57982632 | 0 | 0.27934316 | 0 |
| LGALS9C up        | 1 | 3.57982632 | 0 | 0.27934316 | 0 |
| hsa-miR-4671-5p   | 1 | 3.70641283 | 0 | 0.26980265 | 0 |
| hsa-miR-5090      | 1 | 3.70641283 | 0 | 0.26980265 | 0 |
| hsa-miR-6882-3p   | 1 | 3.70641283 | 0 | 0.26980265 | 0 |
| hsa-miR-6786-3p   | 1 | 3.70641283 | 0 | 0.26980265 | 0 |
| hsa-miR-1269a     | 1 | 3.70641283 | 0 | 0.26980265 | 0 |
| hsa-miR-6775-5p   | 1 | 3.70641283 | 0 | 0.26980265 | 0 |
| hsa-miR-4467      | 1 | 3.70641283 | 0 | 0.26980265 | 0 |
| hsa-miR-378h      | 1 | 3.70641283 | 0 | 0.26980265 | 0 |
| hsa-miR-4650-5p   | 1 | 3.70641283 | 0 | 0.26980265 | 0 |
| LOC728392 down    | 1 | 4.25918504 | 0 | 0.2347867  | 0 |
| hsa-miR-1-5p      | 1 | 3.84602538 | 0 | 0.26000868 | 0 |
| hsa-miR-4707-3p   | 1 | 3.88677355 | 0 | 0.2572828  | 0 |
| hsa-miR-4783-3p   | 1 | 3.88677355 | 0 | 0.2572828  | 0 |
| hsa-miR-6768-3p   | 1 | 4.00901804 | 0 | 0.24943764 | 0 |
| hsa-miR-3935      | 1 | 4.00901804 | 0 | 0.24943764 | 0 |

|                 |   |            |   |            |   |
|-----------------|---|------------|---|------------|---|
| hsa-miR-4509    | 1 | 3.89412158 | 0 | 0.25679732 | 0 |
| hsa-miR-523-3p  | 1 | 3.98764195 | 0 | 0.25077477 | 0 |
| hsa-miR-3621    | 1 | 3.98764195 | 0 | 0.25077477 | 0 |
| hsa-miR-6125    | 1 | 3.98764195 | 0 | 0.25077477 | 0 |
| LTC4S down      | 1 | 3.57982632 | 0 | 0.27934316 | 0 |
| hsa-miR-6837-3p | 1 | 4.02371409 | 0 | 0.2485266  | 0 |
| LYPD2 down      | 1 | 3.3987976  | 0 | 0.2942217  | 0 |
| MACROD1 down    | 1 | 3.9512358  | 0 | 0.25308538 | 0 |
| MAL down        | 1 | 3.6506346  | 0 | 0.27392498 | 0 |
| hsa-miR-7160-3p | 1 | 3.82130929 | 0 | 0.26169041 | 0 |
| hsa-miR-4512    | 1 | 3.82130929 | 0 | 0.26169041 | 0 |
| hsa-miR-5007-3p | 1 | 3.96626587 | 0 | 0.25212632 | 0 |
| hsa-miR-1229-5p | 1 | 4.05310621 | 0 | 0.24672435 | 0 |
| hsa-miR-4329    | 1 | 3.97361389 | 0 | 0.25166008 | 0 |
| hsa-miR-4763-5p | 1 | 3.78189713 | 0 | 0.26441756 | 0 |
| hsa-miR-4699-5p | 1 | 3.78189713 | 0 | 0.26441756 | 0 |
| hsa-miR-4300    | 1 | 3.80394122 | 0 | 0.26288524 | 0 |
| hsa-miR-5591-5p | 1 | 3.80394122 | 0 | 0.26288524 | 0 |
| hsa-miR-6726-5p | 1 | 3.80394122 | 0 | 0.26288524 | 0 |
| hsa-miR-6800-5p | 1 | 3.80394122 | 0 | 0.26288524 | 0 |
| hsa-miR-664b-5p | 1 | 3.80394122 | 0 | 0.26288524 | 0 |
| hsa-miR-553     | 1 | 4.08917836 | 0 | 0.2445479  | 0 |
| hsa-miR-6823-5p | 1 | 4.08917836 | 0 | 0.2445479  | 0 |
| hsa-miR-4760-3p | 1 | 3.97895792 | 0 | 0.25132209 | 0 |
| hsa-miR-5701    | 1 | 4.19405478 | 0 | 0.23843275 | 0 |
| hsa-miR-4661-3p | 1 | 4.19405478 | 0 | 0.23843275 | 0 |
| hsa-miR-4653-5p | 1 | 3.90881764 | 0 | 0.25583184 | 0 |
| hsa-miR-4449    | 1 | 3.90881764 | 0 | 0.25583184 | 0 |
| hsa-miR-4711-5p | 1 | 3.90881764 | 0 | 0.25583184 | 0 |
| hsa-miR-3921    | 1 | 3.90881764 | 0 | 0.25583184 | 0 |
| hsa-miR-6807-3p | 1 | 3.90881764 | 0 | 0.25583184 | 0 |
| hsa-miR-7106-3p | 1 | 3.91683367 | 0 | 0.25530826 | 0 |
| MYBPH up        | 1 | 3.57982632 | 0 | 0.27934316 | 0 |
| hsa-miR-7852-3p | 1 | 3.96092184 | 0 | 0.25246648 | 0 |
| MYOZ1 down      | 1 | 3.8243153  | 0 | 0.26148472 | 0 |
| hsa-miR-4777-3p | 1 | 3.78456914 | 0 | 0.26423087 | 0 |
| hsa-miR-4273    | 1 | 3.78456914 | 0 | 0.26423087 | 0 |
| hsa-miR-3682-5p | 1 | 3.78456914 | 0 | 0.26423087 | 0 |
| hsa-miR-6767-5p | 1 | 3.78456914 | 0 | 0.26423087 | 0 |
| NCCRP1 down     | 1 | 3.47762191 | 0 | 0.28755282 | 0 |
| hsa-miR-3651    | 1 | 4.23547094 | 0 | 0.23610125 | 0 |
| hsa-miR-449b-3p | 1 | 4.10788243 | 0 | 0.24343443 | 0 |
| hsa-miR-3141    | 1 | 4.01035404 | 0 | 0.24935454 | 0 |
| hsa-miR-4665-3p | 1 | 4.01035404 | 0 | 0.24935454 | 0 |
| OBFC1 down      | 1 | 3.35871743 | 0 | 0.2977327  | 0 |
| OLFM2 down      | 1 | 4.43887776 | 0 | 0.22528217 | 0 |
| hsa-miR-6777-3p | 1 | 4.06312625 | 0 | 0.24611591 | 0 |

|                   |   |            |   |            |   |
|-------------------|---|------------|---|------------|---|
| hsa-miR-122       | 1 | 3.90213761 | 0 | 0.25626979 | 0 |
| hsa-miR-6760-3p   | 1 | 3.90213761 | 0 | 0.25626979 | 0 |
| hsa-miR-1208      | 1 | 3.90213761 | 0 | 0.25626979 | 0 |
| hsa-miR-4420      | 1 | 3.90213761 | 0 | 0.25626979 | 0 |
| hsa-miR-181b-2-3p | 1 | 3.90213761 | 0 | 0.25626979 | 0 |
| hsa-miR-7158-3p   | 1 | 4.15263861 | 0 | 0.24081075 | 0 |
| hsa-miR-6813-3p   | 1 | 4.15263861 | 0 | 0.24081075 | 0 |
| hsa-miR-433-3p    | 1 | 4.15263861 | 0 | 0.24081075 | 0 |
| hsa-miR-6782-3p   | 1 | 3.84468938 | 0 | 0.26009904 | 0 |
| hsa-miR-5004-3p   | 1 | 3.84468938 | 0 | 0.26009904 | 0 |
| hsa-miR-4479      | 1 | 3.84468938 | 0 | 0.26009904 | 0 |
| hsa-miR-2277-5p   | 1 | 3.84468938 | 0 | 0.26009904 | 0 |
| hsa-miR-1539      | 1 | 3.84468938 | 0 | 0.26009904 | 0 |
| hsa-miR-3617-3p   | 1 | 3.85871743 | 0 | 0.25915347 | 0 |
| hsa-miR-6081      | 1 | 4.00434202 | 0 | 0.24972892 | 0 |
| PI16 down         | 1 | 3.9512358  | 0 | 0.25308538 | 0 |
| hsa-miR-8078      | 1 | 3.9241817  | 0 | 0.2548302  | 0 |
| hsa-miR-4256      | 1 | 4.70975284 | 0 | 0.21232537 | 0 |
| hsa-miR-514b-5p   | 1 | 4.70975284 | 0 | 0.21232537 | 0 |
| hsa-miR-598-5p    | 1 | 4.13527054 | 0 | 0.24182215 | 0 |
| hsa-miR-6772-5p   | 1 | 4.13527054 | 0 | 0.24182215 | 0 |
| hsa-miR-3920      | 1 | 4.13527054 | 0 | 0.24182215 | 0 |
| hsa-miR-193b      | 1 | 3.99432198 | 0 | 0.25035538 | 0 |
| hsa-miR-23b       | 1 | 3.99432198 | 0 | 0.25035538 | 0 |
| PLIN4 down        | 1 | 3.57982632 | 0 | 0.27934316 | 0 |
| hsa-miR-100       | 1 | 3.88610554 | 0 | 0.25732703 | 0 |
| hsa-miR-886-3p    | 1 | 3.88610554 | 0 | 0.25732703 | 0 |
| hsa-miR-2276-3p   | 1 | 3.88610554 | 0 | 0.25732703 | 0 |
| hsa-miR-4274      | 1 | 3.9261857  | 0 | 0.25470013 | 0 |
| hsa-miR-1282      | 1 | 3.99832999 | 0 | 0.25010442 | 0 |
| PPOX down         | 1 | 3.51503006 | 0 | 0.28449259 | 0 |
| PPP1R1B down      | 1 | 3.47762191 | 0 | 0.28755282 | 0 |
| hsa-let-7a        | 1 | 3.8987976  | 0 | 0.25648933 | 0 |
| hsa-miR-9         | 1 | 3.8987976  | 0 | 0.25648933 | 0 |
| hsa-miR-1286      | 1 | 4.05444222 | 0 | 0.24664305 | 0 |
| hsa-miR-518f-3p   | 1 | 4.03507014 | 0 | 0.24782717 | 0 |
| hsa-miR-371a-3p   | 1 | 4.03507014 | 0 | 0.24782717 | 0 |
| hsa-miR-6774-5p   | 1 | 3.91015364 | 0 | 0.25574443 | 0 |
| hsa-miR-4664-3p   | 1 | 3.95758183 | 0 | 0.25267955 | 0 |
| hsa-miR-6786-5p   | 1 | 3.95758183 | 0 | 0.25267955 | 0 |
| PTGDS down        | 1 | 3.57982632 | 0 | 0.27934316 | 0 |
| hsa-miR-3912-3p   | 1 | 3.85404142 | 0 | 0.25946789 | 0 |
| hsa-miR-521       | 1 | 3.85404142 | 0 | 0.25946789 | 0 |
| hsa-miR-6834-3p   | 1 | 4.02371409 | 0 | 0.2485266  | 0 |
| hsa-miR-591       | 1 | 3.94288577 | 0 | 0.25362135 | 0 |
| RARRES2 down      | 1 | 3.57982632 | 0 | 0.27934316 | 0 |
| RARRES3 down      | 1 | 3.80494322 | 0 | 0.26281601 | 0 |

|                  |   |            |   |            |   |
|------------------|---|------------|---|------------|---|
| hsa-miR-3150b-5p | 1 | 4.0497662  | 0 | 0.24692784 | 0 |
| hsa-miR-3150a-5p | 1 | 4.0497662  | 0 | 0.24692784 | 0 |
| hsa-miR-611      | 1 | 4.0497662  | 0 | 0.24692784 | 0 |
| hsa-miR-3131     | 1 | 4.0497662  | 0 | 0.24692784 | 0 |
| hsa-miR-3911     | 1 | 3.95424182 | 0 | 0.25289298 | 0 |
| hsa-miR-548av-3p | 1 | 3.77722111 | 0 | 0.26474489 | 0 |
| hsa-miR-549a     | 1 | 3.77722111 | 0 | 0.26474489 | 0 |
| RNASE7 down      | 1 | 3.91048764 | 0 | 0.25572258 | 0 |
| hsa-miR-92b-5p   | 1 | 4.02839011 | 0 | 0.24823812 | 0 |
| hsa-miR-1279     | 1 | 4.1993988  | 0 | 0.23812932 | 0 |
| hsa-miR-579-5p   | 1 | 4.1993988  | 0 | 0.23812932 | 0 |
| hsa-miR-4750-3p  | 1 | 3.7251169  | 0 | 0.26844795 | 0 |
| hsa-miR-1277-3p  | 1 | 3.7251169  | 0 | 0.26844795 | 0 |
| hsa-miR-208a-3p  | 1 | 4.12925852 | 0 | 0.24217423 | 0 |
| hsa-miR-208b-3p  | 1 | 4.12925852 | 0 | 0.24217423 | 0 |
| hsa-miR-6795-3p  | 1 | 3.81195725 | 0 | 0.26233243 | 0 |
| hsa-miR-6773-5p  | 1 | 4.06446226 | 0 | 0.24603501 | 0 |
| hsa-miR-6724-5p  | 1 | 4.06446226 | 0 | 0.24603501 | 0 |
| S100A7 up        | 1 | 3.56379426 | 0 | 0.28059981 | 0 |
| hsa-miR-369-5p   | 1 | 4.03239813 | 0 | 0.24799139 | 0 |
| SCARA5 down      | 1 | 3.57982632 | 0 | 0.27934316 | 0 |
| hsa-miR-4734     | 1 | 4.0511022  | 0 | 0.2468464  | 0 |
| hsa-miR-4299     | 1 | 4.40313961 | 0 | 0.22711067 | 0 |
| SCNN1D up        | 1 | 3.57982632 | 0 | 0.27934316 | 0 |
| hsa-miR-6835-5p  | 1 | 3.75517702 | 0 | 0.26629903 | 0 |
| hsa-miR-4520-3p  | 1 | 3.75517702 | 0 | 0.26629903 | 0 |
| hsa-miR-4281     | 1 | 3.73847695 | 0 | 0.26748861 | 0 |
| hsa-miR-3939     | 1 | 3.80661323 | 0 | 0.26270071 | 0 |
| hsa-miR-890      | 1 | 3.83400134 | 0 | 0.26082411 | 0 |
| hsa-miR-3972     | 1 | 3.83400134 | 0 | 0.26082411 | 0 |
| hsa-miR-7154-5p  | 1 | 3.83400134 | 0 | 0.26082411 | 0 |
| hsa-miR-6074     | 1 | 3.83400134 | 0 | 0.26082411 | 0 |
| hsa-let-7d-3p    | 1 | 3.83400134 | 0 | 0.26082411 | 0 |
| hsa-miR-5588-3p  | 1 | 3.89612558 | 0 | 0.25666524 | 0 |
| hsa-miR-4798-3p  | 1 | 3.89612558 | 0 | 0.25666524 | 0 |
| hsa-miR-4463     | 1 | 3.91215765 | 0 | 0.25561342 | 0 |
| hsa-miR-4783-5p  | 1 | 4.07915832 | 0 | 0.24514861 | 0 |
| hsa-miR-525-3p   | 1 | 4.04308617 | 0 | 0.24733581 | 0 |
| SNHG17 up        | 1 | 3.56379426 | 0 | 0.28059981 | 0 |
| SNX21 down       | 1 | 4.08016032 | 0 | 0.24508841 | 0 |
| hsa-miR-203      | 1 | 3.93086172 | 0 | 0.25439715 | 0 |
| hsa-miR-4298     | 1 | 3.63159653 | 0 | 0.27536099 | 0 |
| hsa-miR-4482-3p  | 1 | 3.63159653 | 0 | 0.27536099 | 0 |
| hsa-miR-6892-5p  | 1 | 3.63159653 | 0 | 0.27536099 | 0 |
| hsa-miR-4657     | 1 | 3.63159653 | 0 | 0.27536099 | 0 |
| hsa-miR-5591-3p  | 1 | 3.63159653 | 0 | 0.27536099 | 0 |
| hsa-miR-4433b-5p | 1 | 3.63159653 | 0 | 0.27536099 | 0 |

|                 |   |            |   |            |   |
|-----------------|---|------------|---|------------|---|
| hsa-miR-7159-3p | 1 | 3.63159653 | 0 | 0.27536099 | 0 |
| hsa-miR-598-3p  | 1 | 3.63159653 | 0 | 0.27536099 | 0 |
| hsa-miR-6861-3p | 1 | 3.63159653 | 0 | 0.27536099 | 0 |
| hsa-miR-3914    | 1 | 3.63159653 | 0 | 0.27536099 | 0 |
| hsa-miR-5192    | 1 | 3.63159653 | 0 | 0.27536099 | 0 |
| hsa-miR-6804-3p | 1 | 3.63159653 | 0 | 0.27536099 | 0 |
| hsa-miR-4445-3p | 1 | 3.63159653 | 0 | 0.27536099 | 0 |
| hsa-miR-4646-3p | 1 | 3.63159653 | 0 | 0.27536099 | 0 |
| SOD3 down       | 1 | 3.65731463 | 0 | 0.27342466 | 0 |
| SPINK5 down     | 1 | 3.57982632 | 0 | 0.27934316 | 0 |
| SPINK7 down     | 1 | 3.57982632 | 0 | 0.27934316 | 0 |
| hsa-miR-196a    | 1 | 4.87875752 | 0 | 0.20497022 | 0 |
| SPRR2G up       | 1 | 3.57982632 | 0 | 0.27934316 | 0 |
| SPRR3 down      | 1 | 3.57982632 | 0 | 0.27934316 | 0 |
| SPSB3 down      | 1 | 3.35871743 | 0 | 0.2977327  | 0 |
| STEAP1 up       | 1 | 3.70340681 | 0 | 0.27002165 | 0 |
| hsa-miR-6727-5p | 1 | 3.97962592 | 0 | 0.2512799  | 0 |
| hsa-miR-4759    | 1 | 3.97962592 | 0 | 0.2512799  | 0 |
| hsa-miR-1228-5p | 1 | 3.97962592 | 0 | 0.2512799  | 0 |
| hsa-miR-191-3p  | 1 | 3.9756179  | 0 | 0.25153323 | 0 |
| hsa-miR-4655-5p | 1 | 3.73847695 | 0 | 0.26748861 | 0 |
| hsa-miR-30a*    | 1 | 3.73847695 | 0 | 0.26748861 | 0 |
| hsa-miR-4637    | 1 | 3.73847695 | 0 | 0.26748861 | 0 |
| hsa-miR-619-3p  | 1 | 3.83333333 | 0 | 0.26086957 | 0 |
| hsa-miR-21      | 1 | 3.88944556 | 0 | 0.25710605 | 0 |
| hsa-miR-181b    | 1 | 3.88944556 | 0 | 0.25710605 | 0 |
| hsa-miR-520f-5p | 1 | 3.90414162 | 0 | 0.25613825 | 0 |
| hsa-miR-586     | 1 | 3.89612558 | 0 | 0.25666524 | 0 |
| hsa-miR-4640-3p | 1 | 3.89612558 | 0 | 0.25666524 | 0 |
| TMPRSS11E down  | 1 | 3.56379426 | 0 | 0.28059981 | 0 |
| hsa-miR-3137    | 1 | 3.82665331 | 0 | 0.26132495 | 0 |
| TNFRSF18 up     | 1 | 4.15831663 | 0 | 0.24048193 | 0 |
| TNNT2 down      | 1 | 3.57982632 | 0 | 0.27934316 | 0 |
| hsa-miR-126     | 1 | 4.00367401 | 0 | 0.24977058 | 0 |
| hsa-mir-877     | 1 | 3.96025384 | 0 | 0.25250907 | 0 |
| hsa-miR-3667-5p | 1 | 3.93152973 | 0 | 0.25435392 | 0 |
| hsa-miR-4743-5p | 1 | 4.03039412 | 0 | 0.24811469 | 0 |
| hsa-miR-7114-5p | 1 | 3.98830995 | 0 | 0.25073277 | 0 |
| hsa-miR-4477b   | 1 | 3.75183701 | 0 | 0.2665361  | 0 |
| hsa-miR-4315    | 1 | 3.75183701 | 0 | 0.2665361  | 0 |
| hsa-miR-4771    | 1 | 3.75183701 | 0 | 0.2665361  | 0 |
| hsa-miR-4790-5p | 1 | 3.75183701 | 0 | 0.2665361  | 0 |
| hsa-miR-3605-3p | 1 | 4.01102204 | 0 | 0.24931302 | 0 |
| hsa-miR-6732-5p | 1 | 3.64629259 | 0 | 0.27425117 | 0 |
| hsa-miR-4687-3p | 1 | 3.64629259 | 0 | 0.27425117 | 0 |
| hsa-miR-6868-5p | 1 | 3.64629259 | 0 | 0.27425117 | 0 |
| hsa-miR-4539    | 1 | 3.64629259 | 0 | 0.27425117 | 0 |

|                   |   |            |   |            |   |
|-------------------|---|------------|---|------------|---|
| hsa-miR-1537-5p   | 1 | 3.64629259 | 0 | 0.27425117 | 0 |
| hsa-miR-4717-3p   | 1 | 3.64629259 | 0 | 0.27425117 | 0 |
| hsa-miR-4304      | 1 | 3.64629259 | 0 | 0.27425117 | 0 |
| hsa-miR-128       | 1 | 3.64629259 | 0 | 0.27425117 | 0 |
| TYMP up           | 1 | 3.58917836 | 0 | 0.2786153  | 0 |
| hsa-miR-6505-3p   | 1 | 3.89478958 | 0 | 0.25675328 | 0 |
| hsa-miR-1178-3p   | 1 | 4.16533066 | 0 | 0.24007698 | 0 |
| USP32P1 down      | 1 | 3.56379426 | 0 | 0.28059981 | 0 |
| hsa-miR-3664-5p   | 1 | 4.26686707 | 0 | 0.23436399 | 0 |
| hsa-miR-514a-5p   | 1 | 4.26686707 | 0 | 0.23436399 | 0 |
| hsa-miR-4714-5p   | 1 | 4.26686707 | 0 | 0.23436399 | 0 |
| hsa-miR-4687-5p   | 1 | 3.81396126 | 0 | 0.26219459 | 0 |
| hsa-miR-8056      | 1 | 3.81396126 | 0 | 0.26219459 | 0 |
| hsa-miR-5092      | 1 | 3.81396126 | 0 | 0.26219459 | 0 |
| hsa-miR-6814-3p   | 1 | 4.02237809 | 0 | 0.24860915 | 0 |
| hsa-miR-6872-5p   | 1 | 4.02237809 | 0 | 0.24860915 | 0 |
| hsa-miR-6866-5p   | 1 | 3.67368069 | 0 | 0.27220656 | 0 |
| hsa-miR-6073      | 1 | 3.67368069 | 0 | 0.27220656 | 0 |
| hsa-miR-3156-5p   | 1 | 3.67368069 | 0 | 0.27220656 | 0 |
| hsa-miR-6741-5p   | 1 | 3.67368069 | 0 | 0.27220656 | 0 |
| hsa-miR-4460      | 1 | 3.67368069 | 0 | 0.27220656 | 0 |
| hsa-miR-888-5p    | 1 | 3.67368069 | 0 | 0.27220656 | 0 |
| hsa-miR-550b-2-5p | 1 | 3.67368069 | 0 | 0.27220656 | 0 |
| hsa-miR-4753-5p   | 1 | 4.18603874 | 0 | 0.23888933 | 0 |
| hsa-miR-6853-3p   | 1 | 3.83132933 | 0 | 0.26100602 | 0 |
| hsa-miR-3675-5p   | 1 | 3.83132933 | 0 | 0.26100602 | 0 |
| hsa-miR-6890-5p   | 1 | 3.83132933 | 0 | 0.26100602 | 0 |
| hsa-miR-6785-3p   | 1 | 3.83132933 | 0 | 0.26100602 | 0 |
| hsa-miR-4508      | 1 | 3.83132933 | 0 | 0.26100602 | 0 |
| hsa-miR-3178      | 1 | 3.83132933 | 0 | 0.26100602 | 0 |
| hsa-miR-517c-3p   | 1 | 3.78991316 | 0 | 0.26385829 | 0 |
| hsa-miR-517a-3p   | 1 | 3.78991316 | 0 | 0.26385829 | 0 |
| hsa-miR-4536-3p   | 1 | 3.78991316 | 0 | 0.26385829 | 0 |
| hsa-miR-517b-3p   | 1 | 3.78991316 | 0 | 0.26385829 | 0 |
| hsa-miR-4762-5p   | 1 | 3.78991316 | 0 | 0.26385829 | 0 |



Coefficient
